# Supplementary material for: Co(salen)-catalyzed aerobic oxidation of lignin models: investigating the role of ligands through data science
Source: Royal Society of Chemistry journal article supplement (doi:10.1039/d5re00454c), 2026-01-01
Supplement: d5re00454c4.zip [file Salen_Regression_Featurization.xlsx]

## Sheet: lit_descriptors_G1
	EE	Zero_Point	Thermal	Enthalpy	Gibbs	HOMO	LUMO	Dipole	Electronegativity	Chemical_potential	Hardness	Softness	Electrophilicity_index	Nucleophilicity_index	Mulliken_Charge_Co	Mulliken_Charge_N1	Mulliken_Charge_N2	Mulliken_Charge_O1	Mulliken_Charge_O2	Mulliken_Charge_O3	Mulliken_Charge_O4	Mulliken_Charge_O5	Mulliken_Spin_Co	Mulliken_Spin_N1	Mulliken_Spin_N2	Mulliken_Spin_O1	Mulliken_Spin_O2	Mulliken_Spin_O3	Mulliken_Spin_O4	Mulliken_Spin_O5	Mulliken_SpinFrac_Co	Mulliken_SpinFrac_N1	Mulliken_SpinFrac_N2	Mulliken_SpinFrac_O1	Mulliken_SpinFrac_O2	Mulliken_SpinFrac_O3	Mulliken_SpinFrac_O4	Mulliken_SpinFrac_O5	NPA_Charge_Co	NPA_Charge_N1	NPA_Charge_N2	NPA_Charge_O1	NPA_Charge_O2	NPA_Charge_O3	NPA_Charge_O4	NPA_Charge_O5	NPA_Core_Co	NPA_Core_N1	NPA_Core_N2
S01_1	-3441.66	-3440.74	-3440.69	-3440.69	-3440.82	-0.19349	-0.0494	6.2719	0.121445	-0.121445	0.072045	13.8802	0.102359	9.76955	0.625542	-0.278885	-0.271817	-0.40509	-0.433407	-0.065524	-8e-06	-0.352418	-0.824903	0.015055	0.012935	0.016381	0.015963	0.819051	0.932743	-0.01478	0.300009	0.00547535	0.00470433	0.00595761	0.00580558	0.297881	0.339229	0.00537534	1.24166	-0.61144	-0.59769	-0.75632	-0.78436	-0.12073	-0.0142	-0.79475	17.9998	1.99993	1.99993
S01_2	-3441.66	-3440.74	-3440.69	-3440.69	-3440.82	-0.19273	-0.04736	5.9035	0.120045	-0.120045	0.072685	13.758	0.0991319	10.0876	0.618836	-0.280754	-0.270999	-0.402501	-0.433524	-0.068649	-0.007303	-0.3473	-0.805169	0.01364	0.013707	0.016281	0.017217	0.809792	0.922961	-0.014663	0.294871	0.00499528	0.00501982	0.00596248	0.00630526	0.296564	0.33801	0.00536993	1.24021	-0.61518	-0.59538	-0.75328	-0.78451	-0.12562	-0.02263	-0.7897	17.9998	1.99993	1.99993
S01_3	-3441.66	-3440.74	-3440.69	-3440.69	-3440.82	-0.19336	-0.0485	6.24	0.12093	-0.12093	0.07243	13.8064	0.100953	9.90559	0.619147	-0.281841	-0.27016	-0.400642	-0.425648	-0.067157	-0.001835	-0.348452	-0.820352	0.014033	0.013389	0.016157	0.016611	0.815828	0.931349	-0.014826	0.298873	0.00511254	0.00487792	0.00588636	0.00605177	0.297225	0.339312	0.00540145	1.24034	-0.61731	-0.59509	-0.75424	-0.7787	-0.12317	-0.01566	-0.79003	17.9998	1.99993	1.99993
S01_4	-3441.66	-3440.74	-3440.68	-3440.68	-3440.82	-0.19333	-0.04931	6.3814	0.12132	-0.12132	0.07201	13.887	0.102198	9.78494	0.619099	-0.282092	-0.268299	-0.399965	-0.427971	-0.067573	-0.001021	-0.348733	-0.821175	0.014019	0.012981	0.016127	0.016906	0.815662	0.932217	-0.014903	0.297267	0.0050749	0.00469914	0.005838	0.00612	0.295271	0.337464	0.00539491	1.24025	-0.61788	-0.59198	-0.75354	-0.78132	-0.12349	-0.01473	-0.79071	17.9998	1.99993	1.99993
S01_6	-3441.66	-3440.74	-3440.69	-3440.68	-3440.82	-0.19401	-0.04756	6.0209	0.120785	-0.120785	0.073225	13.6565	0.0996177	10.0384	0.619774	-0.279806	-0.271161	-0.404107	-0.438144	-0.068581	-0.011954	-0.348728	-0.793699	0.013463	0.014035	0.016272	0.018461	0.805073	0.915344	-0.014387	0.290086	0.00492054	0.0051296	0.00594719	0.00674724	0.294243	0.334546	0.00525825	1.2415	-0.61254	-0.59476	-0.75333	-0.79002	-0.12698	-0.0283	-0.79211	17.9998	1.99993	1.99993
S01_7	-3441.66	-3440.74	-3440.69	-3440.69	-3440.82	-0.19387	-0.04755	5.9027	0.12071	-0.12071	0.07316	13.6687	0.0995825	10.0419	0.617408	-0.279912	-0.270539	-0.403699	-0.437599	-0.070164	-0.010098	-0.349387	-0.794045	0.013539	0.01424	0.016314	0.017909	0.804186	0.916171	-0.01449	0.291248	0.00496598	0.0052231	0.00598383	0.00656886	0.294968	0.336043	0.0053148	1.24035	-0.61247	-0.59309	-0.75161	-0.79126	-0.12813	-0.02731	-0.79342	17.9998	1.99993	1.99993
S01_8	-3441.66	-3440.74	-3440.69	-3440.69	-3440.82	-0.19539	-0.0491	6.8101	0.122245	-0.122245	0.073145	13.6715	0.102152	9.78932	0.627677	-0.276083	-0.274983	-0.405121	-0.432356	-0.051652	-0.031152	-0.350837	-0.791429	0.01495	0.016833	0.01288	0.021094	0.814672	0.894556	-0.012614	0.290925	0.00549553	0.00618771	0.00473461	0.00775403	0.299469	0.328833	0.00463683	1.25042	-0.60777	-0.59942	-0.75675	-0.78705	-0.11354	-0.0513	-0.79235	17.9998	1.99993	1.99993
S02_1	-3457.67	-3456.76	-3456.71	-3456.71	-3456.85	-0.19472	-0.05069	6.9534	0.122705	-0.122705	0.072015	13.886	0.104537	9.56596	0.623573	-0.279404	-0.270462	-0.404397	-0.435148	-0.066223	-0.000785	-0.352482	-0.821404	0.014848	0.013067	0.016349	0.015877	0.817053	0.931606	-0.014744	0.297979	0.00538637	0.00474029	0.00593089	0.00575966	0.2964	0.337957	0.00534865	1.24138	-0.61244	-0.59557	-0.7562	-0.78603	-0.12205	-0.01502	-0.79491	17.9998	1.99993	1.99993
S02_2	-3457.65	-3456.74	-3456.69	-3456.69	-3456.82	-0.19899	-0.09326	7.244	0.146125	-0.146125	0.052865	18.9161	0.201953	4.95164	0.631052	-0.282193	-0.277758	-0.397404	-0.393668	-0.059101	0.007112	-0.371688	-0.86438	0.016101	0.012469	0.016267	0.01429	0.838803	0.948136	-0.015209	0.302933	0.0056428	0.00436992	0.00570097	0.00500811	0.293969	0.332286	0.00533018	1.2777	-0.61018	-0.59175	-0.73496	-0.72922	-0.19836	-0.10121	-0.80409	17.9999	1.99993	1.99993
S02_3	-3457.67	-3456.76	-3456.71	-3456.71	-3456.84	-0.19496	-0.05082	6.9293	0.12289	-0.12289	0.07207	13.8754	0.104773	9.54446	0.619059	-0.281774	-0.267862	-0.400717	-0.430153	-0.067212	-0.000856	-0.348496	-0.82129	0.014047	0.013047	0.016203	0.016936	0.815811	0.932146	-0.014928	0.296968	0.00507922	0.00471764	0.00585881	0.00612385	0.294987	0.337053	0.00539778	1.24045	-0.61728	-0.5915	-0.75452	-0.78313	-0.12319	-0.01473	-0.79088	17.9998	1.99993	1.99993
S02_4	-3457.67	-3456.76	-3456.71	-3456.71	-3456.84	-0.19508	-0.05051	6.5214	0.122795	-0.122795	0.072285	13.8341	0.1043	9.58775	0.615611	-0.27884	-0.269007	-0.408982	-0.427185	-0.064948	-0.001517	-0.347527	-0.822066	0.014289	0.012638	0.016446	0.016772	0.816455	0.932933	-0.015524	0.29551	0.00513649	0.00454301	0.00591187	0.00602906	0.293493	0.335363	0.00558044	1.24569	-0.6202	-0.59234	-0.76062	-0.7837	-0.12456	-0.01424	-0.79153	17.9998	1.99993	1.99993
S02_5	-3457.67	-3456.76	-3456.71	-3456.71	-3456.85	-0.19237	-0.04716	5.5814	0.119765	-0.119765	0.072605	13.7732	0.0987787	10.1236	0.618017	-0.280591	-0.271075	-0.402041	-0.432298	-0.068987	-0.006982	-0.347034	-0.805521	0.013802	0.013335	0.016055	0.01673	0.80975	0.923824	-0.014714	0.295007	0.00505473	0.0048837	0.00587985	0.00612705	0.296556	0.338333	0.00538873	1.23996	-0.61565	-0.59536	-0.75295	-0.78297	-0.12618	-0.02182	-0.78932	17.9998	1.99993	1.99993
S02_6	-3457.66	-3456.74	-3456.7	-3456.69	-3456.82	-0.195	-0.0482	6.6422	0.1216	-0.1216	0.0734	13.624	0.100726	9.92793	0.619459	-0.278267	-0.270186	-0.403952	-0.438307	-0.070773	-0.014073	-0.349402	-0.783713	0.013459	0.013957	0.016038	0.017958	0.799802	0.911786	-0.014092	0.288984	0.00496284	0.00514647	0.00591381	0.00662179	0.294917	0.33621	0.00519625	1.24183	-0.61021	-0.59371	-0.75275	-0.79092	-0.13	-0.03077	-0.79314	17.9998	1.99993	1.99993
S02_7	-3457.67	-3456.76	-3456.71	-3456.71	-3456.85	-0.19509	-0.0487	6.917	0.121895	-0.121895	0.073195	13.6621	0.101499	9.85235	0.617277	-0.279659	-0.270197	-0.403855	-0.43741	-0.070617	-0.011578	-0.349102	-0.790266	0.013493	0.014209	0.016283	0.017885	0.80263	0.914274	-0.014434	0.290334	0.00495716	0.00522021	0.00598217	0.00657072	0.294876	0.335893	0.00530287	1.24069	-0.61215	-0.59259	-0.75168	-0.79099	-0.12881	-0.02896	-0.793	17.9998	1.99993	1.99993
S02_8	-3457.65	-3456.73	-3456.68	-3456.68	-3456.81	-0.20048	-0.09633	7.4517	0.148405	-0.148405	0.052075	19.2031	0.211465	4.72892	0.632733	-0.283461	-0.273632	-0.404561	-0.421336	-0.058733	0.028261	-0.352003	-0.894794	0.015326	0.013139	0.016323	0.017897	0.84364	0.968833	-0.014629	0.310928	0.00532557	0.00456562	0.00567201	0.00621896	0.293153	0.336656	0.00508337	1.26678	-0.60095	-0.58888	-0.73807	-0.76404	-0.19216	-0.08867	-0.78303	17.9999	1.99993	1.99993
S03_1	-3727.62	-3726.6	-3726.55	-3726.55	-3726.69	-0.19749	-0.05267	7.3607	0.12508	-0.12508	0.07241	13.8102	0.108031	9.25663	0.603293	-0.282757	-0.26018	-0.419894	-0.430212	-0.067682	-0.033446	-0.345389	-0.740023	0.01391	0.014936	0.014696	0.017443	0.783304	0.881168	-0.013823	0.257463	0.00483945	0.00519641	0.00511291	0.00606862	0.272521	0.306569	0.00480918	1.25377	-0.61883	-0.58499	-0.75334	-0.78567	-0.13502	-0.05472	-0.78805	17.9998	1.99993	1.99993
S03_2	-3727.62	-3726.61	-3726.55	-3726.55	-3726.7	-0.19571	-0.05039	7.3311	0.12305	-0.12305	0.07266	13.7627	0.104193	9.59759	0.617191	-0.279143	-0.267286	-0.402734	-0.436462	-0.070985	-0.010762	-0.348922	-0.785988	0.013598	0.013202	0.015946	0.017965	0.799086	0.914015	-0.014508	0.739019	0.0127854	0.0124131	0.0149931	0.0168914	0.751334	0.859395	0.013641	1.24212	-0.61353	-0.58811	-0.75248	-0.7919	-0.13045	-0.029	-0.79267	17.9998	1.99993	1.99993
S03_3	-3727.63	-3726.61	-3726.55	-3726.55	-3726.69	-0.19585	-0.0515	7.7362	0.123675	-0.123675	0.072175	13.8552	0.105961	9.43741	0.614286	-0.279806	-0.26468	-0.406511	-0.433899	-0.065965	-0.030729	-0.347826	-0.749825	0.013657	0.014269	0.011673	0.016963	0.791378	0.887681	-0.012775	0.26282	0.00478689	0.0050014	0.00409148	0.00594567	0.277385	0.31114	0.00447774	1.25309	-0.61124	-0.5911	-0.75748	-0.78824	-0.13179	-0.05067	-0.79121	17.9998	1.99993	1.99993
S03_4	-3727.62	-3726.6	-3726.55	-3726.55	-3726.7	-0.19541	-0.05213	6.8606	0.12377	-0.12377	0.07164	13.9587	0.106917	9.35308	0.62621	-0.281531	-0.26949	-0.404019	-0.433792	-0.063627	0.004651	-0.354147	-0.841485	0.014981	0.012921	0.016546	0.016361	0.826042	0.939954	-0.013935	0.793191	0.0141212	0.0121794	0.0155964	0.015422	0.778634	0.886008	0.0131352	1.2388	-0.61283	-0.59372	-0.7553	-0.78891	-0.11688	-0.00851	-0.79761	17.9998	1.99993	1.99993
S03_5	-3727.62	-3726.6	-3726.55	-3726.55	-3726.7	-0.19554	-0.05136	6.3642	0.12345	-0.12345	0.07209	13.8715	0.105701	9.46069	0.620098	-0.278101	-0.269082	-0.405659	-0.433491	-0.066213	-0.001459	-0.349567	-0.81795	0.015131	0.013088	0.016361	0.01594	0.814749	0.930424	-0.015118	0.285652	0.00528419	0.00457072	0.00571375	0.00556672	0.284535	0.324932	0.00527965	1.24548	-0.61437	-0.59241	-0.75663	-0.78819	-0.12489	-0.01563	-0.79568	17.9998	1.99993	1.99993
S03_6	-3727.63	-3726.61	-3726.55	-3726.55	-3726.7	-0.19504	-0.04848	6.8302	0.12176	-0.12176	0.07328	13.6463	0.101157	9.88567	0.620006	-0.279883	-0.271481	-0.404256	-0.437387	-0.069493	-0.012188	-0.349409	-0.792322	0.013736	0.013955	0.016213	0.017782	0.805028	0.914054	-0.014272	0.299027	0.00518404	0.0052667	0.00611888	0.00671103	0.303822	0.344969	0.00538633	1.24081	-0.61132	-0.59464	-0.75202	-0.79	-0.12693	-0.02943	-0.79295	17.9998	1.99993	1.99993
S03_7	-3727.63	-3726.61	-3726.55	-3726.55	-3726.7	-0.2012	-0.0973	8.209	0.14925	-0.14925	0.05195	19.2493	0.214394	4.6643	0.632349	-0.283816	-0.273262	-0.40383	-0.420377	-0.057519	0.027486	-0.350538	-0.896629	0.015381	0.013155	0.016297	0.017525	0.845912	0.9687	-0.014939	0.311748	0.0053478	0.00457384	0.00566628	0.00609324	0.294114	0.336806	0.00519412	1.26687	-0.60236	-0.58818	-0.73856	-0.7617	-0.19187	-0.08957	-0.78116	17.9999	1.99993	1.99993
S03_8	-3727.63	-3726.61	-3726.55	-3726.55	-3726.7	-0.19452	-0.05067	6.5652	0.122595	-0.122595	0.071925	13.9034	0.104481	9.57116	0.630842	-0.275799	-0.26743	-0.407051	-0.436627	-0.070582	-0.006793	-0.353585	-0.789138	0.015575	0.011304	0.015727	0.017112	0.801442	0.91482	-0.014295	0.36889	0.00728069	0.00528417	0.00735174	0.00799917	0.374642	0.427642	0.00668234	1.24815	-0.60962	-0.59091	-0.75447	-0.79525	-0.12741	-0.02698	-0.79735	17.9998	1.99993	1.99993
S03_9	-3727.63	-3726.61	-3726.55	-3726.55	-3726.7	-0.19422	-0.05056	6.8058	0.12239	-0.12239	0.07183	13.9218	0.104269	9.59056	0.619605	-0.282316	-0.267752	-0.400072	-0.42944	-0.067074	-0.000609	-0.348377	-0.82288	0.014123	0.012857	0.016268	0.017101	0.816588	0.932673	-0.014869	0.775638	0.0133122	0.0121189	0.015334	0.0161192	0.769707	0.879128	0.0140154	1.24029	-0.61806	-0.59139	-0.75375	-0.78249	-0.12283	-0.01431	-0.79076	17.9998	1.99993	1.99993
S04_1	-3496.92	-3495.98	-3495.93	-3495.93	-3496.07	-0.19338	-0.04968	6.3834	0.12153	-0.12153	0.07185	13.9179	0.10278	9.72948	0.619184	-0.282502	-0.267793	-0.399788	-0.429031	-0.067554	-0.000979	-0.348364	-0.821421	0.01402	0.01294	0.016326	0.017175	0.81565	0.932098	-0.014885	0.773606	0.0132039	0.0121868	0.0153757	0.0161752	0.768171	0.87784	0.0140185	1.2404	-0.61846	-0.5915	-0.75349	-0.7817	-0.12337	-0.01475	-0.79062	17.9998	1.99993	1.99993
S04_2	-3496.92	-3495.98	-3495.93	-3495.93	-3496.07	-0.19384	-0.0496	6.0669	0.12172	-0.12172	0.07212	13.8658	0.102716	9.73558	0.626706	-0.278616	-0.271934	-0.405647	-0.433944	-0.065508	4.7e-05	-0.352188	-0.824896	0.01512	0.012864	0.016306	0.016048	0.819077	0.932914	-0.01474	0.288258	0.00528366	0.0044953	0.0056981	0.00560794	0.286225	0.326005	0.00515087	1.24218	-0.61107	-0.59768	-0.75685	-0.78495	-0.1207	-0.01407	-0.79416	17.9998	1.99993	1.99993
S04_3	-3496.93	-3495.99	-3495.94	-3495.94	-3496.07	-0.19934	-0.0934	6.8381	0.14637	-0.14637	0.05297	18.8786	0.202229	4.94488	0.625513	-0.281947	-0.277694	-0.397727	-0.394376	-0.05819	0.006734	-0.371627	-0.865101	0.016192	0.012304	0.01622	0.014412	0.839327	0.948388	-0.015536	0.302664	0.00566492	0.00430467	0.00567472	0.00504217	0.293646	0.331802	0.00543541	1.27705	-0.61183	-0.59117	-0.73605	-0.73065	-0.19853	-0.10129	-0.80116	17.9999	1.99993	1.99993
S04_4	-3496.92	-3495.98	-3495.93	-3495.93	-3496.07	-0.19322	-0.04961	6.3687	0.121415	-0.121415	0.071805	13.9266	0.10265	9.74182	0.619866	-0.28279	-0.268242	-0.399696	-0.428468	-0.066862	-0.000332	-0.348504	-0.824759	0.014091	0.012868	0.016274	0.017132	0.817555	0.933381	-0.014879	0.288205	0.00492398	0.00449661	0.00568681	0.00598663	0.285688	0.326162	0.00519934	1.24017	-0.61857	-0.59202	-0.75346	-0.78121	-0.12238	-0.01385	-0.79053	17.9998	1.99993	1.99993
S04_5	-3496.92	-3495.98	-3495.93	-3495.93	-3496.07	-0.19409	-0.04764	6.2684	0.120865	-0.120865	0.073225	13.6565	0.0997497	10.0251	0.619867	-0.279864	-0.271595	-0.404003	-0.438019	-0.069015	-0.010347	-0.349526	-0.797687	0.013746	0.014048	0.016251	0.017566	0.807222	0.917074	-0.014309	0.279262	0.00481234	0.00491806	0.00568931	0.00614968	0.2826	0.321058	0.00500944	1.24004	-0.61162	-0.595	-0.75211	-0.79025	-0.12607	-0.02698	-0.79325	17.9998	1.99993	1.99993
S04_6	-3496.92	-3495.98	-3495.93	-3495.93	-3496.07	-0.19588	-0.05193	6.2513	0.123905	-0.123905	0.071975	13.8937	0.106651	9.37635	0.615772	-0.276732	-0.264218	-0.407002	-0.437218	-0.067813	-0.033367	-0.353249	-0.745892	0.013533	0.014223	0.012039	0.016822	0.789516	0.888311	-0.013438	0.262306	0.00475912	0.00500178	0.00423373	0.00591576	0.277648	0.312391	0.00472572	1.25243	-0.60919	-0.58863	-0.75394	-0.79505	-0.13256	-0.05051	-0.7968	17.9998	1.99993	1.99993
S04_7	-3496.92	-3495.99	-3495.93	-3495.93	-3496.07	-0.19618	-0.04956	6.7598	0.12287	-0.12287	0.07331	13.6407	0.102967	9.71184	0.614985	-0.28021	-0.26631	-0.406708	-0.434034	-0.060203	-0.025386	-0.348187	-0.771827	0.013838	0.014417	0.011819	0.016877	0.803896	0.896104	-0.01313	0.3733	0.00669286	0.00697289	0.00571635	0.00816269	0.38881	0.433408	0.00635043	1.25108	-0.61231	-0.59314	-0.75852	-0.7885	-0.12427	-0.0446	-0.79142	17.9998	1.99993	1.99993
S05_1	-3688.38	-3687.39	-3687.33	-3687.33	-3687.48	-0.18739	-0.05274	7.7869	0.120065	-0.120065	0.067325	14.8533	0.10706	9.34057	0.613353	-0.277892	-0.261207	-0.407111	-0.436808	-0.073216	-0.040567	-0.346408	-0.69252	0.013071	0.014342	0.011206	0.01705	0.76695	0.858515	-0.011742	0.24118	0.00455217	0.00499481	0.00390266	0.00593792	0.267102	0.298991	0.00408933	1.25939	-0.60718	-0.58797	-0.75657	-0.78916	-0.1399	-0.07321	-0.79023	17.9998	1.99993	1.99993
S05_2	-3688.38	-3687.39	-3687.33	-3687.33	-3687.48	-0.1985	-0.05463	7.8704	0.126565	-0.126565	0.071935	13.9014	0.111341	8.98138	0.61587	-0.276574	-0.263037	-0.408047	-0.438652	-0.071253	-0.033809	-0.352995	-0.735237	0.013511	0.014046	0.011954	0.017141	0.782479	0.884027	-0.013054	0.257206	0.00472651	0.00491367	0.00418183	0.00599638	0.273732	0.309256	0.00456664	1.25432	-0.60829	-0.5874	-0.75498	-0.79656	-0.13703	-0.05287	-0.79658	17.9998	1.99993	1.99993
S05_3	-3688.38	-3687.39	-3687.33	-3687.33	-3687.48	-0.19538	-0.05195	7.1361	0.123665	-0.123665	0.071715	13.9441	0.106624	9.37878	0.619523	-0.28265	-0.267309	-0.400747	-0.430284	-0.066741	-0.00039	-0.348206	-0.823865	0.014173	0.012905	0.016406	0.017034	0.817077	0.933152	-0.01486	0.28654	0.00492937	0.00448836	0.00570601	0.00592443	0.28418	0.32455	0.00516831	1.2402	-0.61823	-0.59092	-0.7545	-0.78331	-0.12237	-0.01393	-0.7905	17.9998	1.99993	1.99993
S05_4	-3688.38	-3687.39	-3687.34	-3687.34	-3687.48	-0.19383	-0.05194	7.627	0.122885	-0.122885	0.070945	14.0954	0.106426	9.39624	0.632749	-0.278024	-0.267415	-0.404565	-0.432363	-0.070267	-0.007922	-0.352315	-0.793968	0.015418	0.011257	0.016005	0.017294	0.804769	0.915306	-0.013526	0.29653	0.00575828	0.00420424	0.00597752	0.00645893	0.300564	0.341847	0.00505166	1.24628	-0.61062	-0.59113	-0.75272	-0.79189	-0.12509	-0.02803	-0.79555	17.9998	1.99993	1.99993
S05_5	-3688.38	-3687.39	-3687.33	-3687.33	-3687.48	-0.19347	-0.05151	6.5572	0.12249	-0.12249	0.07098	14.0885	0.10569	9.4616	0.625554	-0.283942	-0.268431	-0.401482	-0.431365	-0.06454	0.003796	-0.352432	-0.838949	0.014782	0.012589	0.016905	0.016893	0.82431	0.939133	-0.01415	0.291742	0.0051404	0.00437779	0.00587867	0.0058745	0.286652	0.326581	0.00492062	1.23938	-0.61711	-0.59199	-0.75382	-0.78566	-0.11802	-0.00934	-0.79504	17.9998	1.99993	1.99993
S06_1	-3766.88	-3765.83	-3765.77	-3765.77	-3765.92	-0.19524	-0.04898	7.1293	0.12211	-0.12211	0.07313	13.6743	0.101948	9.80896	0.623682	-0.280177	-0.268102	-0.404456	-0.438444	-0.066824	-0.010418	-0.349299	-0.800578	0.013551	0.013609	0.016577	0.018935	0.808644	0.918904	-0.014324	0.277685	0.00470024	0.00472035	0.00574982	0.0065677	0.280482	0.318727	0.00496835	1.24249	-0.6128	-0.59209	-0.75455	-0.79178	-0.12449	-0.02605	-0.7924	17.9998	1.99993	1.99993
S06_10	-3766.88	-3765.83	-3765.77	-3765.77	-3765.93	-0.19484	-0.0514	5.7425	0.12312	-0.12312	0.07172	13.9431	0.105679	9.46266	0.624099	-0.27934	-0.269036	-0.404449	-0.439109	-0.066806	-0.000309	-0.353294	-0.819978	0.014988	0.012478	0.016246	0.016398	0.815736	0.931668	-0.01485	0.31005	0.00566726	0.00471818	0.00614293	0.0062004	0.308446	0.352282	0.00561508	1.2418	-0.61214	-0.59261	-0.75601	-0.78978	-0.12277	-0.01463	-0.79565	17.9998	1.99993	1.99993
S06_11	-3766.88	-3765.83	-3765.77	-3765.77	-3765.92	-0.19465	-0.051	6.6309	0.122825	-0.122825	0.071825	13.9227	0.105019	9.52209	0.623083	-0.281558	-0.267446	-0.401363	-0.430377	-0.067982	-0.000841	-0.349287	-0.819645	0.014158	0.012664	0.016241	0.017064	0.815012	0.931861	-0.014637	0.285023	0.0049233	0.00440378	0.00564764	0.00593383	0.283412	0.324045	0.00508987	1.24036	-0.61551	-0.59082	-0.75361	-0.78624	-0.12336	-0.0149	-0.79231	17.9998	1.99993	1.99993
S06_12	-3766.88	-3765.83	-3765.77	-3765.77	-3765.92	-0.1969	-0.05286	6.7507	0.12488	-0.12488	0.07202	13.885	0.108269	9.23629	0.617817	-0.275624	-0.265273	-0.409196	-0.440119	-0.066705	-0.031651	-0.35382	-0.750341	0.01386	0.01455	0.012159	0.017001	0.791927	0.889895	-0.013687	0.262581	0.00485029	0.00509175	0.00425502	0.00594947	0.277134	0.311417	0.00478974	1.25402	-0.60857	-0.58967	-0.75632	-0.79655	-0.13098	-0.04938	-0.79738	17.9998	1.99993	1.99993
S06_2	-3766.88	-3765.83	-3765.77	-3765.77	-3765.92	-0.19512	-0.0509	6.2452	0.12301	-0.12301	0.07211	13.8677	0.104919	9.53114	0.620809	-0.277893	-0.268396	-0.405573	-0.433252	-0.06683	-0.002256	-0.350458	-0.81506	0.015071	0.01293	0.016285	0.015952	0.81359	0.929337	-0.01522	0.304542	0.00563119	0.00483122	0.0060848	0.00596037	0.303993	0.347241	0.00568686	1.24583	-0.61423	-0.59162	-0.7564	-0.78792	-0.12551	-0.01652	-0.79634	17.9998	1.99993	1.99993
S06_3	-3766.88	-3765.83	-3765.77	-3765.77	-3765.91	-0.19638	-0.05613	7.3674	0.126255	-0.126255	0.070125	14.2602	0.113657	8.79844	0.608675	-0.270616	-0.254527	-0.407286	-0.442319	-0.096861	-0.05188	-0.346823	-0.60879	0.011859	0.012639	0.010957	0.016315	0.713885	0.830114	-0.01086	0.211158	0.00411329	0.00438383	0.00380043	0.00565885	0.24761	0.287924	0.00376678	1.26952	-0.59768	-0.5822	-0.75244	-0.79518	-0.16996	-0.08937	-0.79316	17.9998	1.99993	1.99993
S06_4	-3766.88	-3765.83	-3765.77	-3765.77	-3765.92	-0.19487	-0.05153	6.9522	0.1232	-0.1232	0.07167	13.9528	0.10589	9.44378	0.629058	-0.275675	-0.269077	-0.406971	-0.435763	-0.06926	-0.006007	-0.354901	-0.796883	0.015402	0.011825	0.016507	0.017057	0.805866	0.917938	-0.014264	0.360621	0.00697001	0.00535128	0.00747007	0.00771897	0.364686	0.415403	0.00645502	1.24545	-0.6078	-0.59279	-0.75441	-0.79627	-0.12506	-0.02517	-0.79834	17.9998	1.99993	1.99993
S06_5	-3766.88	-3765.83	-3765.77	-3765.77	-3765.92	-0.19732	-0.05266	7.9806	0.12499	-0.12499	0.07233	13.8255	0.107995	9.25972	0.626117	-0.274067	-0.268402	-0.40668	-0.436847	-0.071113	-0.010665	-0.353815	-0.779774	0.014952	0.012076	0.016107	0.017135	0.798057	0.91004	-0.014177	0.271504	0.00520603	0.00420465	0.00560818	0.00596611	0.27787	0.31686	0.00493619	1.24611	-0.6061	-0.59148	-0.75382	-0.79618	-0.12902	-0.03096	-0.79765	17.9998	1.99993	1.99993
S06_6	-3766.88	-3765.83	-3765.77	-3765.77	-3765.92	-0.19384	-0.0491	5.7637	0.12147	-0.12147	0.07237	13.8179	0.101941	9.80958	0.615639	-0.27772	-0.268425	-0.406772	-0.427369	-0.067701	-0.004812	-0.347221	-0.809675	0.014335	0.012402	0.016218	0.016211	0.810935	0.927399	-0.015476	0.281596	0.00498556	0.00431328	0.00564045	0.00563801	0.282034	0.322539	0.00538239	1.24678	-0.61775	-0.59103	-0.7561	-0.78223	-0.12822	-0.01855	-0.79332	17.9998	1.99993	1.99993
S06_7	-3766.88	-3765.83	-3765.78	-3765.77	-3765.92	-0.1992	-0.05247	6.823	0.125835	-0.125835	0.073365	13.6305	0.107916	9.26651	0.612709	-0.276314	-0.257529	-0.404702	-0.43991	-0.080565	-0.043057	-0.346654	-0.670494	0.012897	0.013616	0.011046	0.017499	0.753261	0.852031	-0.011447	0.2341	0.00450293	0.00475396	0.00385666	0.0061097	0.262998	0.297483	0.00399667	1.26213	-0.60641	-0.58403	-0.75371	-0.79191	-0.14799	-0.07768	-0.79182	17.9998	1.99993	1.99993
S06_8	-3766.88	-3765.83	-3765.78	-3765.78	-3765.92	-0.19513	-0.05151	6.3455	0.12332	-0.12332	0.07181	13.9256	0.105889	9.44382	0.615354	-0.27751	-0.263488	-0.40557	-0.437536	-0.070249	-0.029488	-0.353364	-0.746547	0.013931	0.013634	0.01208	0.01735	0.786103	0.890671	-0.013229	0.260959	0.00486964	0.00476582	0.00422262	0.00606477	0.274786	0.311338	0.00462425	1.25293	-0.60998	-0.58814	-0.753	-0.79639	-0.13575	-0.04724	-0.79714	17.9998	1.99993	1.99993
S06_9	-3766.88	-3765.83	-3765.77	-3765.77	-3765.92	-0.19227	-0.0472	5.8371	0.119735	-0.119735	0.072535	13.7864	0.0988245	10.1189	0.618393	-0.280315	-0.269077	-0.401287	-0.435888	-0.069764	-0.00759	-0.347624	-0.802839	0.013663	0.013334	0.01624	0.017437	0.808048	0.922479	-0.014618	0.279546	0.00475741	0.00464285	0.00565471	0.0060715	0.281359	0.321204	0.00508993	1.24035	-0.61528	-0.59261	-0.75227	-0.78725	-0.12683	-0.02281	-0.79045	17.9998	1.99993	1.99993
S07_1	-3958.33	-3957.23	-3957.17	-3957.17	-3957.32	-0.19334	-0.05073	5.9501	0.122035	-0.122035	0.071305	14.0243	0.104428	9.57593	0.624626	-0.280763	-0.259407	-0.39924	-0.421515	-0.067362	-0.000223	-0.351263	-0.814928	0.014349	0.011822	0.015213	0.015871	0.812606	0.932743	-0.013961	0.769381	0.013547	0.0111613	0.0143627	0.014984	0.767188	0.880611	0.0131807	1.24623	-0.61707	-0.59513	-0.75342	-0.7688	-0.12495	-0.01353	-0.7906	17.9998	1.99993	1.99993
S07_2	-3958.33	-3957.23	-3957.17	-3957.17	-3957.33	-0.19514	-0.05099	6.5917	0.123065	-0.123065	0.072075	13.8744	0.105064	9.518	0.622116	-0.280095	-0.267858	-0.400925	-0.429147	-0.068047	-0.002034	-0.350658	-0.817019	0.014155	0.012924	0.016013	0.016298	0.814452	0.930369	-0.014891	0.770067	0.0133415	0.0121813	0.0150928	0.0153614	0.767647	0.876903	0.0140352	1.24123	-0.61477	-0.59111	-0.75349	-0.78226	-0.12421	-0.01612	-0.79229	17.9998	1.99993	1.99993
S07_3	-3958.33	-3957.23	-3957.17	-3957.17	-3957.33	-0.19662	-0.05065	7.6103	0.123635	-0.123635	0.072985	13.7014	0.104717	9.5495	0.61546	-0.278556	-0.26879	-0.402941	-0.432308	-0.070932	-0.015225	-0.347098	-0.774522	0.01348	0.012995	0.015685	0.01787	0.794523	0.908801	-0.014247	0.26997	0.00469863	0.00452958	0.00546722	0.00622883	0.276942	0.316775	0.00496598	1.24212	-0.61307	-0.5906	-0.75251	-0.7862	-0.13259	-0.03309	-0.79042	17.9998	1.99993	1.99993
S07_4	-3958.33	-3957.23	-3957.17	-3957.17	-3957.32	-0.19607	-0.053	6.6757	0.124535	-0.124535	0.071535	13.9792	0.108401	9.22499	0.614901	-0.278298	-0.264316	-0.410752	-0.441382	-0.047344	-0.002947	-0.352667	-0.827943	0.015315	0.013616	0.012697	0.01639	0.829268	0.916152	-0.01441	0.287456	0.00531727	0.00472739	0.00440832	0.0056905	0.287916	0.318082	0.00500306	1.25047	-0.61238	-0.59372	-0.76239	-0.79889	-0.10875	-0.02498	-0.79774	17.9998	1.99993	1.99993
S07_5	-3958.33	-3957.23	-3957.17	-3957.17	-3957.33	-0.19453	-0.04953	5.9586	0.12203	-0.12203	0.0725	13.7931	0.102699	9.73722	0.616545	-0.277024	-0.268578	-0.40671	-0.42868	-0.066926	-0.004085	-0.349928	-0.813065	0.01466	0.012505	0.016143	0.015716	0.812952	0.928495	-0.015435	0.284185	0.00512401	0.00437079	0.00564235	0.00549311	0.284146	0.32453	0.00539489	1.24695	-0.61681	-0.59113	-0.75652	-0.78293	-0.12708	-0.01764	-0.79498	17.9998	1.99993	1.99993
S07_6	-3958.33	-3957.23	-3957.17	-3957.17	-3957.32	-0.19689	-0.05406	7.9321	0.125475	-0.125475	0.071415	14.0027	0.110229	9.07204	0.607857	-0.280785	-0.262818	-0.409301	-0.426258	-0.059026	-0.021913	-0.345247	-0.774909	0.013001	0.015969	0.015205	0.016169	0.80311	0.896535	-0.014025	0.269137	0.00451543	0.00554626	0.00528091	0.00561572	0.278931	0.311379	0.00487108	1.25305	-0.6151	-0.59082	-0.75652	-0.78512	-0.12289	-0.04399	-0.78827	17.9998	1.99993	1.99993
S07_7	-3958.33	-3957.23	-3957.17	-3957.17	-3957.33	-0.19562	-0.04975	6.7067	0.122685	-0.122685	0.072935	13.7108	0.103185	9.69132	0.622818	-0.276594	-0.269565	-0.408227	-0.44772	-0.068868	-0.007413	-0.353963	-0.798568	0.014275	0.013879	0.016479	0.017514	0.806794	0.918692	-0.014589	0.27969	0.00499966	0.00486097	0.00577159	0.00613409	0.282571	0.321762	0.00510964	1.24272	-0.60759	-0.5928	-0.75472	-0.79986	-0.12609	-0.02497	-0.79783	17.9998	1.99993	1.99993
S07_8	-3958.33	-3957.23	-3957.17	-3957.17	-3957.33	-0.19306	-0.04971	5.9779	0.121385	-0.121385	0.071675	13.9519	0.102786	9.72899	0.616193	-0.28221	-0.271496	-0.405383	-0.41873	-0.060929	0.003521	-0.351387	-0.846674	0.015323	0.012495	0.015735	0.016401	0.828733	0.942171	-0.01554	0.310601	0.00562121	0.00458377	0.00577235	0.00601667	0.304019	0.345634	0.00570082	1.24157	-0.62296	-0.59716	-0.75783	-0.77207	-0.11652	-0.00771	-0.78934	17.9998	1.99993	1.99993
S07_9	-3958.33	-3957.23	-3957.17	-3957.17	-3957.33	-0.1965	-0.05252	6.8406	0.12451	-0.12451	0.07199	13.8908	0.107673	9.28739	0.613745	-0.275995	-0.265544	-0.406738	-0.436875	-0.065534	-0.034629	-0.352884	-0.748617	0.013309	0.014546	0.012321	0.016409	0.793245	0.888175	-0.013684	0.263003	0.00467571	0.00511029	0.0043286	0.0057648	0.278682	0.312033	0.00480745	1.2502	-0.60886	-0.58885	-0.75341	-0.79372	-0.12944	-0.05188	-0.79653	17.9998	1.99993	1.99993
S08_1	-3802.53	-3801.52	-3801.47	-3801.47	-3801.62	-0.19571	-0.04935	6.0368	0.12253	-0.12253	0.07318	13.6649	0.10258	9.74849	0.614557	-0.279037	-0.266094	-0.403303	-0.431622	-0.064072	-0.034185	-0.348822	-0.754506	0.012629	0.014889	0.011849	0.01652	0.795481	0.891401	-0.013172	0.295251	0.00494193	0.00582631	0.00463671	0.00646455	0.311285	0.34882	0.00515442	1.24827	-0.61107	-0.59052	-0.75299	-0.78742	-0.12831	-0.04989	-0.79273	17.9998	1.99993	1.99993
S08_2	-3802.5	-3801.49	-3801.44	-3801.44	-3801.59	-0.20445	-0.10687	7.2645	0.15566	-0.15566	0.04879	20.496	0.248309	4.02723	0.565173	-0.24784	-0.245118	-0.408191	-0.446715	-0.032803	0.024986	-0.383839	-0.90102	0.016924	0.017599	0.016151	0.01738	0.861622	0.967587	-0.020786	0.314419	0.00590579	0.00614134	0.00563604	0.00606491	0.300671	0.337649	0.00725347	1.28339	-0.59821	-0.58474	-0.74825	-0.80441	-0.19453	-0.1061	-0.81366	17.9999	1.99993	1.99993
S08_3	-3802.53	-3801.52	-3801.47	-3801.46	-3801.61	-0.19523	-0.053	6.2731	0.124115	-0.124115	0.071115	14.0617	0.108307	9.233	0.61803	-0.279582	-0.267917	-0.409082	-0.434274	-0.059206	-0.008018	-0.354199	-0.809755	0.015188	0.013812	0.012901	0.016969	0.814976	0.920257	-0.014338	0.282341	0.00529567	0.00481589	0.00449825	0.00591666	0.284161	0.32087	0.0049993	1.24752	-0.6124	-0.59314	-0.75789	-0.79565	-0.12088	-0.02319	-0.79708	17.9998	1.99993	1.99993
S08_4	-3802.53	-3801.52	-3801.47	-3801.46	-3801.62	-0.19279	-0.05046	8.1267	0.121625	-0.121625	0.071165	14.0519	0.103932	9.62168	0.620091	-0.283541	-0.269359	-0.39811	-0.423008	-0.065396	0.002374	-0.357677	-0.831495	0.013932	0.012938	0.016171	0.017143	0.820555	0.936434	-0.014429	0.288815	0.0048392	0.00449394	0.0056169	0.00595452	0.285015	0.325265	0.00501183	1.23795	-0.61935	-0.59246	-0.75	-0.77766	-0.12121	-0.01109	-0.79625	17.9998	1.99993	1.99993
S08_5	-3802.53	-3801.53	-3801.47	-3801.47	-3801.62	-0.20135	-0.05348	8.8877	0.127415	-0.127415	0.073935	13.5254	0.10979	9.10833	0.599856	-0.278471	-0.257606	-0.397387	-0.420963	-0.09093	-0.077175	-0.341504	-0.582319	0.011197	0.014158	0.012011	0.014169	0.712998	0.81085	-0.010994	0.262682	0.00505092	0.00638662	0.00541812	0.00639158	0.321631	0.365771	0.00495935	1.26059	-0.60843	-0.583	-0.74315	-0.77208	-0.16273	-0.11209	-0.78397	17.9998	1.99993	1.99993
S08_6	-3802.53	-3801.52	-3801.47	-3801.46	-3801.62	-0.19618	-0.05319	7.4839	0.124685	-0.124685	0.071495	13.987	0.108723	9.19766	0.629538	-0.275124	-0.265895	-0.408884	-0.445404	-0.069639	-0.008509	-0.354345	-0.784393	0.015253	0.012345	0.016536	0.016104	0.800874	0.91032	-0.014346	0.273135	0.00531128	0.00429868	0.00575804	0.00560761	0.278874	0.316984	0.00499545	1.24801	-0.60817	-0.58909	-0.75485	-0.80172	-0.12768	-0.0292	-0.79768	17.9998	1.99993	1.99993
S08_7	-3802.53	-3801.52	-3801.47	-3801.46	-3801.61	-0.19963	-0.09279	6.9032	0.14621	-0.14621	0.05342	18.7196	0.200088	4.99781	0.609986	-0.281536	-0.270355	-0.409536	-0.434084	-0.024099	0.002079	-0.351518	-0.8846	0.015397	0.012971	0.012739	0.016135	0.866451	0.940233	-0.016274	0.304558	0.00530102	0.00446578	0.0043859	0.00555511	0.29831	0.323712	0.00560297	1.26609	-0.60334	-0.58015	-0.74406	-0.78095	-0.17047	-0.10675	-0.78286	17.9999	1.99993	1.99993
S08_8	-3802.53	-3801.52	-3801.47	-3801.47	-3801.62	-0.19242	-0.04905	4.5581	0.120735	-0.120735	0.071685	13.9499	0.101674	9.8354	0.631628	-0.278322	-0.274357	-0.407651	-0.436918	-0.063107	0.003083	-0.350437	-0.837196	0.015408	0.012547	0.016433	0.016418	0.825152	0.937299	-0.014535	0.291203	0.00535939	0.00436425	0.00571592	0.0057107	0.287014	0.326022	0.00505574	1.24107	-0.61002	-0.60045	-0.75694	-0.78712	-0.11704	-0.01056	-0.79355	17.9998	1.99993	1.99993
[truncated: 459 more columns]

## Sheet: lit_descriptors_G2
	EE	Zero_Point	Thermal	Enthalpy	Gibbs	HOMO	LUMO	Dipole	Electronegativity	Chemical_potential	Hardness	Softness	Electrophilicity_index	Nucleophilicity_index	Mulliken_Charge_Co	Mulliken_Charge_N1	Mulliken_Charge_N2	Mulliken_Charge_O1	Mulliken_Charge_O2	Mulliken_Charge_O3	Mulliken_Charge_O4	Mulliken_Charge_O5	Mulliken_Spin_Co	Mulliken_Spin_N1	Mulliken_Spin_N2	Mulliken_Spin_O1	Mulliken_Spin_O2	Mulliken_Spin_O3	Mulliken_Spin_O4	Mulliken_Spin_O5	Mulliken_SpinFrac_Co	Mulliken_SpinFrac_N1	Mulliken_SpinFrac_N2	Mulliken_SpinFrac_O1	Mulliken_SpinFrac_O2	Mulliken_SpinFrac_O3	Mulliken_SpinFrac_O4	Mulliken_SpinFrac_O5	NPA_Charge_Co	NPA_Charge_N1	NPA_Charge_N2	NPA_Charge_O1	NPA_Charge_O2	NPA_Charge_O3	NPA_Charge_O4	NPA_Charge_O5	NPA_Core_Co	NPA_Core_N1	NPA_Core_N2
S09_1	-3442.84	-3441.9	-3441.85	-3441.85	-3441.99	-0.19392	-0.04952	6.4961	0.12172	-0.12172	0.0722	13.8504	0.102602	9.74638	0.60524	-0.304971	-0.285072	-0.409868	-0.426445	-0.058094	-0.032894	-0.344061	-0.773072	0.012812	0.015988	0.013142	0.01675	0.80469	0.896401	-0.014132	0.343957	0.00570034	0.00711342	0.00584717	0.00745245	0.358024	0.398829	0.00628764	1.24813	-0.62436	-0.59259	-0.75975	-0.77476	-0.12369	-0.04684	-0.78317	17.9998	1.99993	1.99993
S09_2	-3442.85	-3441.91	-3441.85	-3441.85	-3441.99	-0.19278	-0.04669	6.7162	0.119735	-0.119735	0.073045	13.6902	0.0981345	10.1901	0.604816	-0.309555	-0.285427	-0.41256	-0.42636	-0.05924	-0.030905	-0.345208	-0.774355	0.01363	0.015296	0.013283	0.016254	0.803734	0.898353	-0.013827	0.359608	0.00632974	0.00710342	0.00616859	0.00754832	0.373252	0.417193	0.00642122	1.24711	-0.6308	-0.59485	-0.76139	-0.77601	-0.1247	-0.04473	-0.78431	17.9998	1.99993	1.99993
S09_3	-3442.84	-3441.9	-3441.85	-3441.85	-3441.99	-0.19268	-0.05124	6.1227	0.12196	-0.12196	0.07072	14.1403	0.105163	9.50906	0.611886	-0.306626	-0.294653	-0.414243	-0.429057	-0.055138	0.00466	-0.346947	-0.85363	0.015459	0.013978	0.014791	0.017077	0.83444	0.937133	-0.014814	0.376291	0.00681452	0.00616167	0.00652006	0.00752775	0.367831	0.4131	0.00653019	1.24229	-0.63442	-0.5996	-0.76513	-0.77901	-0.11045	-0.01065	-0.7855	17.9998	1.99993	1.99993
S10_1	-3728.81	-3727.78	-3727.72	-3727.72	-3727.87	-0.19249	-0.0474	5.8457	0.119945	-0.119945	0.072545	13.7845	0.0991578	10.0849	0.611316	-0.294586	-0.302872	-0.432687	-0.408169	-0.056095	-0.002899	-0.348579	-0.835301	0.016665	0.013025	0.013197	0.017726	0.828177	0.927366	-0.015643	0.28846	0.00575504	0.00449801	0.00455741	0.00612144	0.286	0.320254	0.00540211	1.2435	-0.61971	-0.6114	-0.78375	-0.7603	-0.11327	-0.0191	-0.78974	17.9998	1.99993	1.99993
S10_10	-3728.81	-3727.77	-3727.71	-3727.71	-3727.86	-0.19196	-0.04695	6.5261	0.119455	-0.119455	0.072505	13.7922	0.0984035	10.1622	0.611431	-0.295768	-0.302105	-0.432797	-0.408236	-0.055779	-0.001955	-0.348522	-0.837678	0.016526	0.012977	0.013294	0.017734	0.829233	0.928298	-0.015638	0.289298	0.00570736	0.00448169	0.00459117	0.00612455	0.286381	0.320594	0.00540069	1.24317	-0.61934	-0.61089	-0.78333	-0.76068	-0.11254	-0.01825	-0.78994	17.9998	1.99993	1.99993
S10_11	-3728.81	-3727.77	-3727.71	-3727.71	-3727.86	-0.1938	-0.05237	5.5272	0.123085	-0.123085	0.070715	14.1413	0.10712	9.33536	0.611618	-0.288384	-0.298191	-0.435651	-0.411828	-0.054984	0.000558	-0.347553	-0.832845	0.014093	0.013541	0.013477	0.018628	0.82567	0.929559	-0.015852	0.306704	0.00518989	0.00498661	0.00496304	0.00685995	0.304061	0.34232	0.00583766	1.24583	-0.61469	-0.60877	-0.78742	-0.76254	-0.11501	-0.0162	-0.79491	17.9998	1.99993	1.99993
S10_12	-3728.81	-3727.77	-3727.71	-3727.71	-3727.86	-0.20184	-0.0971	6.2237	0.14947	-0.14947	0.05237	19.0949	0.213302	4.68818	0.612123	-0.293064	-0.298722	-0.432205	-0.411877	-0.054092	0.000771	-0.346999	-0.833782	0.014052	0.013541	0.013394	0.018529	0.826344	0.92952	-0.015816	0.287405	0.00484374	0.00466759	0.00461692	0.00638696	0.284842	0.320406	0.00545179	1.27773	-0.60701	-0.59693	-0.76853	-0.74566	-0.19746	-0.11098	-0.78306	17.9999	1.99993	1.99993
S10_2	-3728.81	-3727.77	-3727.72	-3727.71	-3727.87	-0.19354	-0.0503	5.7842	0.12192	-0.12192	0.07162	13.9626	0.103773	9.63639	0.614439	-0.288791	-0.301592	-0.430851	-0.410339	-0.058156	-0.001667	-0.348512	-0.832813	0.015222	0.013476	0.013302	0.017941	0.82617	0.928835	-0.016005	0.28748	0.0052545	0.0046518	0.00459174	0.00619308	0.285187	0.320626	0.00552479	1.2455	-0.61162	-0.6095	-0.78261	-0.7611	-0.11503	-0.0176	-0.78897	17.9998	1.99993	1.99993
S10_3	-3728.81	-3727.77	-3727.72	-3727.72	-3727.87	-0.19347	-0.05053	5.7539	0.122	-0.122	0.07147	13.9919	0.104128	9.6036	0.614259	-0.2895	-0.302346	-0.432004	-0.410331	-0.056538	-0.000391	-0.348775	-0.83921	0.015076	0.013552	0.013505	0.017975	0.829666	0.931254	-0.016102	0.323744	0.00581591	0.00522799	0.00520986	0.00693426	0.320062	0.359252	0.00621171	1.24476	-0.61254	-0.60951	-0.78357	-0.7613	-0.11297	-0.01601	-0.78959	17.9998	1.99993	1.99993
S10_4	-3728.81	-3727.78	-3727.72	-3727.72	-3727.87	-0.19197	-0.04702	6.0512	0.119495	-0.119495	0.072475	13.7979	0.0985102	10.1512	0.611655	-0.284168	-0.300729	-0.435492	-0.407633	-0.062585	-0.005798	-0.34832	-0.816213	0.016675	0.012581	0.013568	0.017327	0.816834	0.92182	-0.015383	0.282	0.00576119	0.00434672	0.00468772	0.00598645	0.282215	0.318487	0.0053148	1.24501	-0.62014	-0.6111	-0.78533	-0.75953	-0.1203	-0.02274	-0.79	17.9998	1.99993	1.99993
S10_5	-3728.81	-3727.77	-3727.72	-3727.71	-3727.87	-0.19341	-0.04902	5.1275	0.121215	-0.121215	0.072195	13.8514	0.10176	9.82708	0.613338	-0.294403	-0.302877	-0.437406	-0.409483	-0.049282	0.003591	-0.347064	-0.851164	0.015703	0.013347	0.013693	0.018286	0.836403	0.934836	-0.015312	0.293686	0.00541816	0.00460525	0.00472463	0.0063094	0.288593	0.322556	0.00528325	1.24464	-0.62436	-0.61589	-0.78884	-0.76234	-0.10807	-0.01264	-0.79764	17.9998	1.99993	1.99993
S10_6	-3728.81	-3727.78	-3727.72	-3727.72	-3727.87	-0.19468	-0.05275	4.9761	0.123715	-0.123715	0.070965	14.0915	0.107838	9.2732	0.61404	-0.293402	-0.298088	-0.437386	-0.413618	-0.050806	0.004128	-0.348579	-0.8488	0.014548	0.013729	0.014156	0.018446	0.833596	0.935489	-0.015442	0.292633	0.00501558	0.00473322	0.00488043	0.00635945	0.287391	0.32252	0.00532379	1.24469	-0.62264	-0.60971	-0.78808	-0.76474	-0.11032	-0.01177	-0.79678	17.9998	1.99993	1.99993
S10_7	-3728.81	-3727.77	-3727.71	-3727.71	-3727.87	-0.19266	-0.04777	6.1696	0.120215	-0.120215	0.072445	13.8036	0.0997422	10.0258	0.613348	-0.29367	-0.302346	-0.431522	-0.40842	-0.058272	-0.002513	-0.347881	-0.832116	0.016237	0.012804	0.01309	0.017564	0.825665	0.927811	-0.015576	0.287348	0.00560699	0.0044215	0.00452026	0.00606524	0.28512	0.320394	0.00537874	1.24401	-0.61842	-0.61185	-0.78175	-0.76049	-0.11517	-0.01828	-0.78919	17.9998	1.99993	1.99993
S10_8	-3728.81	-3727.77	-3727.71	-3727.71	-3727.87	-0.19426	-0.05323	5.2147	0.123745	-0.123745	0.070515	14.1814	0.108578	9.20993	0.613225	-0.290846	-0.297916	-0.4383	-0.412565	-0.052326	0.003313	-0.348131	-0.844027	0.014033	0.013505	0.01399	0.018477	0.830932	0.934477	-0.015684	0.29106	0.00483924	0.00465716	0.00482441	0.00637174	0.286545	0.322252	0.00540859	1.24558	-0.61877	-0.6099	-0.78897	-0.76355	-0.11236	-0.01237	-0.79668	17.9998	1.99993	1.99993
S10_9	-3728.81	-3727.77	-3727.71	-3727.71	-3727.87	-0.19361	-0.05055	5.4805	0.12208	-0.12208	0.07153	13.9801	0.104177	9.59907	0.614894	-0.289136	-0.302234	-0.431233	-0.410325	-0.056858	-0.000538	-0.348526	-0.838492	0.015205	0.013587	0.013389	0.018015	0.8293	0.930833	-0.016063	0.289579	0.00525116	0.00469237	0.00462399	0.00622161	0.286405	0.32147	0.00554747	1.24496	-0.61193	-0.60984	-0.78288	-0.76131	-0.11323	-0.01629	-0.78924	17.9998	1.99993	1.99993
S11_1	-3498.11	-3497.15	-3497.1	-3497.1	-3497.24	-0.19247	-0.04748	6.02	0.119975	-0.119975	0.072495	13.7941	0.0992758	10.0729	0.611718	-0.293011	-0.301866	-0.434466	-0.408301	-0.059094	-0.003333	-0.348892	-0.828087	0.016387	0.012792	0.013523	0.017315	0.823519	0.926209	-0.015635	0.286026	0.00566016	0.00441843	0.00467092	0.0059807	0.284448	0.319918	0.00540042	1.2439	-0.61876	-0.61138	-0.78473	-0.7604	-0.11626	-0.01965	-0.79035	17.9998	1.99993	1.99993
S11_2	-3498.11	-3497.15	-3497.1	-3497.1	-3497.24	-0.1941	-0.05209	5.2873	0.123095	-0.123095	0.071005	14.0835	0.106699	9.37213	0.614732	-0.293707	-0.298339	-0.43746	-0.413892	-0.050097	0.004572	-0.348316	-0.852297	0.014561	0.01372	0.014237	0.018378	0.835561	0.936965	-0.01545	0.293897	0.00502106	0.00473106	0.00490933	0.00633727	0.288126	0.323093	0.00532761	1.24455	-0.62261	-0.60967	-0.78832	-0.76504	-0.10933	-0.01082	-0.79677	17.9998	1.99993	1.99993
S11_3	-3498.1	-3497.15	-3497.09	-3497.09	-3497.23	-0.19259	-0.04761	6.4835	0.1201	-0.1201	0.07249	13.795	0.0994897	10.0513	0.611938	-0.293428	-0.302088	-0.434113	-0.408288	-0.058613	-0.002774	-0.348669	-0.829927	0.016333	0.012854	0.013499	0.017356	0.824431	0.926945	-0.015628	0.286598	0.00564026	0.00443886	0.00466159	0.00599353	0.2847	0.320101	0.0053968	1.24376	-0.61849	-0.61136	-0.78458	-0.7604	-0.11562	-0.01902	-0.79025	17.9998	1.99993	1.99993
S11_4	-3498.1	-3497.14	-3497.09	-3497.09	-3497.23	-0.19361	-0.05026	5.6112	0.121935	-0.121935	0.071675	13.9519	0.103719	9.64142	0.613683	-0.289009	-0.301586	-0.430708	-0.410232	-0.058167	-0.002678	-0.348671	-0.830455	0.015362	0.0135	0.013133	0.018012	0.825382	0.927126	-0.015963	0.286775	0.00530485	0.00466185	0.00453512	0.00621995	0.285023	0.320158	0.00551238	1.24545	-0.61114	-0.60946	-0.78242	-0.76086	-0.11524	-0.01906	-0.78915	17.9998	1.99993	1.99993
S11_5	-3498.1	-3497.15	-3497.09	-3497.09	-3497.23	-0.19192	-0.04733	6.9068	0.119625	-0.119625	0.072295	13.8322	0.0989705	10.104	0.611431	-0.293467	-0.30182	-0.438009	-0.408054	-0.057372	-0.001464	-0.349406	-0.834683	0.016013	0.01289	0.013701	0.01758	0.826641	0.928585	-0.015709	0.288276	0.00553043	0.00445184	0.00473193	0.00607163	0.285498	0.320707	0.00542544	1.24339	-0.6158	-0.61113	-0.78819	-0.76012	-0.11418	-0.01767	-0.79147	17.9998	1.99993	1.99993
S11_6	-3498.1	-3497.15	-3497.09	-3497.09	-3497.23	-0.19412	-0.05198	5.2738	0.12305	-0.12305	0.07107	14.0706	0.106524	9.38757	0.60895	-0.291543	-0.29787	-0.43251	-0.412893	-0.051811	-0.000942	-0.346722	-0.837721	0.015087	0.013601	0.012989	0.018609	0.82967	0.929316	-0.015809	0.288846	0.00520199	0.00468961	0.0044786	0.00641637	0.28607	0.320427	0.00545093	1.24592	-0.61946	-0.60908	-0.78387	-0.7636	-0.11276	-0.01728	-0.79409	17.9998	1.99993	1.99993
S12_1	-3689.56	-3688.55	-3688.5	-3688.49	-3688.64	-0.19473	-0.05176	4.7687	0.123245	-0.123245	0.071485	13.9889	0.106241	9.41253	0.613485	-0.289383	-0.302064	-0.430047	-0.409555	-0.058493	-0.002172	-0.348557	-0.83005	0.015168	0.013406	0.013102	0.018087	0.824663	0.927739	-0.016018	0.286553	0.00523636	0.00462807	0.00452312	0.00624406	0.284693	0.320278	0.0055298	1.24556	-0.61243	-0.61011	-0.78167	-0.76042	-0.11581	-0.01832	-0.78908	17.9998	1.99993	1.99993
S12_10	-3689.56	-3688.55	-3688.49	-3688.49	-3688.64	-0.19347	-0.04839	5.4773	0.12093	-0.12093	0.07254	13.7855	0.1008	9.92063	0.611568	-0.294648	-0.301893	-0.434737	-0.408514	-0.057344	-0.002395	-0.349081	-0.834192	0.016599	0.012881	0.013296	0.017601	0.826828	0.928111	-0.015745	0.307202	0.0061128	0.0047436	0.00489642	0.0064818	0.30449	0.341789	0.0057983	1.24378	-0.61944	-0.61149	-0.78507	-0.76072	-0.1145	-0.01828	-0.79049	17.9998	1.99993	1.99993
S12_2	-3689.56	-3688.55	-3688.5	-3688.5	-3688.65	-0.19586	-0.0543	4.6782	0.12508	-0.12508	0.07078	14.1283	0.110519	9.04825	0.615119	-0.294629	-0.298715	-0.438816	-0.414609	-0.049595	0.006024	-0.350654	-0.855229	0.014678	0.013814	0.014587	0.018497	0.836401	0.938447	-0.01548	0.294796	0.00505947	0.00476166	0.00502811	0.00637588	0.288306	0.323481	0.00533592	1.24472	-0.62453	-0.61099	-0.78942	-0.76584	-0.10885	-0.00944	-0.79786	17.9998	1.99993	1.99993
S12_3	-3689.56	-3688.55	-3688.5	-3688.5	-3688.65	-0.19366	-0.0486	5.4392	0.12113	-0.12113	0.07253	13.7874	0.101148	9.88654	0.613667	-0.294606	-0.303447	-0.432155	-0.408284	-0.057631	-0.001326	-0.348606	-0.835062	0.016261	0.013012	0.013315	0.017728	0.827126	0.928634	-0.015671	0.288427	0.00561647	0.00449428	0.00459894	0.00612317	0.285685	0.320746	0.00541269	1.24404	-0.61964	-0.61236	-0.78294	-0.76022	-0.11423	-0.01765	-0.78968	17.9998	1.99993	1.99993
S12_4	-3689.56	-3688.55	-3688.49	-3688.49	-3688.64	-0.19545	-0.05081	4.2419	0.12313	-0.12313	0.07232	13.8274	0.104819	9.54027	0.612022	-0.293925	-0.303604	-0.438937	-0.410525	-0.047787	0.004444	-0.349529	-0.857027	0.016261	0.013567	0.013649	0.018444	0.839396	0.936432	-0.015391	0.295475	0.00560627	0.00467746	0.00470573	0.00635889	0.289397	0.322851	0.00530632	1.24353	-0.62407	-0.6166	-0.79027	-0.76294	-0.10637	-0.0117	-0.79897	17.9998	1.99993	1.99993
S12_5	-3689.56	-3688.55	-3688.5	-3688.5	-3688.64	-0.19585	-0.05403	4.6514	0.12494	-0.12494	0.07091	14.1024	0.110069	9.0852	0.613198	-0.293432	-0.298624	-0.436739	-0.413065	-0.051772	0.00405	-0.349259	-0.846065	0.014475	0.013711	0.013993	0.018546	0.83183	0.93493	-0.015531	0.292099	0.00499741	0.00473364	0.004831	0.0064029	0.287184	0.322779	0.00536199	1.24461	-0.623	-0.61057	-0.78751	-0.76404	-0.11144	-0.01195	-0.79748	17.9998	1.99993	1.99993
S12_6	-3689.56	-3688.55	-3688.5	-3688.49	-3688.64	-0.19578	-0.05506	4.799	0.12542	-0.12542	0.07036	14.2126	0.111784	8.94586	0.612859	-0.291656	-0.299321	-0.440662	-0.412671	-0.050208	0.005434	-0.350356	-0.852565	0.014543	0.013755	0.014152	0.01859	0.835255	0.936994	-0.015698	0.293802	0.00501165	0.0047401	0.00487691	0.00640629	0.287837	0.322897	0.00540968	1.24453	-0.62023	-0.6115	-0.79169	-0.76407	-0.10952	-0.01054	-0.79886	17.9998	1.99993	1.99993
S12_7	-3689.56	-3688.55	-3688.49	-3688.49	-3688.65	-0.20261	-0.09749	5.8375	0.15005	-0.15005	0.05256	19.0259	0.214184	4.66889	0.615229	-0.290594	-0.301988	-0.428616	-0.409996	-0.057249	-0.000911	-0.347865	-0.83616	0.015294	0.013416	0.012855	0.018136	0.8279	0.930144	-0.015947	0.288656	0.00527974	0.00463142	0.00443775	0.00626084	0.285805	0.321101	0.00550516	1.2767	-0.59885	-0.59829	-0.76505	-0.74413	-0.19704	-0.11133	-0.77722	17.9999	1.99993	1.99993
S12_8	-3689.56	-3688.55	-3688.5	-3688.49	-3688.65	-0.19382	-0.04873	4.9875	0.121275	-0.121275	0.072545	13.7845	0.101369	9.86495	0.611872	-0.294307	-0.303466	-0.431101	-0.408295	-0.055035	-0.003033	-0.348473	-0.838362	0.016795	0.013207	0.013065	0.017978	0.830315	0.927973	-0.015661	0.28957	0.00580098	0.00456169	0.00451264	0.00620959	0.28679	0.320521	0.0054093	1.24369	-0.6201	-0.61253	-0.78254	-0.7602	-0.11226	-0.01904	-0.78938	17.9998	1.99993	1.99993
S12_9	-3689.56	-3688.55	-3688.49	-3688.49	-3688.64	-0.19432	-0.05177	4.9842	0.123045	-0.123045	0.071275	14.0302	0.106209	9.41541	0.612851	-0.287885	-0.302005	-0.431849	-0.410349	-0.057775	-0.001689	-0.349087	-0.834483	0.015068	0.01349	0.013387	0.01802	0.827048	0.929433	-0.016104	0.288107	0.00520226	0.00465745	0.00462189	0.00622144	0.28554	0.320888	0.00555994	1.2451	-0.61326	-0.60917	-0.78323	-0.7612	-0.11486	-0.01732	-0.78969	17.9998	1.99993	1.99993
S13_1	-3804.23	-3803.18	-3803.12	-3803.12	-3803.28	-0.193	-0.04869	6.6153	0.120845	-0.120845	0.072155	13.8591	0.101195	9.88187	0.613101	-0.30068	-0.298541	-0.421481	-0.406939	-0.050873	-0.02276	-0.346607	-0.812616	0.01323	0.015928	0.012181	0.017508	0.825817	0.91188	-0.01433	0.381904	0.00621769	0.00748567	0.00572469	0.00822822	0.388108	0.428555	0.00673466	1.2477	-0.61997	-0.61236	-0.77047	-0.75873	-0.11247	-0.03532	-0.78512	17.9998	1.99993	1.99993
S13_10	-3804.24	-3803.18	-3803.12	-3803.12	-3803.27	-0.19648	-0.05238	5.1023	0.12443	-0.12443	0.07205	13.8793	0.107445	9.30709	0.619642	-0.2927	-0.303665	-0.423272	-0.415428	-0.031795	-0.037227	-0.353063	-0.82893	0.013597	0.016184	0.015072	0.016881	0.850392	0.897035	-0.013675	0.394381	0.00646906	0.00769988	0.00717082	0.00803149	0.404592	0.426783	0.00650617	1.24803	-0.62181	-0.61217	-0.77753	-0.76547	-0.08782	-0.0543	-0.79673	17.9998	1.99993	1.99993
S13_11	-3804.24	-3803.18	-3803.12	-3803.12	-3803.27	-0.20373	-0.10527	3.7857	0.1545	-0.1545	0.04923	20.3128	0.242436	4.1248	0.611621	-0.296932	-0.303364	-0.424441	-0.407361	-0.03458	-0.002635	-0.347978	-0.883607	0.015952	0.016171	0.014284	0.019537	0.858711	0.938491	-0.014558	0.412591	0.00744862	0.00755088	0.00666976	0.00912259	0.400966	0.438218	0.0067977	1.27674	-0.61363	-0.59788	-0.76473	-0.74534	-0.18563	-0.11161	-0.77922	17.9999	1.99993	1.99993
S13_2	-3804.21	-3803.16	-3803.1	-3803.1	-3803.25	-0.19662	-0.09748	8.5071	0.14705	-0.14705	0.04957	20.1735	0.218113	4.58478	0.632784	-0.292932	-0.294475	-0.407868	-0.393391	-0.103138	-0.097352	-0.339649	0.185916	-0.005168	-0.004622	-0.004598	-0.006319	0.331221	0.509929	0.000823	0.173816	0.00483165	0.00432118	0.00429874	0.00590773	0.309664	0.476741	0.000769436	1.28474	-0.61815	-0.60176	-0.75383	-0.7449	-0.18712	-0.11637	-0.77646	17.9999	1.99993	1.99993
S13_3	-3804.23	-3803.18	-3803.12	-3803.12	-3803.27	-0.19678	-0.05541	3.356	0.126095	-0.126095	0.070685	14.1473	0.11247	8.89122	0.619475	-0.301816	-0.299597	-0.420523	-0.411607	-0.037684	-0.043671	-0.345057	-0.801713	0.012399	0.016001	0.014201	0.01657	0.837515	0.886736	-0.014196	0.384084	0.00594011	0.00766576	0.00680341	0.00793835	0.401237	0.424817	0.00680102	1.25101	-0.61768	-0.60922	-0.77005	-0.75999	-0.0947	-0.06233	-0.79116	17.9998	1.99993	1.99993
S13_4	-3804.23	-3803.18	-3803.12	-3803.12	-3803.27	-0.19533	-0.05082	6.4271	0.123075	-0.123075	0.072255	13.8399	0.104819	9.54022	0.623172	-0.294121	-0.301159	-0.420008	-0.40741	-0.044335	-0.05124	-0.345437	-0.777467	0.014799	0.015223	0.013505	0.016384	0.825245	0.875898	-0.014029	0.371312	0.00706788	0.00727038	0.00644988	0.00782486	0.39413	0.418322	0.00670013	1.25191	-0.61005	-0.60739	-0.76787	-0.75633	-0.10142	-0.07099	-0.78463	17.9998	1.99993	1.99993
S13_5	-3804.24	-3803.18	-3803.12	-3803.12	-3803.27	-0.19509	-0.05024	5.2486	0.122665	-0.122665	0.072425	13.8074	0.103878	9.62669	0.613967	-0.27628	-0.298268	-0.419555	-0.406378	-0.057598	-0.044228	-0.344943	-0.75104	0.012817	0.015738	0.012034	0.016899	0.800523	0.879425	-0.013408	0.366768	0.00625915	0.00768561	0.00587677	0.00825258	0.390933	0.429465	0.00654776	1.25443	-0.6113	-0.61004	-0.76876	-0.75601	-0.12276	-0.06188	-0.78293	17.9998	1.99993	1.99993
S13_6	-3804.23	-3803.18	-3803.12	-3803.12	-3803.27	-0.19667	-0.05112	3.4749	0.123895	-0.123895	0.072775	13.741	0.105462	9.4821	0.614964	-0.277878	-0.300494	-0.418494	-0.408103	-0.053551	-0.034921	-0.346014	-0.779196	0.012501	0.016565	0.01186	0.017526	0.814341	0.891119	-0.013882	0.370833	0.00594944	0.00788356	0.00564437	0.00834092	0.387559	0.424099	0.00660668	1.2526	-0.61	-0.61213	-0.76796	-0.75738	-0.11523	-0.05241	-0.78393	17.9998	1.99993	1.99993
S13_7	-3804.24	-3803.18	-3803.12	-3803.12	-3803.28	-0.1936	-0.04901	6.4564	0.121305	-0.121305	0.072295	13.8322	0.10177	9.82609	0.612077	-0.300219	-0.299065	-0.421188	-0.407363	-0.050944	-0.023595	-0.347009	-0.811073	0.013227	0.016112	0.012181	0.017673	0.825167	0.910873	-0.014411	0.304453	0.00496502	0.00604796	0.00457238	0.00663392	0.309743	0.341915	0.00540946	1.24768	-0.62043	-0.61198	-0.77069	-0.75859	-0.11272	-0.0362	-0.78513	17.9998	1.99993	1.99993
S13_8	-3804.24	-3803.18	-3803.12	-3803.12	-3803.28	-0.1958	-0.05112	4.0305	0.12346	-0.12346	0.07234	13.8236	0.105352	9.49196	0.628055	-0.296876	-0.300724	-0.415255	-0.408497	-0.041701	-0.050839	-0.346345	-0.785229	0.0145	0.015598	0.013751	0.016538	0.830972	0.876951	-0.013662	0.378892	0.00699661	0.00752642	0.0066352	0.00797999	0.400964	0.42315	0.00659225	1.25255	-0.61011	-0.6089	-0.76463	-0.75725	-0.0976	-0.07057	-0.7842	17.9998	1.99993	1.99993
S13_9	-3804.24	-3803.18	-3803.12	-3803.12	-3803.28	-0.19626	-0.05289	2.9462	0.124575	-0.124575	0.071685	13.9499	0.108244	9.23839	0.608186	-0.30796	-0.2972	-0.424156	-0.412099	-0.041333	-0.011187	-0.345557	-0.845761	0.013	0.016666	0.012525	0.01929	0.840104	0.925766	-0.014718	0.397015	0.00610242	0.0078233	0.00587945	0.00905505	0.394359	0.43457	0.00690888	1.2468	-0.62694	-0.61289	-0.77504	-0.76266	-0.10437	-0.0235	-0.79356	17.9998	1.99993	1.99993
[truncated: 466 more columns]

## Sheet: lit_descriptors_All
	EE	Zero_Point	Thermal	Enthalpy	Gibbs	HOMO	LUMO	Dipole	Electronegativity	Chemical_potential	Hardness	Softness	Electrophilicity_index	Nucleophilicity_index	Mulliken_Charge_Co	Mulliken_Charge_N1	Mulliken_Charge_N2	Mulliken_Charge_O1	Mulliken_Charge_O2	Mulliken_Charge_O3	Mulliken_Charge_O4	Mulliken_Charge_O5	Mulliken_Spin_Co	Mulliken_Spin_N1	Mulliken_Spin_N2	Mulliken_Spin_O1	Mulliken_Spin_O2	Mulliken_Spin_O3	Mulliken_Spin_O4	Mulliken_Spin_O5	Mulliken_SpinFrac_Co	Mulliken_SpinFrac_N1	Mulliken_SpinFrac_N2	Mulliken_SpinFrac_O1	Mulliken_SpinFrac_O2	Mulliken_SpinFrac_O3	Mulliken_SpinFrac_O4	Mulliken_SpinFrac_O5	NPA_Charge_Co	NPA_Charge_N1	NPA_Charge_N2	NPA_Charge_O1	NPA_Charge_O2	NPA_Charge_O3	NPA_Charge_O4	NPA_Charge_O5	NPA_Core_Co	NPA_Core_N1	NPA_Core_N2
S01_1	-3441.66	-3440.74	-3440.69	-3440.69	-3440.82	-0.19349	-0.0494	6.2719	0.121445	-0.121445	0.072045	13.8802	0.102359	9.76955	0.625542	-0.278885	-0.271817	-0.40509	-0.433407	-0.065524	-8e-06	-0.352418	-0.824903	0.015055	0.012935	0.016381	0.015963	0.819051	0.932743	-0.01478	0.300009	0.00547535	0.00470433	0.00595761	0.00580558	0.297881	0.339229	0.00537534	1.24166	-0.61144	-0.59769	-0.75632	-0.78436	-0.12073	-0.0142	-0.79475	17.9998	1.99993	1.99993
S01_2	-3441.66	-3440.74	-3440.69	-3440.69	-3440.82	-0.19273	-0.04736	5.9035	0.120045	-0.120045	0.072685	13.758	0.0991319	10.0876	0.618836	-0.280754	-0.270999	-0.402501	-0.433524	-0.068649	-0.007303	-0.3473	-0.805169	0.01364	0.013707	0.016281	0.017217	0.809792	0.922961	-0.014663	0.294871	0.00499528	0.00501982	0.00596248	0.00630526	0.296564	0.33801	0.00536993	1.24021	-0.61518	-0.59538	-0.75328	-0.78451	-0.12562	-0.02263	-0.7897	17.9998	1.99993	1.99993
S01_3	-3441.66	-3440.74	-3440.69	-3440.69	-3440.82	-0.19336	-0.0485	6.24	0.12093	-0.12093	0.07243	13.8064	0.100953	9.90559	0.619147	-0.281841	-0.27016	-0.400642	-0.425648	-0.067157	-0.001835	-0.348452	-0.820352	0.014033	0.013389	0.016157	0.016611	0.815828	0.931349	-0.014826	0.298873	0.00511254	0.00487792	0.00588636	0.00605177	0.297225	0.339312	0.00540145	1.24034	-0.61731	-0.59509	-0.75424	-0.7787	-0.12317	-0.01566	-0.79003	17.9998	1.99993	1.99993
S01_4	-3441.66	-3440.74	-3440.68	-3440.68	-3440.82	-0.19333	-0.04931	6.3814	0.12132	-0.12132	0.07201	13.887	0.102198	9.78494	0.619099	-0.282092	-0.268299	-0.399965	-0.427971	-0.067573	-0.001021	-0.348733	-0.821175	0.014019	0.012981	0.016127	0.016906	0.815662	0.932217	-0.014903	0.297267	0.0050749	0.00469914	0.005838	0.00612	0.295271	0.337464	0.00539491	1.24025	-0.61788	-0.59198	-0.75354	-0.78132	-0.12349	-0.01473	-0.79071	17.9998	1.99993	1.99993
S01_6	-3441.66	-3440.74	-3440.69	-3440.68	-3440.82	-0.19401	-0.04756	6.0209	0.120785	-0.120785	0.073225	13.6565	0.0996177	10.0384	0.619774	-0.279806	-0.271161	-0.404107	-0.438144	-0.068581	-0.011954	-0.348728	-0.793699	0.013463	0.014035	0.016272	0.018461	0.805073	0.915344	-0.014387	0.290086	0.00492054	0.0051296	0.00594719	0.00674724	0.294243	0.334546	0.00525825	1.2415	-0.61254	-0.59476	-0.75333	-0.79002	-0.12698	-0.0283	-0.79211	17.9998	1.99993	1.99993
S01_7	-3441.66	-3440.74	-3440.69	-3440.69	-3440.82	-0.19387	-0.04755	5.9027	0.12071	-0.12071	0.07316	13.6687	0.0995825	10.0419	0.617408	-0.279912	-0.270539	-0.403699	-0.437599	-0.070164	-0.010098	-0.349387	-0.794045	0.013539	0.01424	0.016314	0.017909	0.804186	0.916171	-0.01449	0.291248	0.00496598	0.0052231	0.00598383	0.00656886	0.294968	0.336043	0.0053148	1.24035	-0.61247	-0.59309	-0.75161	-0.79126	-0.12813	-0.02731	-0.79342	17.9998	1.99993	1.99993
S01_8	-3441.66	-3440.74	-3440.69	-3440.69	-3440.82	-0.19539	-0.0491	6.8101	0.122245	-0.122245	0.073145	13.6715	0.102152	9.78932	0.627677	-0.276083	-0.274983	-0.405121	-0.432356	-0.051652	-0.031152	-0.350837	-0.791429	0.01495	0.016833	0.01288	0.021094	0.814672	0.894556	-0.012614	0.290925	0.00549553	0.00618771	0.00473461	0.00775403	0.299469	0.328833	0.00463683	1.25042	-0.60777	-0.59942	-0.75675	-0.78705	-0.11354	-0.0513	-0.79235	17.9998	1.99993	1.99993
S02_1	-3457.67	-3456.76	-3456.71	-3456.71	-3456.85	-0.19472	-0.05069	6.9534	0.122705	-0.122705	0.072015	13.886	0.104537	9.56596	0.623573	-0.279404	-0.270462	-0.404397	-0.435148	-0.066223	-0.000785	-0.352482	-0.821404	0.014848	0.013067	0.016349	0.015877	0.817053	0.931606	-0.014744	0.297979	0.00538637	0.00474029	0.00593089	0.00575966	0.2964	0.337957	0.00534865	1.24138	-0.61244	-0.59557	-0.7562	-0.78603	-0.12205	-0.01502	-0.79491	17.9998	1.99993	1.99993
S02_2	-3457.65	-3456.74	-3456.69	-3456.69	-3456.82	-0.19899	-0.09326	7.244	0.146125	-0.146125	0.052865	18.9161	0.201953	4.95164	0.631052	-0.282193	-0.277758	-0.397404	-0.393668	-0.059101	0.007112	-0.371688	-0.86438	0.016101	0.012469	0.016267	0.01429	0.838803	0.948136	-0.015209	0.302933	0.0056428	0.00436992	0.00570097	0.00500811	0.293969	0.332286	0.00533018	1.2777	-0.61018	-0.59175	-0.73496	-0.72922	-0.19836	-0.10121	-0.80409	17.9999	1.99993	1.99993
S02_3	-3457.67	-3456.76	-3456.71	-3456.71	-3456.84	-0.19496	-0.05082	6.9293	0.12289	-0.12289	0.07207	13.8754	0.104773	9.54446	0.619059	-0.281774	-0.267862	-0.400717	-0.430153	-0.067212	-0.000856	-0.348496	-0.82129	0.014047	0.013047	0.016203	0.016936	0.815811	0.932146	-0.014928	0.296968	0.00507922	0.00471764	0.00585881	0.00612385	0.294987	0.337053	0.00539778	1.24045	-0.61728	-0.5915	-0.75452	-0.78313	-0.12319	-0.01473	-0.79088	17.9998	1.99993	1.99993
S02_4	-3457.67	-3456.76	-3456.71	-3456.71	-3456.84	-0.19508	-0.05051	6.5214	0.122795	-0.122795	0.072285	13.8341	0.1043	9.58775	0.615611	-0.27884	-0.269007	-0.408982	-0.427185	-0.064948	-0.001517	-0.347527	-0.822066	0.014289	0.012638	0.016446	0.016772	0.816455	0.932933	-0.015524	0.29551	0.00513649	0.00454301	0.00591187	0.00602906	0.293493	0.335363	0.00558044	1.24569	-0.6202	-0.59234	-0.76062	-0.7837	-0.12456	-0.01424	-0.79153	17.9998	1.99993	1.99993
S02_5	-3457.67	-3456.76	-3456.71	-3456.71	-3456.85	-0.19237	-0.04716	5.5814	0.119765	-0.119765	0.072605	13.7732	0.0987787	10.1236	0.618017	-0.280591	-0.271075	-0.402041	-0.432298	-0.068987	-0.006982	-0.347034	-0.805521	0.013802	0.013335	0.016055	0.01673	0.80975	0.923824	-0.014714	0.295007	0.00505473	0.0048837	0.00587985	0.00612705	0.296556	0.338333	0.00538873	1.23996	-0.61565	-0.59536	-0.75295	-0.78297	-0.12618	-0.02182	-0.78932	17.9998	1.99993	1.99993
S02_6	-3457.66	-3456.74	-3456.7	-3456.69	-3456.82	-0.195	-0.0482	6.6422	0.1216	-0.1216	0.0734	13.624	0.100726	9.92793	0.619459	-0.278267	-0.270186	-0.403952	-0.438307	-0.070773	-0.014073	-0.349402	-0.783713	0.013459	0.013957	0.016038	0.017958	0.799802	0.911786	-0.014092	0.288984	0.00496284	0.00514647	0.00591381	0.00662179	0.294917	0.33621	0.00519625	1.24183	-0.61021	-0.59371	-0.75275	-0.79092	-0.13	-0.03077	-0.79314	17.9998	1.99993	1.99993
S02_7	-3457.67	-3456.76	-3456.71	-3456.71	-3456.85	-0.19509	-0.0487	6.917	0.121895	-0.121895	0.073195	13.6621	0.101499	9.85235	0.617277	-0.279659	-0.270197	-0.403855	-0.43741	-0.070617	-0.011578	-0.349102	-0.790266	0.013493	0.014209	0.016283	0.017885	0.80263	0.914274	-0.014434	0.290334	0.00495716	0.00522021	0.00598217	0.00657072	0.294876	0.335893	0.00530287	1.24069	-0.61215	-0.59259	-0.75168	-0.79099	-0.12881	-0.02896	-0.793	17.9998	1.99993	1.99993
S02_8	-3457.65	-3456.73	-3456.68	-3456.68	-3456.81	-0.20048	-0.09633	7.4517	0.148405	-0.148405	0.052075	19.2031	0.211465	4.72892	0.632733	-0.283461	-0.273632	-0.404561	-0.421336	-0.058733	0.028261	-0.352003	-0.894794	0.015326	0.013139	0.016323	0.017897	0.84364	0.968833	-0.014629	0.310928	0.00532557	0.00456562	0.00567201	0.00621896	0.293153	0.336656	0.00508337	1.26678	-0.60095	-0.58888	-0.73807	-0.76404	-0.19216	-0.08867	-0.78303	17.9999	1.99993	1.99993
S03_1	-3727.62	-3726.6	-3726.55	-3726.55	-3726.69	-0.19749	-0.05267	7.3607	0.12508	-0.12508	0.07241	13.8102	0.108031	9.25663	0.603293	-0.282757	-0.26018	-0.419894	-0.430212	-0.067682	-0.033446	-0.345389	-0.740023	0.01391	0.014936	0.014696	0.017443	0.783304	0.881168	-0.013823	0.257463	0.00483945	0.00519641	0.00511291	0.00606862	0.272521	0.306569	0.00480918	1.25377	-0.61883	-0.58499	-0.75334	-0.78567	-0.13502	-0.05472	-0.78805	17.9998	1.99993	1.99993
S03_2	-3727.62	-3726.61	-3726.55	-3726.55	-3726.7	-0.19571	-0.05039	7.3311	0.12305	-0.12305	0.07266	13.7627	0.104193	9.59759	0.617191	-0.279143	-0.267286	-0.402734	-0.436462	-0.070985	-0.010762	-0.348922	-0.785988	0.013598	0.013202	0.015946	0.017965	0.799086	0.914015	-0.014508	0.739019	0.0127854	0.0124131	0.0149931	0.0168914	0.751334	0.859395	0.013641	1.24212	-0.61353	-0.58811	-0.75248	-0.7919	-0.13045	-0.029	-0.79267	17.9998	1.99993	1.99993
S03_3	-3727.63	-3726.61	-3726.55	-3726.55	-3726.69	-0.19585	-0.0515	7.7362	0.123675	-0.123675	0.072175	13.8552	0.105961	9.43741	0.614286	-0.279806	-0.26468	-0.406511	-0.433899	-0.065965	-0.030729	-0.347826	-0.749825	0.013657	0.014269	0.011673	0.016963	0.791378	0.887681	-0.012775	0.26282	0.00478689	0.0050014	0.00409148	0.00594567	0.277385	0.31114	0.00447774	1.25309	-0.61124	-0.5911	-0.75748	-0.78824	-0.13179	-0.05067	-0.79121	17.9998	1.99993	1.99993
S03_4	-3727.62	-3726.6	-3726.55	-3726.55	-3726.7	-0.19541	-0.05213	6.8606	0.12377	-0.12377	0.07164	13.9587	0.106917	9.35308	0.62621	-0.281531	-0.26949	-0.404019	-0.433792	-0.063627	0.004651	-0.354147	-0.841485	0.014981	0.012921	0.016546	0.016361	0.826042	0.939954	-0.013935	0.793191	0.0141212	0.0121794	0.0155964	0.015422	0.778634	0.886008	0.0131352	1.2388	-0.61283	-0.59372	-0.7553	-0.78891	-0.11688	-0.00851	-0.79761	17.9998	1.99993	1.99993
S03_5	-3727.62	-3726.6	-3726.55	-3726.55	-3726.7	-0.19554	-0.05136	6.3642	0.12345	-0.12345	0.07209	13.8715	0.105701	9.46069	0.620098	-0.278101	-0.269082	-0.405659	-0.433491	-0.066213	-0.001459	-0.349567	-0.81795	0.015131	0.013088	0.016361	0.01594	0.814749	0.930424	-0.015118	0.285652	0.00528419	0.00457072	0.00571375	0.00556672	0.284535	0.324932	0.00527965	1.24548	-0.61437	-0.59241	-0.75663	-0.78819	-0.12489	-0.01563	-0.79568	17.9998	1.99993	1.99993
S03_6	-3727.63	-3726.61	-3726.55	-3726.55	-3726.7	-0.19504	-0.04848	6.8302	0.12176	-0.12176	0.07328	13.6463	0.101157	9.88567	0.620006	-0.279883	-0.271481	-0.404256	-0.437387	-0.069493	-0.012188	-0.349409	-0.792322	0.013736	0.013955	0.016213	0.017782	0.805028	0.914054	-0.014272	0.299027	0.00518404	0.0052667	0.00611888	0.00671103	0.303822	0.344969	0.00538633	1.24081	-0.61132	-0.59464	-0.75202	-0.79	-0.12693	-0.02943	-0.79295	17.9998	1.99993	1.99993
S03_7	-3727.63	-3726.61	-3726.55	-3726.55	-3726.7	-0.2012	-0.0973	8.209	0.14925	-0.14925	0.05195	19.2493	0.214394	4.6643	0.632349	-0.283816	-0.273262	-0.40383	-0.420377	-0.057519	0.027486	-0.350538	-0.896629	0.015381	0.013155	0.016297	0.017525	0.845912	0.9687	-0.014939	0.311748	0.0053478	0.00457384	0.00566628	0.00609324	0.294114	0.336806	0.00519412	1.26687	-0.60236	-0.58818	-0.73856	-0.7617	-0.19187	-0.08957	-0.78116	17.9999	1.99993	1.99993
S03_8	-3727.63	-3726.61	-3726.55	-3726.55	-3726.7	-0.19452	-0.05067	6.5652	0.122595	-0.122595	0.071925	13.9034	0.104481	9.57116	0.630842	-0.275799	-0.26743	-0.407051	-0.436627	-0.070582	-0.006793	-0.353585	-0.789138	0.015575	0.011304	0.015727	0.017112	0.801442	0.91482	-0.014295	0.36889	0.00728069	0.00528417	0.00735174	0.00799917	0.374642	0.427642	0.00668234	1.24815	-0.60962	-0.59091	-0.75447	-0.79525	-0.12741	-0.02698	-0.79735	17.9998	1.99993	1.99993
S03_9	-3727.63	-3726.61	-3726.55	-3726.55	-3726.7	-0.19422	-0.05056	6.8058	0.12239	-0.12239	0.07183	13.9218	0.104269	9.59056	0.619605	-0.282316	-0.267752	-0.400072	-0.42944	-0.067074	-0.000609	-0.348377	-0.82288	0.014123	0.012857	0.016268	0.017101	0.816588	0.932673	-0.014869	0.775638	0.0133122	0.0121189	0.015334	0.0161192	0.769707	0.879128	0.0140154	1.24029	-0.61806	-0.59139	-0.75375	-0.78249	-0.12283	-0.01431	-0.79076	17.9998	1.99993	1.99993
S04_1	-3496.92	-3495.98	-3495.93	-3495.93	-3496.07	-0.19338	-0.04968	6.3834	0.12153	-0.12153	0.07185	13.9179	0.10278	9.72948	0.619184	-0.282502	-0.267793	-0.399788	-0.429031	-0.067554	-0.000979	-0.348364	-0.821421	0.01402	0.01294	0.016326	0.017175	0.81565	0.932098	-0.014885	0.773606	0.0132039	0.0121868	0.0153757	0.0161752	0.768171	0.87784	0.0140185	1.2404	-0.61846	-0.5915	-0.75349	-0.7817	-0.12337	-0.01475	-0.79062	17.9998	1.99993	1.99993
S04_2	-3496.92	-3495.98	-3495.93	-3495.93	-3496.07	-0.19384	-0.0496	6.0669	0.12172	-0.12172	0.07212	13.8658	0.102716	9.73558	0.626706	-0.278616	-0.271934	-0.405647	-0.433944	-0.065508	4.7e-05	-0.352188	-0.824896	0.01512	0.012864	0.016306	0.016048	0.819077	0.932914	-0.01474	0.288258	0.00528366	0.0044953	0.0056981	0.00560794	0.286225	0.326005	0.00515087	1.24218	-0.61107	-0.59768	-0.75685	-0.78495	-0.1207	-0.01407	-0.79416	17.9998	1.99993	1.99993
S04_3	-3496.93	-3495.99	-3495.94	-3495.94	-3496.07	-0.19934	-0.0934	6.8381	0.14637	-0.14637	0.05297	18.8786	0.202229	4.94488	0.625513	-0.281947	-0.277694	-0.397727	-0.394376	-0.05819	0.006734	-0.371627	-0.865101	0.016192	0.012304	0.01622	0.014412	0.839327	0.948388	-0.015536	0.302664	0.00566492	0.00430467	0.00567472	0.00504217	0.293646	0.331802	0.00543541	1.27705	-0.61183	-0.59117	-0.73605	-0.73065	-0.19853	-0.10129	-0.80116	17.9999	1.99993	1.99993
S04_4	-3496.92	-3495.98	-3495.93	-3495.93	-3496.07	-0.19322	-0.04961	6.3687	0.121415	-0.121415	0.071805	13.9266	0.10265	9.74182	0.619866	-0.28279	-0.268242	-0.399696	-0.428468	-0.066862	-0.000332	-0.348504	-0.824759	0.014091	0.012868	0.016274	0.017132	0.817555	0.933381	-0.014879	0.288205	0.00492398	0.00449661	0.00568681	0.00598663	0.285688	0.326162	0.00519934	1.24017	-0.61857	-0.59202	-0.75346	-0.78121	-0.12238	-0.01385	-0.79053	17.9998	1.99993	1.99993
S04_5	-3496.92	-3495.98	-3495.93	-3495.93	-3496.07	-0.19409	-0.04764	6.2684	0.120865	-0.120865	0.073225	13.6565	0.0997497	10.0251	0.619867	-0.279864	-0.271595	-0.404003	-0.438019	-0.069015	-0.010347	-0.349526	-0.797687	0.013746	0.014048	0.016251	0.017566	0.807222	0.917074	-0.014309	0.279262	0.00481234	0.00491806	0.00568931	0.00614968	0.2826	0.321058	0.00500944	1.24004	-0.61162	-0.595	-0.75211	-0.79025	-0.12607	-0.02698	-0.79325	17.9998	1.99993	1.99993
S04_6	-3496.92	-3495.98	-3495.93	-3495.93	-3496.07	-0.19588	-0.05193	6.2513	0.123905	-0.123905	0.071975	13.8937	0.106651	9.37635	0.615772	-0.276732	-0.264218	-0.407002	-0.437218	-0.067813	-0.033367	-0.353249	-0.745892	0.013533	0.014223	0.012039	0.016822	0.789516	0.888311	-0.013438	0.262306	0.00475912	0.00500178	0.00423373	0.00591576	0.277648	0.312391	0.00472572	1.25243	-0.60919	-0.58863	-0.75394	-0.79505	-0.13256	-0.05051	-0.7968	17.9998	1.99993	1.99993
S04_7	-3496.92	-3495.99	-3495.93	-3495.93	-3496.07	-0.19618	-0.04956	6.7598	0.12287	-0.12287	0.07331	13.6407	0.102967	9.71184	0.614985	-0.28021	-0.26631	-0.406708	-0.434034	-0.060203	-0.025386	-0.348187	-0.771827	0.013838	0.014417	0.011819	0.016877	0.803896	0.896104	-0.01313	0.3733	0.00669286	0.00697289	0.00571635	0.00816269	0.38881	0.433408	0.00635043	1.25108	-0.61231	-0.59314	-0.75852	-0.7885	-0.12427	-0.0446	-0.79142	17.9998	1.99993	1.99993
S05_1	-3688.38	-3687.39	-3687.33	-3687.33	-3687.48	-0.18739	-0.05274	7.7869	0.120065	-0.120065	0.067325	14.8533	0.10706	9.34057	0.613353	-0.277892	-0.261207	-0.407111	-0.436808	-0.073216	-0.040567	-0.346408	-0.69252	0.013071	0.014342	0.011206	0.01705	0.76695	0.858515	-0.011742	0.24118	0.00455217	0.00499481	0.00390266	0.00593792	0.267102	0.298991	0.00408933	1.25939	-0.60718	-0.58797	-0.75657	-0.78916	-0.1399	-0.07321	-0.79023	17.9998	1.99993	1.99993
S05_2	-3688.38	-3687.39	-3687.33	-3687.33	-3687.48	-0.1985	-0.05463	7.8704	0.126565	-0.126565	0.071935	13.9014	0.111341	8.98138	0.61587	-0.276574	-0.263037	-0.408047	-0.438652	-0.071253	-0.033809	-0.352995	-0.735237	0.013511	0.014046	0.011954	0.017141	0.782479	0.884027	-0.013054	0.257206	0.00472651	0.00491367	0.00418183	0.00599638	0.273732	0.309256	0.00456664	1.25432	-0.60829	-0.5874	-0.75498	-0.79656	-0.13703	-0.05287	-0.79658	17.9998	1.99993	1.99993
S05_3	-3688.38	-3687.39	-3687.33	-3687.33	-3687.48	-0.19538	-0.05195	7.1361	0.123665	-0.123665	0.071715	13.9441	0.106624	9.37878	0.619523	-0.28265	-0.267309	-0.400747	-0.430284	-0.066741	-0.00039	-0.348206	-0.823865	0.014173	0.012905	0.016406	0.017034	0.817077	0.933152	-0.01486	0.28654	0.00492937	0.00448836	0.00570601	0.00592443	0.28418	0.32455	0.00516831	1.2402	-0.61823	-0.59092	-0.7545	-0.78331	-0.12237	-0.01393	-0.7905	17.9998	1.99993	1.99993
S05_4	-3688.38	-3687.39	-3687.34	-3687.34	-3687.48	-0.19383	-0.05194	7.627	0.122885	-0.122885	0.070945	14.0954	0.106426	9.39624	0.632749	-0.278024	-0.267415	-0.404565	-0.432363	-0.070267	-0.007922	-0.352315	-0.793968	0.015418	0.011257	0.016005	0.017294	0.804769	0.915306	-0.013526	0.29653	0.00575828	0.00420424	0.00597752	0.00645893	0.300564	0.341847	0.00505166	1.24628	-0.61062	-0.59113	-0.75272	-0.79189	-0.12509	-0.02803	-0.79555	17.9998	1.99993	1.99993
S05_5	-3688.38	-3687.39	-3687.33	-3687.33	-3687.48	-0.19347	-0.05151	6.5572	0.12249	-0.12249	0.07098	14.0885	0.10569	9.4616	0.625554	-0.283942	-0.268431	-0.401482	-0.431365	-0.06454	0.003796	-0.352432	-0.838949	0.014782	0.012589	0.016905	0.016893	0.82431	0.939133	-0.01415	0.291742	0.0051404	0.00437779	0.00587867	0.0058745	0.286652	0.326581	0.00492062	1.23938	-0.61711	-0.59199	-0.75382	-0.78566	-0.11802	-0.00934	-0.79504	17.9998	1.99993	1.99993
S06_1	-3766.88	-3765.83	-3765.77	-3765.77	-3765.92	-0.19524	-0.04898	7.1293	0.12211	-0.12211	0.07313	13.6743	0.101948	9.80896	0.623682	-0.280177	-0.268102	-0.404456	-0.438444	-0.066824	-0.010418	-0.349299	-0.800578	0.013551	0.013609	0.016577	0.018935	0.808644	0.918904	-0.014324	0.277685	0.00470024	0.00472035	0.00574982	0.0065677	0.280482	0.318727	0.00496835	1.24249	-0.6128	-0.59209	-0.75455	-0.79178	-0.12449	-0.02605	-0.7924	17.9998	1.99993	1.99993
S06_10	-3766.88	-3765.83	-3765.77	-3765.77	-3765.93	-0.19484	-0.0514	5.7425	0.12312	-0.12312	0.07172	13.9431	0.105679	9.46266	0.624099	-0.27934	-0.269036	-0.404449	-0.439109	-0.066806	-0.000309	-0.353294	-0.819978	0.014988	0.012478	0.016246	0.016398	0.815736	0.931668	-0.01485	0.31005	0.00566726	0.00471818	0.00614293	0.0062004	0.308446	0.352282	0.00561508	1.2418	-0.61214	-0.59261	-0.75601	-0.78978	-0.12277	-0.01463	-0.79565	17.9998	1.99993	1.99993
S06_11	-3766.88	-3765.83	-3765.77	-3765.77	-3765.92	-0.19465	-0.051	6.6309	0.122825	-0.122825	0.071825	13.9227	0.105019	9.52209	0.623083	-0.281558	-0.267446	-0.401363	-0.430377	-0.067982	-0.000841	-0.349287	-0.819645	0.014158	0.012664	0.016241	0.017064	0.815012	0.931861	-0.014637	0.285023	0.0049233	0.00440378	0.00564764	0.00593383	0.283412	0.324045	0.00508987	1.24036	-0.61551	-0.59082	-0.75361	-0.78624	-0.12336	-0.0149	-0.79231	17.9998	1.99993	1.99993
S06_12	-3766.88	-3765.83	-3765.77	-3765.77	-3765.92	-0.1969	-0.05286	6.7507	0.12488	-0.12488	0.07202	13.885	0.108269	9.23629	0.617817	-0.275624	-0.265273	-0.409196	-0.440119	-0.066705	-0.031651	-0.35382	-0.750341	0.01386	0.01455	0.012159	0.017001	0.791927	0.889895	-0.013687	0.262581	0.00485029	0.00509175	0.00425502	0.00594947	0.277134	0.311417	0.00478974	1.25402	-0.60857	-0.58967	-0.75632	-0.79655	-0.13098	-0.04938	-0.79738	17.9998	1.99993	1.99993
S06_2	-3766.88	-3765.83	-3765.77	-3765.77	-3765.92	-0.19512	-0.0509	6.2452	0.12301	-0.12301	0.07211	13.8677	0.104919	9.53114	0.620809	-0.277893	-0.268396	-0.405573	-0.433252	-0.06683	-0.002256	-0.350458	-0.81506	0.015071	0.01293	0.016285	0.015952	0.81359	0.929337	-0.01522	0.304542	0.00563119	0.00483122	0.0060848	0.00596037	0.303993	0.347241	0.00568686	1.24583	-0.61423	-0.59162	-0.7564	-0.78792	-0.12551	-0.01652	-0.79634	17.9998	1.99993	1.99993
S06_3	-3766.88	-3765.83	-3765.77	-3765.77	-3765.91	-0.19638	-0.05613	7.3674	0.126255	-0.126255	0.070125	14.2602	0.113657	8.79844	0.608675	-0.270616	-0.254527	-0.407286	-0.442319	-0.096861	-0.05188	-0.346823	-0.60879	0.011859	0.012639	0.010957	0.016315	0.713885	0.830114	-0.01086	0.211158	0.00411329	0.00438383	0.00380043	0.00565885	0.24761	0.287924	0.00376678	1.26952	-0.59768	-0.5822	-0.75244	-0.79518	-0.16996	-0.08937	-0.79316	17.9998	1.99993	1.99993
S06_4	-3766.88	-3765.83	-3765.77	-3765.77	-3765.92	-0.19487	-0.05153	6.9522	0.1232	-0.1232	0.07167	13.9528	0.10589	9.44378	0.629058	-0.275675	-0.269077	-0.406971	-0.435763	-0.06926	-0.006007	-0.354901	-0.796883	0.015402	0.011825	0.016507	0.017057	0.805866	0.917938	-0.014264	0.360621	0.00697001	0.00535128	0.00747007	0.00771897	0.364686	0.415403	0.00645502	1.24545	-0.6078	-0.59279	-0.75441	-0.79627	-0.12506	-0.02517	-0.79834	17.9998	1.99993	1.99993
S06_5	-3766.88	-3765.83	-3765.77	-3765.77	-3765.92	-0.19732	-0.05266	7.9806	0.12499	-0.12499	0.07233	13.8255	0.107995	9.25972	0.626117	-0.274067	-0.268402	-0.40668	-0.436847	-0.071113	-0.010665	-0.353815	-0.779774	0.014952	0.012076	0.016107	0.017135	0.798057	0.91004	-0.014177	0.271504	0.00520603	0.00420465	0.00560818	0.00596611	0.27787	0.31686	0.00493619	1.24611	-0.6061	-0.59148	-0.75382	-0.79618	-0.12902	-0.03096	-0.79765	17.9998	1.99993	1.99993
S06_6	-3766.88	-3765.83	-3765.77	-3765.77	-3765.92	-0.19384	-0.0491	5.7637	0.12147	-0.12147	0.07237	13.8179	0.101941	9.80958	0.615639	-0.27772	-0.268425	-0.406772	-0.427369	-0.067701	-0.004812	-0.347221	-0.809675	0.014335	0.012402	0.016218	0.016211	0.810935	0.927399	-0.015476	0.281596	0.00498556	0.00431328	0.00564045	0.00563801	0.282034	0.322539	0.00538239	1.24678	-0.61775	-0.59103	-0.7561	-0.78223	-0.12822	-0.01855	-0.79332	17.9998	1.99993	1.99993
S06_7	-3766.88	-3765.83	-3765.78	-3765.77	-3765.92	-0.1992	-0.05247	6.823	0.125835	-0.125835	0.073365	13.6305	0.107916	9.26651	0.612709	-0.276314	-0.257529	-0.404702	-0.43991	-0.080565	-0.043057	-0.346654	-0.670494	0.012897	0.013616	0.011046	0.017499	0.753261	0.852031	-0.011447	0.2341	0.00450293	0.00475396	0.00385666	0.0061097	0.262998	0.297483	0.00399667	1.26213	-0.60641	-0.58403	-0.75371	-0.79191	-0.14799	-0.07768	-0.79182	17.9998	1.99993	1.99993
S06_8	-3766.88	-3765.83	-3765.78	-3765.78	-3765.92	-0.19513	-0.05151	6.3455	0.12332	-0.12332	0.07181	13.9256	0.105889	9.44382	0.615354	-0.27751	-0.263488	-0.40557	-0.437536	-0.070249	-0.029488	-0.353364	-0.746547	0.013931	0.013634	0.01208	0.01735	0.786103	0.890671	-0.013229	0.260959	0.00486964	0.00476582	0.00422262	0.00606477	0.274786	0.311338	0.00462425	1.25293	-0.60998	-0.58814	-0.753	-0.79639	-0.13575	-0.04724	-0.79714	17.9998	1.99993	1.99993
S06_9	-3766.88	-3765.83	-3765.77	-3765.77	-3765.92	-0.19227	-0.0472	5.8371	0.119735	-0.119735	0.072535	13.7864	0.0988245	10.1189	0.618393	-0.280315	-0.269077	-0.401287	-0.435888	-0.069764	-0.00759	-0.347624	-0.802839	0.013663	0.013334	0.01624	0.017437	0.808048	0.922479	-0.014618	0.279546	0.00475741	0.00464285	0.00565471	0.0060715	0.281359	0.321204	0.00508993	1.24035	-0.61528	-0.59261	-0.75227	-0.78725	-0.12683	-0.02281	-0.79045	17.9998	1.99993	1.99993
S07_1	-3958.33	-3957.23	-3957.17	-3957.17	-3957.32	-0.19334	-0.05073	5.9501	0.122035	-0.122035	0.071305	14.0243	0.104428	9.57593	0.624626	-0.280763	-0.259407	-0.39924	-0.421515	-0.067362	-0.000223	-0.351263	-0.814928	0.014349	0.011822	0.015213	0.015871	0.812606	0.932743	-0.013961	0.769381	0.013547	0.0111613	0.0143627	0.014984	0.767188	0.880611	0.0131807	1.24623	-0.61707	-0.59513	-0.75342	-0.7688	-0.12495	-0.01353	-0.7906	17.9998	1.99993	1.99993
S07_2	-3958.33	-3957.23	-3957.17	-3957.17	-3957.33	-0.19514	-0.05099	6.5917	0.123065	-0.123065	0.072075	13.8744	0.105064	9.518	0.622116	-0.280095	-0.267858	-0.400925	-0.429147	-0.068047	-0.002034	-0.350658	-0.817019	0.014155	0.012924	0.016013	0.016298	0.814452	0.930369	-0.014891	0.770067	0.0133415	0.0121813	0.0150928	0.0153614	0.767647	0.876903	0.0140352	1.24123	-0.61477	-0.59111	-0.75349	-0.78226	-0.12421	-0.01612	-0.79229	17.9998	1.99993	1.99993
S07_3	-3958.33	-3957.23	-3957.17	-3957.17	-3957.33	-0.19662	-0.05065	7.6103	0.123635	-0.123635	0.072985	13.7014	0.104717	9.5495	0.61546	-0.278556	-0.26879	-0.402941	-0.432308	-0.070932	-0.015225	-0.347098	-0.774522	0.01348	0.012995	0.015685	0.01787	0.794523	0.908801	-0.014247	0.26997	0.00469863	0.00452958	0.00546722	0.00622883	0.276942	0.316775	0.00496598	1.24212	-0.61307	-0.5906	-0.75251	-0.7862	-0.13259	-0.03309	-0.79042	17.9998	1.99993	1.99993
S07_4	-3958.33	-3957.23	-3957.17	-3957.17	-3957.32	-0.19607	-0.053	6.6757	0.124535	-0.124535	0.071535	13.9792	0.108401	9.22499	0.614901	-0.278298	-0.264316	-0.410752	-0.441382	-0.047344	-0.002947	-0.352667	-0.827943	0.015315	0.013616	0.012697	0.01639	0.829268	0.916152	-0.01441	0.287456	0.00531727	0.00472739	0.00440832	0.0056905	0.287916	0.318082	0.00500306	1.25047	-0.61238	-0.59372	-0.76239	-0.79889	-0.10875	-0.02498	-0.79774	17.9998	1.99993	1.99993
S07_5	-3958.33	-3957.23	-3957.17	-3957.17	-3957.33	-0.19453	-0.04953	5.9586	0.12203	-0.12203	0.0725	13.7931	0.102699	9.73722	0.616545	-0.277024	-0.268578	-0.40671	-0.42868	-0.066926	-0.004085	-0.349928	-0.813065	0.01466	0.012505	0.016143	0.015716	0.812952	0.928495	-0.015435	0.284185	0.00512401	0.00437079	0.00564235	0.00549311	0.284146	0.32453	0.00539489	1.24695	-0.61681	-0.59113	-0.75652	-0.78293	-0.12708	-0.01764	-0.79498	17.9998	1.99993	1.99993
S07_6	-3958.33	-3957.23	-3957.17	-3957.17	-3957.32	-0.19689	-0.05406	7.9321	0.125475	-0.125475	0.071415	14.0027	0.110229	9.07204	0.607857	-0.280785	-0.262818	-0.409301	-0.426258	-0.059026	-0.021913	-0.345247	-0.774909	0.013001	0.015969	0.015205	0.016169	0.80311	0.896535	-0.014025	0.269137	0.00451543	0.00554626	0.00528091	0.00561572	0.278931	0.311379	0.00487108	1.25305	-0.6151	-0.59082	-0.75652	-0.78512	-0.12289	-0.04399	-0.78827	17.9998	1.99993	1.99993
S07_7	-3958.33	-3957.23	-3957.17	-3957.17	-3957.33	-0.19562	-0.04975	6.7067	0.122685	-0.122685	0.072935	13.7108	0.103185	9.69132	0.622818	-0.276594	-0.269565	-0.408227	-0.44772	-0.068868	-0.007413	-0.353963	-0.798568	0.014275	0.013879	0.016479	0.017514	0.806794	0.918692	-0.014589	0.27969	0.00499966	0.00486097	0.00577159	0.00613409	0.282571	0.321762	0.00510964	1.24272	-0.60759	-0.5928	-0.75472	-0.79986	-0.12609	-0.02497	-0.79783	17.9998	1.99993	1.99993
S07_8	-3958.33	-3957.23	-3957.17	-3957.17	-3957.33	-0.19306	-0.04971	5.9779	0.121385	-0.121385	0.071675	13.9519	0.102786	9.72899	0.616193	-0.28221	-0.271496	-0.405383	-0.41873	-0.060929	0.003521	-0.351387	-0.846674	0.015323	0.012495	0.015735	0.016401	0.828733	0.942171	-0.01554	0.310601	0.00562121	0.00458377	0.00577235	0.00601667	0.304019	0.345634	0.00570082	1.24157	-0.62296	-0.59716	-0.75783	-0.77207	-0.11652	-0.00771	-0.78934	17.9998	1.99993	1.99993
S07_9	-3958.33	-3957.23	-3957.17	-3957.17	-3957.33	-0.1965	-0.05252	6.8406	0.12451	-0.12451	0.07199	13.8908	0.107673	9.28739	0.613745	-0.275995	-0.265544	-0.406738	-0.436875	-0.065534	-0.034629	-0.352884	-0.748617	0.013309	0.014546	0.012321	0.016409	0.793245	0.888175	-0.013684	0.263003	0.00467571	0.00511029	0.0043286	0.0057648	0.278682	0.312033	0.00480745	1.2502	-0.60886	-0.58885	-0.75341	-0.79372	-0.12944	-0.05188	-0.79653	17.9998	1.99993	1.99993
S08_1	-3802.53	-3801.52	-3801.47	-3801.47	-3801.62	-0.19571	-0.04935	6.0368	0.12253	-0.12253	0.07318	13.6649	0.10258	9.74849	0.614557	-0.279037	-0.266094	-0.403303	-0.431622	-0.064072	-0.034185	-0.348822	-0.754506	0.012629	0.014889	0.011849	0.01652	0.795481	0.891401	-0.013172	0.295251	0.00494193	0.00582631	0.00463671	0.00646455	0.311285	0.34882	0.00515442	1.24827	-0.61107	-0.59052	-0.75299	-0.78742	-0.12831	-0.04989	-0.79273	17.9998	1.99993	1.99993
S08_2	-3802.5	-3801.49	-3801.44	-3801.44	-3801.59	-0.20445	-0.10687	7.2645	0.15566	-0.15566	0.04879	20.496	0.248309	4.02723	0.565173	-0.24784	-0.245118	-0.408191	-0.446715	-0.032803	0.024986	-0.383839	-0.90102	0.016924	0.017599	0.016151	0.01738	0.861622	0.967587	-0.020786	0.314419	0.00590579	0.00614134	0.00563604	0.00606491	0.300671	0.337649	0.00725347	1.28339	-0.59821	-0.58474	-0.74825	-0.80441	-0.19453	-0.1061	-0.81366	17.9999	1.99993	1.99993
S08_3	-3802.53	-3801.52	-3801.47	-3801.46	-3801.61	-0.19523	-0.053	6.2731	0.124115	-0.124115	0.071115	14.0617	0.108307	9.233	0.61803	-0.279582	-0.267917	-0.409082	-0.434274	-0.059206	-0.008018	-0.354199	-0.809755	0.015188	0.013812	0.012901	0.016969	0.814976	0.920257	-0.014338	0.282341	0.00529567	0.00481589	0.00449825	0.00591666	0.284161	0.32087	0.0049993	1.24752	-0.6124	-0.59314	-0.75789	-0.79565	-0.12088	-0.02319	-0.79708	17.9998	1.99993	1.99993
S08_4	-3802.53	-3801.52	-3801.47	-3801.46	-3801.62	-0.19279	-0.05046	8.1267	0.121625	-0.121625	0.071165	14.0519	0.103932	9.62168	0.620091	-0.283541	-0.269359	-0.39811	-0.423008	-0.065396	0.002374	-0.357677	-0.831495	0.013932	0.012938	0.016171	0.017143	0.820555	0.936434	-0.014429	0.288815	0.0048392	0.00449394	0.0056169	0.00595452	0.285015	0.325265	0.00501183	1.23795	-0.61935	-0.59246	-0.75	-0.77766	-0.12121	-0.01109	-0.79625	17.9998	1.99993	1.99993
S08_5	-3802.53	-3801.53	-3801.47	-3801.47	-3801.62	-0.20135	-0.05348	8.8877	0.127415	-0.127415	0.073935	13.5254	0.10979	9.10833	0.599856	-0.278471	-0.257606	-0.397387	-0.420963	-0.09093	-0.077175	-0.341504	-0.582319	0.011197	0.014158	0.012011	0.014169	0.712998	0.81085	-0.010994	0.262682	0.00505092	0.00638662	0.00541812	0.00639158	0.321631	0.365771	0.00495935	1.26059	-0.60843	-0.583	-0.74315	-0.77208	-0.16273	-0.11209	-0.78397	17.9998	1.99993	1.99993
S08_6	-3802.53	-3801.52	-3801.47	-3801.46	-3801.62	-0.19618	-0.05319	7.4839	0.124685	-0.124685	0.071495	13.987	0.108723	9.19766	0.629538	-0.275124	-0.265895	-0.408884	-0.445404	-0.069639	-0.008509	-0.354345	-0.784393	0.015253	0.012345	0.016536	0.016104	0.800874	0.91032	-0.014346	0.273135	0.00531128	0.00429868	0.00575804	0.00560761	0.278874	0.316984	0.00499545	1.24801	-0.60817	-0.58909	-0.75485	-0.80172	-0.12768	-0.0292	-0.79768	17.9998	1.99993	1.99993
S08_7	-3802.53	-3801.52	-3801.47	-3801.46	-3801.61	-0.19963	-0.09279	6.9032	0.14621	-0.14621	0.05342	18.7196	0.200088	4.99781	0.609986	-0.281536	-0.270355	-0.409536	-0.434084	-0.024099	0.002079	-0.351518	-0.8846	0.015397	0.012971	0.012739	0.016135	0.866451	0.940233	-0.016274	0.304558	0.00530102	0.00446578	0.0043859	0.00555511	0.29831	0.323712	0.00560297	1.26609	-0.60334	-0.58015	-0.74406	-0.78095	-0.17047	-0.10675	-0.78286	17.9999	1.99993	1.99993
S08_8	-3802.53	-3801.52	-3801.47	-3801.47	-3801.62	-0.19242	-0.04905	4.5581	0.120735	-0.120735	0.071685	13.9499	0.101674	9.8354	0.631628	-0.278322	-0.274357	-0.407651	-0.436918	-0.063107	0.003083	-0.350437	-0.837196	0.015408	0.012547	0.016433	0.016418	0.825152	0.937299	-0.014535	0.291203	0.00535939	0.00436425	0.00571592	0.0057107	0.287014	0.326022	0.00505574	1.24107	-0.61002	-0.60045	-0.75694	-0.78712	-0.11704	-0.01056	-0.79355	17.9998	1.99993	1.99993
S09_1	-3442.84	-3441.9	-3441.85	-3441.85	-3441.99	-0.19392	-0.04952	6.4961	0.12172	-0.12172	0.0722	13.8504	0.102602	9.74638	0.60524	-0.304971	-0.285072	-0.409868	-0.426445	-0.058094	-0.032894	-0.344061	-0.773072	0.012812	0.015988	0.013142	0.01675	0.80469	0.896401	-0.014132	0.343957	0.00570034	0.00711342	0.00584717	0.00745245	0.358024	0.398829	0.00628764	1.24813	-0.62436	-0.59259	-0.75975	-0.77476	-0.12369	-0.04684	-0.78317	17.9998	1.99993	1.99993
S09_2	-3442.85	-3441.91	-3441.85	-3441.85	-3441.99	-0.19278	-0.04669	6.7162	0.119735	-0.119735	0.073045	13.6902	0.0981345	10.1901	0.604816	-0.309555	-0.285427	-0.41256	-0.42636	-0.05924	-0.030905	-0.345208	-0.774355	0.01363	0.015296	0.013283	0.016254	0.803734	0.898353	-0.013827	0.359608	0.00632974	0.00710342	0.00616859	0.00754832	0.373252	0.417193	0.00642122	1.24711	-0.6308	-0.59485	-0.76139	-0.77601	-0.1247	-0.04473	-0.78431	17.9998	1.99993	1.99993
S09_3	-3442.84	-3441.9	-3441.85	-3441.85	-3441.99	-0.19268	-0.05124	6.1227	0.12196	-0.12196	0.07072	14.1403	0.105163	9.50906	0.611886	-0.306626	-0.294653	-0.414243	-0.429057	-0.055138	0.00466	-0.346947	-0.85363	0.015459	0.013978	0.014791	0.017077	0.83444	0.937133	-0.014814	0.376291	0.00681452	0.00616167	0.00652006	0.00752775	0.367831	0.4131	0.00653019	1.24229	-0.63442	-0.5996	-0.76513	-0.77901	-0.11045	-0.01065	-0.7855	17.9998	1.99993	1.99993
S10_1	-3728.81	-3727.78	-3727.72	-3727.72	-3727.87	-0.19249	-0.0474	5.8457	0.119945	-0.119945	0.072545	13.7845	0.0991578	10.0849	0.611316	-0.294586	-0.302872	-0.432687	-0.408169	-0.056095	-0.002899	-0.348579	-0.835301	0.016665	0.013025	0.013197	0.017726	0.828177	0.927366	-0.015643	0.28846	0.00575504	0.00449801	0.00455741	0.00612144	0.286	0.320254	0.00540211	1.2435	-0.61971	-0.6114	-0.78375	-0.7603	-0.11327	-0.0191	-0.78974	17.9998	1.99993	1.99993
S10_10	-3728.81	-3727.77	-3727.71	-3727.71	-3727.86	-0.19196	-0.04695	6.5261	0.119455	-0.119455	0.072505	13.7922	0.0984035	10.1622	0.611431	-0.295768	-0.302105	-0.432797	-0.408236	-0.055779	-0.001955	-0.348522	-0.837678	0.016526	0.012977	0.013294	0.017734	0.829233	0.928298	-0.015638	0.289298	0.00570736	0.00448169	0.00459117	0.00612455	0.286381	0.320594	0.00540069	1.24317	-0.61934	-0.61089	-0.78333	-0.76068	-0.11254	-0.01825	-0.78994	17.9998	1.99993	1.99993
S10_11	-3728.81	-3727.77	-3727.71	-3727.71	-3727.86	-0.1938	-0.05237	5.5272	0.123085	-0.123085	0.070715	14.1413	0.10712	9.33536	0.611618	-0.288384	-0.298191	-0.435651	-0.411828	-0.054984	0.000558	-0.347553	-0.832845	0.014093	0.013541	0.013477	0.018628	0.82567	0.929559	-0.015852	0.306704	0.00518989	0.00498661	0.00496304	0.00685995	0.304061	0.34232	0.00583766	1.24583	-0.61469	-0.60877	-0.78742	-0.76254	-0.11501	-0.0162	-0.79491	17.9998	1.99993	1.99993
S10_12	-3728.81	-3727.77	-3727.71	-3727.71	-3727.86	-0.20184	-0.0971	6.2237	0.14947	-0.14947	0.05237	19.0949	0.213302	4.68818	0.612123	-0.293064	-0.298722	-0.432205	-0.411877	-0.054092	0.000771	-0.346999	-0.833782	0.014052	0.013541	0.013394	0.018529	0.826344	0.92952	-0.015816	0.287405	0.00484374	0.00466759	0.00461692	0.00638696	0.284842	0.320406	0.00545179	1.27773	-0.60701	-0.59693	-0.76853	-0.74566	-0.19746	-0.11098	-0.78306	17.9999	1.99993	1.99993
S10_2	-3728.81	-3727.77	-3727.72	-3727.71	-3727.87	-0.19354	-0.0503	5.7842	0.12192	-0.12192	0.07162	13.9626	0.103773	9.63639	0.614439	-0.288791	-0.301592	-0.430851	-0.410339	-0.058156	-0.001667	-0.348512	-0.832813	0.015222	0.013476	0.013302	0.017941	0.82617	0.928835	-0.016005	0.28748	0.0052545	0.0046518	0.00459174	0.00619308	0.285187	0.320626	0.00552479	1.2455	-0.61162	-0.6095	-0.78261	-0.7611	-0.11503	-0.0176	-0.78897	17.9998	1.99993	1.99993
S10_3	-3728.81	-3727.77	-3727.72	-3727.72	-3727.87	-0.19347	-0.05053	5.7539	0.122	-0.122	0.07147	13.9919	0.104128	9.6036	0.614259	-0.2895	-0.302346	-0.432004	-0.410331	-0.056538	-0.000391	-0.348775	-0.83921	0.015076	0.013552	0.013505	0.017975	0.829666	0.931254	-0.016102	0.323744	0.00581591	0.00522799	0.00520986	0.00693426	0.320062	0.359252	0.00621171	1.24476	-0.61254	-0.60951	-0.78357	-0.7613	-0.11297	-0.01601	-0.78959	17.9998	1.99993	1.99993
S10_4	-3728.81	-3727.78	-3727.72	-3727.72	-3727.87	-0.19197	-0.04702	6.0512	0.119495	-0.119495	0.072475	13.7979	0.0985102	10.1512	0.611655	-0.284168	-0.300729	-0.435492	-0.407633	-0.062585	-0.005798	-0.34832	-0.816213	0.016675	0.012581	0.013568	0.017327	0.816834	0.92182	-0.015383	0.282	0.00576119	0.00434672	0.00468772	0.00598645	0.282215	0.318487	0.0053148	1.24501	-0.62014	-0.6111	-0.78533	-0.75953	-0.1203	-0.02274	-0.79	17.9998	1.99993	1.99993
S10_5	-3728.81	-3727.77	-3727.72	-3727.71	-3727.87	-0.19341	-0.04902	5.1275	0.121215	-0.121215	0.072195	13.8514	0.10176	9.82708	0.613338	-0.294403	-0.302877	-0.437406	-0.409483	-0.049282	0.003591	-0.347064	-0.851164	0.015703	0.013347	0.013693	0.018286	0.836403	0.934836	-0.015312	0.293686	0.00541816	0.00460525	0.00472463	0.0063094	0.288593	0.322556	0.00528325	1.24464	-0.62436	-0.61589	-0.78884	-0.76234	-0.10807	-0.01264	-0.79764	17.9998	1.99993	1.99993
S10_6	-3728.81	-3727.78	-3727.72	-3727.72	-3727.87	-0.19468	-0.05275	4.9761	0.123715	-0.123715	0.070965	14.0915	0.107838	9.2732	0.61404	-0.293402	-0.298088	-0.437386	-0.413618	-0.050806	0.004128	-0.348579	-0.8488	0.014548	0.013729	0.014156	0.018446	0.833596	0.935489	-0.015442	0.292633	0.00501558	0.00473322	0.00488043	0.00635945	0.287391	0.32252	0.00532379	1.24469	-0.62264	-0.60971	-0.78808	-0.76474	-0.11032	-0.01177	-0.79678	17.9998	1.99993	1.99993
S10_7	-3728.81	-3727.77	-3727.71	-3727.71	-3727.87	-0.19266	-0.04777	6.1696	0.120215	-0.120215	0.072445	13.8036	0.0997422	10.0258	0.613348	-0.29367	-0.302346	-0.431522	-0.40842	-0.058272	-0.002513	-0.347881	-0.832116	0.016237	0.012804	0.01309	0.017564	0.825665	0.927811	-0.015576	0.287348	0.00560699	0.0044215	0.00452026	0.00606524	0.28512	0.320394	0.00537874	1.24401	-0.61842	-0.61185	-0.78175	-0.76049	-0.11517	-0.01828	-0.78919	17.9998	1.99993	1.99993
S10_8	-3728.81	-3727.77	-3727.71	-3727.71	-3727.87	-0.19426	-0.05323	5.2147	0.123745	-0.123745	0.070515	14.1814	0.108578	9.20993	0.613225	-0.290846	-0.297916	-0.4383	-0.412565	-0.052326	0.003313	-0.348131	-0.844027	0.014033	0.013505	0.01399	0.018477	0.830932	0.934477	-0.015684	0.29106	0.00483924	0.00465716	0.00482441	0.00637174	0.286545	0.322252	0.00540859	1.24558	-0.61877	-0.6099	-0.78897	-0.76355	-0.11236	-0.01237	-0.79668	17.9998	1.99993	1.99993
S10_9	-3728.81	-3727.77	-3727.71	-3727.71	-3727.87	-0.19361	-0.05055	5.4805	0.12208	-0.12208	0.07153	13.9801	0.104177	9.59907	0.614894	-0.289136	-0.302234	-0.431233	-0.410325	-0.056858	-0.000538	-0.348526	-0.838492	0.015205	0.013587	0.013389	0.018015	0.8293	0.930833	-0.016063	0.289579	0.00525116	0.00469237	0.00462399	0.00622161	0.286405	0.32147	0.00554747	1.24496	-0.61193	-0.60984	-0.78288	-0.76131	-0.11323	-0.01629	-0.78924	17.9998	1.99993	1.99993
S11_1	-3498.11	-3497.15	-3497.1	-3497.1	-3497.24	-0.19247	-0.04748	6.02	0.119975	-0.119975	0.072495	13.7941	0.0992758	10.0729	0.611718	-0.293011	-0.301866	-0.434466	-0.408301	-0.059094	-0.003333	-0.348892	-0.828087	0.016387	0.012792	0.013523	0.017315	0.823519	0.926209	-0.015635	0.286026	0.00566016	0.00441843	0.00467092	0.0059807	0.284448	0.319918	0.00540042	1.2439	-0.61876	-0.61138	-0.78473	-0.7604	-0.11626	-0.01965	-0.79035	17.9998	1.99993	1.99993
S11_2	-3498.11	-3497.15	-3497.1	-3497.1	-3497.24	-0.1941	-0.05209	5.2873	0.123095	-0.123095	0.071005	14.0835	0.106699	9.37213	0.614732	-0.293707	-0.298339	-0.43746	-0.413892	-0.050097	0.004572	-0.348316	-0.852297	0.014561	0.01372	0.014237	0.018378	0.835561	0.936965	-0.01545	0.293897	0.00502106	0.00473106	0.00490933	0.00633727	0.288126	0.323093	0.00532761	1.24455	-0.62261	-0.60967	-0.78832	-0.76504	-0.10933	-0.01082	-0.79677	17.9998	1.99993	1.99993
S11_3	-3498.1	-3497.15	-3497.09	-3497.09	-3497.23	-0.19259	-0.04761	6.4835	0.1201	-0.1201	0.07249	13.795	0.0994897	10.0513	0.611938	-0.293428	-0.302088	-0.434113	-0.408288	-0.058613	-0.002774	-0.348669	-0.829927	0.016333	0.012854	0.013499	0.017356	0.824431	0.926945	-0.015628	0.286598	0.00564026	0.00443886	0.00466159	0.00599353	0.2847	0.320101	0.0053968	1.24376	-0.61849	-0.61136	-0.78458	-0.7604	-0.11562	-0.01902	-0.79025	17.9998	1.99993	1.99993
S11_4	-3498.1	-3497.14	-3497.09	-3497.09	-3497.23	-0.19361	-0.05026	5.6112	0.121935	-0.121935	0.071675	13.9519	0.103719	9.64142	0.613683	-0.289009	-0.301586	-0.430708	-0.410232	-0.058167	-0.002678	-0.348671	-0.830455	0.015362	0.0135	0.013133	0.018012	0.825382	0.927126	-0.015963	0.286775	0.00530485	0.00466185	0.00453512	0.00621995	0.285023	0.320158	0.00551238	1.24545	-0.61114	-0.60946	-0.78242	-0.76086	-0.11524	-0.01906	-0.78915	17.9998	1.99993	1.99993
S11_5	-3498.1	-3497.15	-3497.09	-3497.09	-3497.23	-0.19192	-0.04733	6.9068	0.119625	-0.119625	0.072295	13.8322	0.0989705	10.104	0.611431	-0.293467	-0.30182	-0.438009	-0.408054	-0.057372	-0.001464	-0.349406	-0.834683	0.016013	0.01289	0.013701	0.01758	0.826641	0.928585	-0.015709	0.288276	0.00553043	0.00445184	0.00473193	0.00607163	0.285498	0.320707	0.00542544	1.24339	-0.6158	-0.61113	-0.78819	-0.76012	-0.11418	-0.01767	-0.79147	17.9998	1.99993	1.99993
S11_6	-3498.1	-3497.15	-3497.09	-3497.09	-3497.23	-0.19412	-0.05198	5.2738	0.12305	-0.12305	0.07107	14.0706	0.106524	9.38757	0.60895	-0.291543	-0.29787	-0.43251	-0.412893	-0.051811	-0.000942	-0.346722	-0.837721	0.015087	0.013601	0.012989	0.018609	0.82967	0.929316	-0.015809	0.288846	0.00520199	0.00468961	0.0044786	0.00641637	0.28607	0.320427	0.00545093	1.24592	-0.61946	-0.60908	-0.78387	-0.7636	-0.11276	-0.01728	-0.79409	17.9998	1.99993	1.99993
S12_1	-3689.56	-3688.55	-3688.5	-3688.49	-3688.64	-0.19473	-0.05176	4.7687	0.123245	-0.123245	0.071485	13.9889	0.106241	9.41253	0.613485	-0.289383	-0.302064	-0.430047	-0.409555	-0.058493	-0.002172	-0.348557	-0.83005	0.015168	0.013406	0.013102	0.018087	0.824663	0.927739	-0.016018	0.286553	0.00523636	0.00462807	0.00452312	0.00624406	0.284693	0.320278	0.0055298	1.24556	-0.61243	-0.61011	-0.78167	-0.76042	-0.11581	-0.01832	-0.78908	17.9998	1.99993	1.99993
S12_10	-3689.56	-3688.55	-3688.49	-3688.49	-3688.64	-0.19347	-0.04839	5.4773	0.12093	-0.12093	0.07254	13.7855	0.1008	9.92063	0.611568	-0.294648	-0.301893	-0.434737	-0.408514	-0.057344	-0.002395	-0.349081	-0.834192	0.016599	0.012881	0.013296	0.017601	0.826828	0.928111	-0.015745	0.307202	0.0061128	0.0047436	0.00489642	0.0064818	0.30449	0.341789	0.0057983	1.24378	-0.61944	-0.61149	-0.78507	-0.76072	-0.1145	-0.01828	-0.79049	17.9998	1.99993	1.99993
S12_2	-3689.56	-3688.55	-3688.5	-3688.5	-3688.65	-0.19586	-0.0543	4.6782	0.12508	-0.12508	0.07078	14.1283	0.110519	9.04825	0.615119	-0.294629	-0.298715	-0.438816	-0.414609	-0.049595	0.006024	-0.350654	-0.855229	0.014678	0.013814	0.014587	0.018497	0.836401	0.938447	-0.01548	0.294796	0.00505947	0.00476166	0.00502811	0.00637588	0.288306	0.323481	0.00533592	1.24472	-0.62453	-0.61099	-0.78942	-0.76584	-0.10885	-0.00944	-0.79786	17.9998	1.99993	1.99993
S12_3	-3689.56	-3688.55	-3688.5	-3688.5	-3688.65	-0.19366	-0.0486	5.4392	0.12113	-0.12113	0.07253	13.7874	0.101148	9.88654	0.613667	-0.294606	-0.303447	-0.432155	-0.408284	-0.057631	-0.001326	-0.348606	-0.835062	0.016261	0.013012	0.013315	0.017728	0.827126	0.928634	-0.015671	0.288427	0.00561647	0.00449428	0.00459894	0.00612317	0.285685	0.320746	0.00541269	1.24404	-0.61964	-0.61236	-0.78294	-0.76022	-0.11423	-0.01765	-0.78968	17.9998	1.99993	1.99993
S12_4	-3689.56	-3688.55	-3688.49	-3688.49	-3688.64	-0.19545	-0.05081	4.2419	0.12313	-0.12313	0.07232	13.8274	0.104819	9.54027	0.612022	-0.293925	-0.303604	-0.438937	-0.410525	-0.047787	0.004444	-0.349529	-0.857027	0.016261	0.013567	0.013649	0.018444	0.839396	0.936432	-0.015391	0.295475	0.00560627	0.00467746	0.00470573	0.00635889	0.289397	0.322851	0.00530632	1.24353	-0.62407	-0.6166	-0.79027	-0.76294	-0.10637	-0.0117	-0.79897	17.9998	1.99993	1.99993
S12_5	-3689.56	-3688.55	-3688.5	-3688.5	-3688.64	-0.19585	-0.05403	4.6514	0.12494	-0.12494	0.07091	14.1024	0.110069	9.0852	0.613198	-0.293432	-0.298624	-0.436739	-0.413065	-0.051772	0.00405	-0.349259	-0.846065	0.014475	0.013711	0.013993	0.018546	0.83183	0.93493	-0.015531	0.292099	0.00499741	0.00473364	0.004831	0.0064029	0.287184	0.322779	0.00536199	1.24461	-0.623	-0.61057	-0.78751	-0.76404	-0.11144	-0.01195	-0.79748	17.9998	1.99993	1.99993
S12_6	-3689.56	-3688.55	-3688.5	-3688.49	-3688.64	-0.19578	-0.05506	4.799	0.12542	-0.12542	0.07036	14.2126	0.111784	8.94586	0.612859	-0.291656	-0.299321	-0.440662	-0.412671	-0.050208	0.005434	-0.350356	-0.852565	0.014543	0.013755	0.014152	0.01859	0.835255	0.936994	-0.015698	0.293802	0.00501165	0.0047401	0.00487691	0.00640629	0.287837	0.322897	0.00540968	1.24453	-0.62023	-0.6115	-0.79169	-0.76407	-0.10952	-0.01054	-0.79886	17.9998	1.99993	1.99993
S12_7	-3689.56	-3688.55	-3688.49	-3688.49	-3688.65	-0.20261	-0.09749	5.8375	0.15005	-0.15005	0.05256	19.0259	0.214184	4.66889	0.615229	-0.290594	-0.301988	-0.428616	-0.409996	-0.057249	-0.000911	-0.347865	-0.83616	0.015294	0.013416	0.012855	0.018136	0.8279	0.930144	-0.015947	0.288656	0.00527974	0.00463142	0.00443775	0.00626084	0.285805	0.321101	0.00550516	1.2767	-0.59885	-0.59829	-0.76505	-0.74413	-0.19704	-0.11133	-0.77722	17.9999	1.99993	1.99993
S12_8	-3689.56	-3688.55	-3688.5	-3688.49	-3688.65	-0.19382	-0.04873	4.9875	0.121275	-0.121275	0.072545	13.7845	0.101369	9.86495	0.611872	-0.294307	-0.303466	-0.431101	-0.408295	-0.055035	-0.003033	-0.348473	-0.838362	0.016795	0.013207	0.013065	0.017978	0.830315	0.927973	-0.015661	0.28957	0.00580098	0.00456169	0.00451264	0.00620959	0.28679	0.320521	0.0054093	1.24369	-0.6201	-0.61253	-0.78254	-0.7602	-0.11226	-0.01904	-0.78938	17.9998	1.99993	1.99993
S12_9	-3689.56	-3688.55	-3688.49	-3688.49	-3688.64	-0.19432	-0.05177	4.9842	0.123045	-0.123045	0.071275	14.0302	0.106209	9.41541	0.612851	-0.287885	-0.302005	-0.431849	-0.410349	-0.057775	-0.001689	-0.349087	-0.834483	0.015068	0.01349	0.013387	0.01802	0.827048	0.929433	-0.016104	0.288107	0.00520226	0.00465745	0.00462189	0.00622144	0.28554	0.320888	0.00555994	1.2451	-0.61326	-0.60917	-0.78323	-0.7612	-0.11486	-0.01732	-0.78969	17.9998	1.99993	1.99993
S13_1	-3804.23	-3803.18	-3803.12	-3803.12	-3803.28	-0.193	-0.04869	6.6153	0.120845	-0.120845	0.072155	13.8591	0.101195	9.88187	0.613101	-0.30068	-0.298541	-0.421481	-0.406939	-0.050873	-0.02276	-0.346607	-0.812616	0.01323	0.015928	0.012181	0.017508	0.825817	0.91188	-0.01433	0.381904	0.00621769	0.00748567	0.00572469	0.00822822	0.388108	0.428555	0.00673466	1.2477	-0.61997	-0.61236	-0.77047	-0.75873	-0.11247	-0.03532	-0.78512	17.9998	1.99993	1.99993
S13_10	-3804.24	-3803.18	-3803.12	-3803.12	-3803.27	-0.19648	-0.05238	5.1023	0.12443	-0.12443	0.07205	13.8793	0.107445	9.30709	0.619642	-0.2927	-0.303665	-0.423272	-0.415428	-0.031795	-0.037227	-0.353063	-0.82893	0.013597	0.016184	0.015072	0.016881	0.850392	0.897035	-0.013675	0.394381	0.00646906	0.00769988	0.00717082	0.00803149	0.404592	0.426783	0.00650617	1.24803	-0.62181	-0.61217	-0.77753	-0.76547	-0.08782	-0.0543	-0.79673	17.9998	1.99993	1.99993
S13_11	-3804.24	-3803.18	-3803.12	-3803.12	-3803.27	-0.20373	-0.10527	3.7857	0.1545	-0.1545	0.04923	20.3128	0.242436	4.1248	0.611621	-0.296932	-0.303364	-0.424441	-0.407361	-0.03458	-0.002635	-0.347978	-0.883607	0.015952	0.016171	0.014284	0.019537	0.858711	0.938491	-0.014558	0.412591	0.00744862	0.00755088	0.00666976	0.00912259	0.400966	0.438218	0.0067977	1.27674	-0.61363	-0.59788	-0.76473	-0.74534	-0.18563	-0.11161	-0.77922	17.9999	1.99993	1.99993
S13_2	-3804.21	-3803.16	-3803.1	-3803.1	-3803.25	-0.19662	-0.09748	8.5071	0.14705	-0.14705	0.04957	20.1735	0.218113	4.58478	0.632784	-0.292932	-0.294475	-0.407868	-0.393391	-0.103138	-0.097352	-0.339649	0.185916	-0.005168	-0.004622	-0.004598	-0.006319	0.331221	0.509929	0.000823	0.173816	0.00483165	0.00432118	0.00429874	0.00590773	0.309664	0.476741	0.000769436	1.28474	-0.61815	-0.60176	-0.75383	-0.7449	-0.18712	-0.11637	-0.77646	17.9999	1.99993	1.99993
S13_3	-3804.23	-3803.18	-3803.12	-3803.12	-3803.27	-0.19678	-0.05541	3.356	0.126095	-0.126095	0.070685	14.1473	0.11247	8.89122	0.619475	-0.301816	-0.299597	-0.420523	-0.411607	-0.037684	-0.043671	-0.345057	-0.801713	0.012399	0.016001	0.014201	0.01657	0.837515	0.886736	-0.014196	0.384084	0.00594011	0.00766576	0.00680341	0.00793835	0.401237	0.424817	0.00680102	1.25101	-0.61768	-0.60922	-0.77005	-0.75999	-0.0947	-0.06233	-0.79116	17.9998	1.99993	1.99993
S13_4	-3804.23	-3803.18	-3803.12	-3803.12	-3803.27	-0.19533	-0.05082	6.4271	0.123075	-0.123075	0.072255	13.8399	0.104819	9.54022	0.623172	-0.294121	-0.301159	-0.420008	-0.40741	-0.044335	-0.05124	-0.345437	-0.777467	0.014799	0.015223	0.013505	0.016384	0.825245	0.875898	-0.014029	0.371312	0.00706788	0.00727038	0.00644988	0.00782486	0.39413	0.418322	0.00670013	1.25191	-0.61005	-0.60739	-0.76787	-0.75633	-0.10142	-0.07099	-0.78463	17.9998	1.99993	1.99993
S13_5	-3804.24	-3803.18	-3803.12	-3803.12	-3803.27	-0.19509	-0.05024	5.2486	0.122665	-0.122665	0.072425	13.8074	0.103878	9.62669	0.613967	-0.27628	-0.298268	-0.419555	-0.406378	-0.057598	-0.044228	-0.344943	-0.75104	0.012817	0.015738	0.012034	0.016899	0.800523	0.879425	-0.013408	0.366768	0.00625915	0.00768561	0.00587677	0.00825258	0.390933	0.429465	0.00654776	1.25443	-0.6113	-0.61004	-0.76876	-0.75601	-0.12276	-0.06188	-0.78293	17.9998	1.99993	1.99993
S13_6	-3804.23	-3803.18	-3803.12	-3803.12	-3803.27	-0.19667	-0.05112	3.4749	0.123895	-0.123895	0.072775	13.741	0.105462	9.4821	0.614964	-0.277878	-0.300494	-0.418494	-0.408103	-0.053551	-0.034921	-0.346014	-0.779196	0.012501	0.016565	0.01186	0.017526	0.814341	0.891119	-0.013882	0.370833	0.00594944	0.00788356	0.00564437	0.00834092	0.387559	0.424099	0.00660668	1.2526	-0.61	-0.61213	-0.76796	-0.75738	-0.11523	-0.05241	-0.78393	17.9998	1.99993	1.99993
S13_7	-3804.24	-3803.18	-3803.12	-3803.12	-3803.28	-0.1936	-0.04901	6.4564	0.121305	-0.121305	0.072295	13.8322	0.10177	9.82609	0.612077	-0.300219	-0.299065	-0.421188	-0.407363	-0.050944	-0.023595	-0.347009	-0.811073	0.013227	0.016112	0.012181	0.017673	0.825167	0.910873	-0.014411	0.304453	0.00496502	0.00604796	0.00457238	0.00663392	0.309743	0.341915	0.00540946	1.24768	-0.62043	-0.61198	-0.77069	-0.75859	-0.11272	-0.0362	-0.78513	17.9998	1.99993	1.99993
S13_8	-3804.24	-3803.18	-3803.12	-3803.12	-3803.28	-0.1958	-0.05112	4.0305	0.12346	-0.12346	0.07234	13.8236	0.105352	9.49196	0.628055	-0.296876	-0.300724	-0.415255	-0.408497	-0.041701	-0.050839	-0.346345	-0.785229	0.0145	0.015598	0.013751	0.016538	0.830972	0.876951	-0.013662	0.378892	0.00699661	0.00752642	0.0066352	0.00797999	0.400964	0.42315	0.00659225	1.25255	-0.61011	-0.6089	-0.76463	-0.75725	-0.0976	-0.07057	-0.7842	17.9998	1.99993	1.99993
S13_9	-3804.24	-3803.18	-3803.12	-3803.12	-3803.28	-0.19626	-0.05289	2.9462	0.124575	-0.124575	0.071685	13.9499	0.108244	9.23839	0.608186	-0.30796	-0.2972	-0.424156	-0.412099	-0.041333	-0.011187	-0.345557	-0.845761	0.013	0.016666	0.012525	0.01929	0.840104	0.925766	-0.014718	0.397015	0.00610242	0.0078233	0.00587945	0.00905505	0.394359	0.43457	0.00690888	1.2468	-0.62694	-0.61289	-0.77504	-0.76266	-0.10437	-0.0235	-0.79356	17.9998	1.99993	1.99993
[truncated: 467 more columns]

## Sheet: lit_distributions
	BOLTZ_HOMO	BOLTZ_LUMO	BOLTZ_Dipole	BOLTZ_Electronegativity	BOLTZ_Chemical_potential	BOLTZ_Hardness	BOLTZ_Softness	BOLTZ_Electrophilicity_index	BOLTZ_Nucleophilicity_index	BOLTZ_Mulliken_Charge_Co	BOLTZ_Mulliken_Charge_N1	BOLTZ_Mulliken_Charge_N2	BOLTZ_Mulliken_Charge_O1	BOLTZ_Mulliken_Charge_O2	BOLTZ_Mulliken_Charge_O3	BOLTZ_Mulliken_Charge_O4	BOLTZ_Mulliken_Charge_O5	BOLTZ_Mulliken_Spin_Co	BOLTZ_Mulliken_Spin_N1	BOLTZ_Mulliken_Spin_N2	BOLTZ_Mulliken_Spin_O1	BOLTZ_Mulliken_Spin_O2	BOLTZ_Mulliken_Spin_O3	BOLTZ_Mulliken_Spin_O4	BOLTZ_Mulliken_Spin_O5	BOLTZ_Mulliken_SpinFrac_Co	BOLTZ_Mulliken_SpinFrac_N1	BOLTZ_Mulliken_SpinFrac_N2	BOLTZ_Mulliken_SpinFrac_O1	BOLTZ_Mulliken_SpinFrac_O2	BOLTZ_Mulliken_SpinFrac_O3	BOLTZ_Mulliken_SpinFrac_O4	BOLTZ_Mulliken_SpinFrac_O5	BOLTZ_NPA_Charge_Co	BOLTZ_NPA_Charge_N1	BOLTZ_NPA_Charge_N2	BOLTZ_NPA_Charge_O1	BOLTZ_NPA_Charge_O2	BOLTZ_NPA_Charge_O3	BOLTZ_NPA_Charge_O4	BOLTZ_NPA_Charge_O5	BOLTZ_NPA_Core_Co	BOLTZ_NPA_Core_N1	BOLTZ_NPA_Core_N2	BOLTZ_NPA_Core_O1	BOLTZ_NPA_Core_O2	BOLTZ_NPA_Core_O3	BOLTZ_NPA_Core_O4	BOLTZ_NPA_Core_O5
S01	-0.19374	-0.048397	6.21855	0.121068	-0.121068	0.0726714	13.7612	0.100856	9.91678	0.621069	-0.27991	-0.271137	-0.403018	-0.432665	-0.0656154	-0.00905149	-0.349408	-0.807254	0.0140999	0.014017	0.0157734	0.0177369	0.812037	0.920764	-0.0143805	0.294755	0.00514859	0.00512018	0.00575867	0.00647884	0.296517	0.336206	0.00525026	1.2421	-0.613513	-0.595344	-0.754153	-0.785318	-0.123095	-0.0248741	-0.791867	17.9998	1.99993	1.99993	1.99994	1.99994	1.99996	1.99997	1.99995
S02	-0.195826	-0.0606254	6.77851	0.128226	-0.128226	0.0676001	15.0871	0.128311	8.54432	0.622073	-0.280519	-0.271262	-0.403243	-0.426976	-0.0658385	-9.1008e-05	-0.352196	-0.825316	0.0144182	0.013233	0.0162456	0.0167931	0.817946	0.932889	-0.0147847	0.297311	0.00519266	0.0047738	0.00585673	0.00605779	0.294798	0.336223	0.00532906	1.24926	-0.612405	-0.592719	-0.750254	-0.776437	-0.143032	-0.0392828	-0.792488	17.9998	1.99993	1.99993	1.99994	1.99994	1.99996	1.99997	1.99995
S03	-0.196108	-0.0561184	7.11798	0.126113	-0.126113	0.069995	14.4423	0.117236	8.97965	0.620437	-0.280349	-0.267851	-0.405999	-0.432411	-0.066572	-0.00708629	-0.349753	-0.804043	0.0144549	0.0132978	0.0155259	0.0171326	0.809287	0.920398	-0.0142818	0.454912	0.00810612	0.00740151	0.00888832	0.00964815	0.456381	0.519715	0.00807055	1.24771	-0.612461	-0.590607	-0.752669	-0.785818	-0.13423	-0.0354189	-0.791939	17.9998	1.99993	1.99993	1.99994	1.99994	1.99996	1.99997	1.99995
S04	-0.195134	-0.0559268	6.41958	0.12553	-0.12553	0.0696036	14.5411	0.117128	9.03681	0.620273	-0.28038	-0.269686	-0.402938	-0.427862	-0.0650187	-0.00908612	-0.353097	-0.807383	0.0143635	0.0133803	0.0150338	0.0165753	0.813184	0.921188	-0.014417	0.36677	0.00647686	0.00605305	0.00686721	0.00757617	0.368937	0.418343	0.00655514	1.24906	-0.613292	-0.592734	-0.752056	-0.77889	-0.135427	-0.0380231	-0.793994	17.9998	1.99993	1.99993	1.99994	1.99994	1.99996	1.99997	1.99995
S05	-0.193714	-0.0525539	7.39546	0.123134	-0.123134	0.07058	14.1766	0.107428	9.31173	0.62141	-0.279817	-0.26548	-0.40439	-0.433894	-0.0692031	-0.0157771	-0.350471	-0.776912	0.014191	0.0130278	0.0144954	0.0170824	0.799119	0.906029	-0.0134665	0.27464	0.00502134	0.00459577	0.00512938	0.00603841	0.282446	0.320245	0.00475932	1.24791	-0.612286	-0.589882	-0.754518	-0.789315	-0.128481	-0.0354743	-0.79358	17.9998	1.99993	1.99993	1.99994	1.99994	1.99996	1.99997	1.99995
S06	-0.195479	-0.0513106	6.63022	0.123395	-0.123395	0.0720844	13.8743	0.10566	9.47531	0.619622	-0.277236	-0.265734	-0.405358	-0.436411	-0.0717152	-0.0165737	-0.350548	-0.768422	0.0140561	0.0129799	0.0147224	0.0170296	0.793442	0.904379	-0.0138997	0.278296	0.00509831	0.00468185	0.00534464	0.00615339	0.287077	0.327214	0.00503369	1.24898	-0.610357	-0.589926	-0.754387	-0.791473	-0.132486	-0.0360923	-0.794664	17.9998	1.99993	1.99993	1.99994	1.99994	1.99996	1.99997	1.99995
S07	-0.195308	-0.0512148	6.69362	0.123261	-0.123261	0.0720465	13.8809	0.105463	9.48738	0.617141	-0.278924	-0.266488	-0.405579	-0.431403	-0.0638889	-0.00944094	-0.350567	-0.801799	0.0142074	0.0134165	0.0150546	0.0165156	0.810628	0.918015	-0.0145314	0.389233	0.00687042	0.00634059	0.00734667	0.00792029	0.391962	0.445253	0.00700697	1.24606	-0.614289	-0.592369	-0.755644	-0.78554	-0.123616	-0.0259907	-0.793112	17.9998	1.99993	1.99993	1.99994	1.99994	1.99996	1.99997	1.99995
S08	-0.197208	-0.0634544	6.941	0.130331	-0.130331	0.0668771	15.2988	0.135246	8.22798	0.611179	-0.275473	-0.264618	-0.405263	-0.434104	-0.0586997	-0.0119786	-0.355248	-0.797995	0.0144871	0.0139017	0.0143465	0.0163531	0.812183	0.914214	-0.01485	0.289012	0.00524965	0.00509756	0.00520778	0.00595808	0.295864	0.333133	0.00537619	1.25406	-0.60889	-0.589202	-0.751021	-0.788351	-0.142775	-0.0560283	-0.794694	17.9998	1.99993	1.99993	1.99994	1.99994	1.99996	1.99997	1.99995
S09	-0.193127	-0.0491489	6.44516	0.121138	-0.121138	0.071989	13.8935	0.101965	9.81534	0.607312	-0.307051	-0.288381	-0.412223	-0.427286	-0.0574918	-0.0197246	-0.345405	-0.800327	0.0139663	0.0150878	0.0137382	0.0166935	0.814278	0.910616	-0.0142574	0.359945	0.0062813	0.00679314	0.00617845	0.0075095	0.366369	0.409706	0.00641297	1.24584	-0.629858	-0.595678	-0.762089	-0.776592	-0.119618	-0.0340845	-0.784326	17.9998	1.99993	1.99993	1.99994	1.99994	1.99996	1.99997	1.99995
S10	-0.193974	-0.0537454	5.72321	0.12386	-0.12386	0.0701141	14.3723	0.112199	9.30016	0.612974	-0.29131	-0.300835	-0.433961	-0.410235	-0.0554806	-0.000283121	-0.34812	-0.836873	0.0153365	0.0133054	0.0135046	0.0180539	0.828167	0.930009	-0.0157096	0.293285	0.00537167	0.00466418	0.00473266	0.00632783	0.290234	0.325928	0.00550711	1.24745	-0.616766	-0.609609	-0.783756	-0.760296	-0.12047	-0.0243449	-0.791312	17.9998	1.99993	1.99993	1.99994	1.99994	1.99996	1.99997	1.99995
S11	-0.193135	-0.0494581	5.93036	0.121297	-0.121297	0.0718384	13.9212	0.102446	9.7716	0.612076	-0.292362	-0.300594	-0.434546	-0.410277	-0.0558582	-0.00110217	-0.348446	-0.835531	0.0156239	0.0132261	0.0135139	0.0178749	0.827535	0.929192	-0.0156989	0.288404	0.00539314	0.00456524	0.00466468	0.00616987	0.285644	0.320734	0.00541888	1.24449	-0.617713	-0.610347	-0.785353	-0.761737	-0.113898	-0.0172488	-0.792015	17.9998	1.99993	1.99993	1.99994	1.99994	1.99996	1.99997	1.99995
S12	-0.195555	-0.0560954	4.98657	0.125825	-0.125825	0.0697299	14.4675	0.116718	8.97871	0.613187	-0.292507	-0.301513	-0.434365	-0.410586	-0.0542893	0.000842411	-0.349147	-0.841919	0.0155142	0.0134259	0.0135401	0.0181627	0.830676	0.931883	-0.0157246	0.292467	0.00539231	0.00466291	0.00470323	0.00630846	0.288571	0.323732	0.00546288	1.24763	-0.617555	-0.61036	-0.783938	-0.760377	-0.120491	-0.0245603	-0.79187	17.9998	1.99993	1.99993	1.99994	1.99994	1.99996	1.99997	1.99995
S13	-0.196303	-0.060356	5.08332	0.12833	-0.12833	0.0679736	15.027	0.128176	8.54997	0.617899	-0.294407	-0.299691	-0.419669	-0.407703	-0.049724	-0.0380927	-0.346157	-0.718241	0.0119127	0.014161	0.0115609	0.0153385	0.78591	0.864364	-0.0127452	0.357985	0.00620528	0.0071807	0.00597625	0.0079393	0.380255	0.424164	0.00603902	1.2558	-0.61637	-0.608802	-0.768338	-0.756618	-0.120087	-0.0631576	-0.785743	17.9998	1.99993	1.99993	1.99994	1.99994	1.99996	1.99997	1.99995
[truncated: 1,923 more columns]

## Sheet: syn_descriptors_G1
	EE	Zero_Point	Thermal	Enthalpy	Gibbs	HOMO	LUMO	Dipole	Electronegativity	Chemical_potential	Hardness	Softness	Electrophilicity_index	Nucleophilicity_index	Mulliken_Charge_Co	Mulliken_Charge_N1	Mulliken_Charge_N2	Mulliken_Charge_O1	Mulliken_Charge_O2	Mulliken_Charge_O3	Mulliken_Charge_O4	Mulliken_Charge_O5	Mulliken_Spin_Co	Mulliken_Spin_N1	Mulliken_Spin_N2	Mulliken_Spin_O1	Mulliken_Spin_O2	Mulliken_Spin_O3	Mulliken_Spin_O4	Mulliken_Spin_O5	Mulliken_SpinFrac_Co	Mulliken_SpinFrac_N1	Mulliken_SpinFrac_N2	Mulliken_SpinFrac_O1	Mulliken_SpinFrac_O2	Mulliken_SpinFrac_O3	Mulliken_SpinFrac_O4	Mulliken_SpinFrac_O5	NPA_Charge_Co	NPA_Charge_N1	NPA_Charge_N2	NPA_Charge_O1	NPA_Charge_O2	NPA_Charge_O3	NPA_Charge_O4	NPA_Charge_O5	NPA_Core_Co	NPA_Core_N1	NPA_Core_N2
4a_meoh_1	-2988.29	-2987.74	-2987.71	-2987.71	-2987.81	-0.19958	-0.05308	7.1264	0.12633	-0.12633	0.07325	13.6519	0.108937	9.17962	0.609328	-0.28358	-0.270433	-0.406227	-0.420836	-0.063541	-0.06505	-0.354353	-0.705032	0.015102	0.013663	0.014432	0.01454	0.783397	0.851811	-0.013529	0.341336	0.00731151	0.00661483	0.00698714	0.00703943	0.379276	0.412398	0.00654996	1.24736	-0.60118	-0.59094	-0.74708	-0.79242	-0.14097	-0.04507	-0.7968	17.9998	1.99993	1.99993
4a_meoh_2	-2988.29	-2987.74	-2987.71	-2987.71	-2987.81	-0.19963	-0.05317	5.9211	0.1264	-0.1264	0.07323	13.6556	0.109088	9.16695	0.614502	-0.271058	-0.269571	-0.402408	-0.450708	-0.078345	-0.023991	-0.353287	-0.740302	0.013312	0.013571	0.015594	0.017774	0.777191	0.891761	-0.013974	0.691578	0.0124359	0.0126778	0.0145677	0.0166042	0.726039	0.833069	0.0130543	1.25238	-0.60781	-0.58504	-0.74721	-0.77052	-0.12624	-0.08747	-0.79253	17.9998	1.99993	1.99993
4a_meoh_3	-2988.29	-2987.74	-2987.71	-2987.71	-2987.81	-0.20411	-0.09943	7.5136	0.15177	-0.15177	0.05234	19.1058	0.220043	4.54456	0.620757	-0.279458	-0.276929	-0.405301	-0.443169	-0.062711	0.007976	-0.355911	-0.848494	0.014984	0.012793	0.015988	0.016777	0.828592	0.946549	-0.015822	0.793565	0.014014	0.0119648	0.014953	0.0156909	0.774951	0.885272	0.0147977	1.26591	-0.59573	-0.58605	-0.73469	-0.77325	-0.20024	-0.09921	-0.78344	17.9999	1.99993	1.99993
4a_meoh_4	-2988.29	-2987.74	-2987.71	-2987.71	-2987.81	-0.19884	-0.05411	6.6658	0.126475	-0.126475	0.072365	13.8188	0.110523	9.04793	0.604253	-0.284129	-0.268127	-0.41362	-0.436303	-0.068129	-0.034501	-0.356115	-0.755658	0.013113	0.015528	0.012901	0.01843	0.789581	0.891769	-0.013975	0.270783	0.00469892	0.00556431	0.00462295	0.00660421	0.282939	0.319557	0.0050078	1.24771	-0.61169	-0.58854	-0.75575	-0.785	-0.13551	-0.04855	-0.79459	17.9998	1.99993	1.99993
4a_meoh_5	-2988.29	-2987.74	-2987.71	-2987.71	-2987.81	-0.19756	-0.05232	7.3942	0.12494	-0.12494	0.07262	13.7703	0.107477	9.30429	0.613042	-0.279159	-0.269543	-0.398736	-0.434688	-0.066424	-0.000756	-0.347738	-0.823436	0.01352	0.013649	0.015151	0.018161	0.816257	0.934324	-0.015184	0.767186	0.0125964	0.0127166	0.014116	0.0169204	0.760497	0.870499	0.0141468	1.23784	-0.61386	-0.59237	-0.7523	-0.78014	-0.12296	-0.01432	-0.78966	17.9998	1.99993	1.99993
4a_meoh_6	-2988.29	-2987.74	-2987.71	-2987.71	-2987.81	-0.19801	-0.05237	7.4365	0.12519	-0.12519	0.07282	13.7325	0.107611	9.29269	0.613909	-0.278194	-0.268848	-0.401952	-0.438373	-0.067764	-0.005337	-0.3483	-0.807259	0.013494	0.013863	0.015558	0.017628	0.809552	0.925136	-0.014921	0.28714	0.00479977	0.00493103	0.00553393	0.00627023	0.287955	0.329068	0.00530735	1.23946	-0.61193	-0.59081	-0.75227	-0.78288	-0.1252	-0.02121	-0.79146	17.9998	1.99993	1.99993
4b_meoh	-3105.59	-3104.91	-3104.87	-3104.87	-3104.98	-0.193	-0.04067	4.3338	0.116835	-0.116835	0.076165	13.1294	0.0896108	11.1594	0.604352	-0.294642	-0.267978	-0.396998	-0.423646	-0.06417	-0.076724	-0.347453	-0.68606	0.015113	0.01382	0.015042	0.013517	0.7783	0.842305	-0.01284	0.33026	0.00727519	0.00665276	0.00724102	0.0065069	0.374663	0.405474	0.006181	1.2511	-0.62632	-0.58568	-0.74423	-0.77069	-0.12587	-0.09783	-0.78738	17.9998	1.99993	1.99993
4c_meoh	-2831.31	-2830.88	-2830.85	-2830.85	-2830.94	-0.19598	-0.04002	6.8287	0.118	-0.118	0.07798	12.8238	0.0892793	11.2008	0.607377	-0.284161	-0.277361	-0.394887	-0.426484	-0.071534	0.003233	-0.355804	-0.82971	0.01454	0.013578	0.01628	0.016247	0.817752	0.942815	-0.01563	0.303611	0.00532054	0.00496852	0.00595725	0.00594518	0.299236	0.344999	0.0057194	1.23815	-0.6188	-0.60104	-0.74525	-0.77821	-0.12576	-0.00647	-0.79462	17.9998	1.99993	1.99993
4d_meoh_1	-3142.44	-3141.86	-3141.82	-3141.82	-3141.93	-0.19791	-0.05652	7.2514	0.127215	-0.127215	0.070695	14.1453	0.114461	8.73659	0.620971	-0.281216	-0.283483	-0.397776	-0.389049	-0.046585	-0.023292	-0.351695	-0.821541	0.013098	0.018243	0.013266	0.017428	0.833739	0.910704	-0.016406	0.302013	0.00481506	0.00670646	0.00487682	0.00640685	0.306498	0.334791	0.00603114	1.24737	-0.61385	-0.60374	-0.75092	-0.75006	-0.10825	-0.03749	-0.78124	17.9998	1.99993	1.99993
4d_meoh_2	-3142.45	-3141.86	-3141.82	-3141.82	-3141.93	-0.20204	-0.09919	8.6552	0.150615	-0.150615	0.051425	19.4458	0.220563	4.53386	0.660369	-0.272504	-0.271357	-0.372918	-0.392387	-0.126622	-0.084106	-0.351769	0.199155	-0.003338	-0.006157	-0.004933	-0.005686	0.318519	0.506331	0.001061	0.187304	0.00313937	0.00579062	0.00463945	0.00534764	0.299565	0.476201	0.000997863	1.27732	-0.59529	-0.59126	-0.72752	-0.72948	-0.19912	-0.10669	-0.77307	17.9999	1.99993	1.99993
4e_meoh	-3599.91	-3599.51	-3599.48	-3599.48	-3599.57	-0.20282	-0.06073	6.6721	0.131775	-0.131775	0.071045	14.0756	0.122209	8.18272	0.607862	-0.279005	-0.270552	-0.39341	-0.420666	-0.064405	0.012861	-0.352891	-0.860977	0.014119	0.013312	0.016227	0.016635	0.832593	0.956098	-0.016777	0.317266	0.00520279	0.00490542	0.00597958	0.00612993	0.306807	0.352318	0.00618225	1.2354	-0.61213	-0.59036	-0.74317	-0.77214	-0.11724	0.00425	-0.79163	17.9998	1.99993	1.99993
4f_meoh_1	-3136.23	-3135.72	-3135.68	-3135.68	-3135.79	-0.22119	-0.1062	8.0829	0.163695	-0.163695	0.057495	17.3928	0.233029	4.2913	0.611618	-0.27759	-0.271343	-0.384182	-0.412569	-0.062257	0.017176	-0.355602	-0.86983	0.014595	0.013605	0.015493	0.015904	0.837366	0.961682	-0.01697	0.316437	0.00530954	0.00494938	0.00563622	0.00578574	0.304627	0.349852	0.00617354	1.26215	-0.59438	-0.57926	-0.71834	-0.75068	-0.19895	-0.08868	-0.78005	17.9999	1.99993	1.99993
4f_meoh_2	-3136.23	-3135.72	-3135.68	-3135.68	-3135.79	-0.2107	-0.05943	4.3498	0.135065	-0.135065	0.075635	13.2214	0.120596	8.29215	0.609372	-0.277773	-0.269943	-0.385172	-0.409581	-0.062318	0.015667	-0.3517	-0.867244	0.014192	0.013614	0.015403	0.015997	0.836464	0.959908	-0.016907	0.368683	0.00603331	0.00578759	0.00654813	0.00680065	0.355598	0.408076	0.00718751	1.2333	-0.61113	-0.59024	-0.73655	-0.76181	-0.1147	0.00732	-0.7893	17.9998	1.99993	1.99993
4g_meoh	-2995.05	-2994.4	-2994.36	-2994.36	-2994.48	-0.19327	-0.04838	6.0019	0.120825	-0.120825	0.072445	13.8036	0.100757	9.92487	0.605867	-0.277774	-0.270688	-0.395254	-0.428062	-0.069906	0.005534	-0.356419	-0.839484	0.014149	0.013038	0.017075	0.017228	0.821304	0.945956	-0.016006	0.307076	0.00517559	0.00476919	0.0062459	0.00630186	0.300426	0.346023	0.00585486	1.23722	-0.61217	-0.5939	-0.74625	-0.78048	-0.12387	-0.00385	-0.79573	17.9998	1.99993	1.99993
4h_meoh	-3230.58	-3229.77	-3229.72	-3229.72	-3229.84	-0.19302	-0.04691	6.0316	0.119965	-0.119965	0.073055	13.6883	0.0984984	10.1524	0.619466	-0.278009	-0.269416	-0.399693	-0.437008	-0.068699	-0.006121	-0.349737	-0.809796	0.013801	0.013773	0.01561	0.017045	0.81081	0.926922	-0.014056	0.300761	0.00512574	0.00511534	0.00579761	0.00633057	0.301137	0.344262	0.00522044	1.24052	-0.6123	-0.59365	-0.75407	-0.787	-0.12638	-0.01895	-0.79218	17.9998	1.99993	1.99993
4i_meoh	-2681.02	-2680.6	-2680.57	-2680.57	-2680.66	-0.20712	-0.0936	7.2983	0.15036	-0.15036	0.05676	17.618	0.199155	5.0212	0.607551	-0.280037	-0.272973	-0.393745	-0.425512	-0.068175	0.00734	-0.356015	-0.845231	0.01443	0.013254	0.016645	0.016844	0.824817	0.948637	-0.016117	0.312737	0.00533913	0.00490401	0.00615869	0.00623232	0.305184	0.350998	0.00596332	1.26532	-0.59906	-0.58332	-0.72683	-0.76226	-0.20421	-0.09649	-0.7828	17.9999	1.99993	1.99993
4j_meoh	-3309.08	-3308.21	-3308.16	-3308.16	-3308.29	-0.19274	-0.04809	6.3586	0.120415	-0.120415	0.072325	13.8265	0.10024	9.97602	0.627588	-0.279808	-0.269203	-0.407622	-0.429015	-0.064623	-0.001681	-0.34501	-0.820762	0.014834	0.013371	0.014654	0.016711	0.816734	0.928396	-0.014537	0.446226	0.00806484	0.00726945	0.00796698	0.00908531	0.444036	0.504744	0.00790337	1.24552	-0.61805	-0.59764	-0.76099	-0.77766	-0.12035	-0.01647	-0.78553	17.9998	1.99993	1.99993
4k_meoh	-3089.56	-3089.13	-3089.1	-3089.09	-3089.19	-0.23063	-0.07965	8.0271	0.15514	-0.15514	0.07549	13.2468	0.159415	6.27295	0.61342	-0.276001	-0.268789	-0.378955	-0.40143	-0.057295	0.025498	-0.352308	-0.889604	0.014093	0.01357	0.014483	0.015265	0.846697	0.972401	-0.017963	0.31783	0.00503503	0.00484818	0.00517436	0.00545375	0.302501	0.347411	0.00641767	1.23203	-0.60597	-0.58551	-0.73066	-0.75343	-0.1087	0.01803	-0.7889	17.9998	1.99993	1.99993
4l_meoh	-4518.8	-4518.42	-4518.38	-4518.38	-4518.48	-0.21601	-0.11171	9.6758	0.16386	-0.16386	0.05215	19.1755	0.257431	3.88453	0.612378	-0.278007	-0.273245	-0.371597	-0.404291	-0.058691	0.027451	-0.360364	-0.892529	0.014814	0.013579	0.014946	0.015551	0.846614	0.974321	-0.018159	0.320315	0.00531653	0.0048733	0.0053639	0.00558102	0.303837	0.349669	0.006517	1.26201	-0.59065	-0.57775	-0.71587	-0.75018	-0.19508	-0.07992	-0.78287	17.9999	1.99993	1.99993
4m_meoh	-2909.77	-2909.28	-2909.25	-2909.25	-2909.34	-0.18696	-0.04334	3.7115	0.11515	-0.11515	0.07181	13.9256	0.0923236	10.8315	0.607633	-0.281925	-0.275807	-0.378196	-0.41555	-0.0648	0.011597	-0.36021	-0.862032	0.01529	0.014057	0.016171	0.01652	0.83326	0.955096	-0.016199	0.313806	0.00556602	0.00511717	0.00588673	0.00601378	0.303332	0.347684	0.00589692	1.23587	-0.61471	-0.59799	-0.72995	-0.76567	-0.11676	0.00314	-0.79801	17.9998	1.99993	1.99993
[truncated: 428 more columns]

## Sheet: syn_descriptors_G2
	EE	Zero_Point	Thermal	Enthalpy	Gibbs	HOMO	LUMO	Dipole	Electronegativity	Chemical_potential	Hardness	Softness	Electrophilicity_index	Nucleophilicity_index	Mulliken_Charge_Co	Mulliken_Charge_N1	Mulliken_Charge_N2	Mulliken_Charge_N3	Mulliken_Charge_O1	Mulliken_Charge_O2	Mulliken_Charge_O3	Mulliken_Charge_O4	Mulliken_Spin_Co	Mulliken_Spin_N1	Mulliken_Spin_N2	Mulliken_Spin_N3	Mulliken_Spin_O1	Mulliken_Spin_O2	Mulliken_Spin_O3	Mulliken_Spin_O4	Mulliken_SpinFrac_Co	Mulliken_SpinFrac_N1	Mulliken_SpinFrac_N2	Mulliken_SpinFrac_N3	Mulliken_SpinFrac_O1	Mulliken_SpinFrac_O2	Mulliken_SpinFrac_O3	Mulliken_SpinFrac_O4	NPA_Charge_Co	NPA_Charge_N1	NPA_Charge_N2	NPA_Charge_N3	NPA_Charge_O1	NPA_Charge_O2	NPA_Charge_O3	NPA_Charge_O4	NPA_Core_Co	NPA_Core_N1	NPA_Core_N2
4a_py_1	-3120.64	-3120.06	-3120.02	-3120.02	-3120.12	-0.19491	-0.05228	8.0184	0.123595	-0.123595	0.071315	14.0223	0.1071	9.33704	0.586654	-0.275757	-0.252829	-0.184558	-0.383632	-0.375621	-0.099725	-0.117282	-0.504668	0.011198	0.009683	-0.023046	0.009887	0.013196	0.687865	0.775708	0.212718	0.00471998	0.0040814	0.00971393	0.00416739	0.00556214	0.289936	0.326962	1.26326	-0.60436	-0.58503	-0.72226	-0.72418	-0.17707	-0.14693	-0.54925	17.9998	1.99993	1.99993
4a_py_2	-3120.64	-3120.06	-3120.02	-3120.02	-3120.12	-0.19175	-0.05343	9.2153	0.12259	-0.12259	0.06916	14.4592	0.108649	9.20396	0.593708	-0.25813	-0.256391	-0.183733	-0.373912	-0.408744	-0.114992	-0.069231	-0.546644	0.010107	0.009588	-0.023358	0.012304	0.014859	0.68365	0.819484	0.220443	0.00407581	0.00386652	0.0094195	0.00496179	0.00599214	0.275693	0.33047	1.26153	-0.59932	-0.59455	-0.72087	-0.74296	-0.19467	-0.09859	-0.55382	17.9998	1.99993	1.99993
4a_py_3	-3120.64	-3120.06	-3120.02	-3120.02	-3120.13	-0.19124	-0.05054	9.2591	0.12089	-0.12089	0.07035	14.2146	0.103869	9.6275	0.59527	-0.270033	-0.261672	-0.183527	-0.387415	-0.399185	-0.09211	-0.035756	-0.694373	0.013012	0.009004	-0.028273	0.013842	0.015838	0.759643	0.886195	0.249757	0.00468026	0.00323863	0.0101694	0.0049788	0.00569673	0.273234	0.318753	1.2494	-0.61529	-0.59822	-0.7306	-0.74272	-0.16128	-0.05203	-0.55542	17.9998	1.99993	1.99993
4a_py_4	-3120.64	-3120.06	-3120.02	-3120.02	-3120.13	-0.19327	-0.0517	8.9559	0.122485	-0.122485	0.070785	14.1273	0.105973	9.43638	0.589982	-0.274302	-0.251206	-0.187344	-0.394485	-0.398127	-0.102859	-0.077596	-0.580341	0.010946	0.01164	-0.025096	0.011097	0.015496	0.707081	0.826462	0.231353	0.00436363	0.00464029	0.0100045	0.00442382	0.00617749	0.281878	0.329469	1.26245	-0.60947	-0.59143	-0.73227	-0.74328	-0.18315	-0.09903	-0.55323	17.9998	1.99993	1.99993
4a_py_5	-3120.64	-3120.06	-3120.02	-3120.02	-3120.13	-0.19207	-0.05125	9.1603	0.12166	-0.12166	0.07041	14.2025	0.105107	9.51412	0.60681	-0.272757	-0.261775	-0.183386	-0.381801	-0.407263	-0.083612	-0.021169	-0.741996	0.01172	0.010933	-0.027886	0.012885	0.017928	0.782395	0.904918	0.270634	0.00427472	0.00398767	0.0101711	0.00469964	0.00653901	0.285369	0.330057	1.24886	-0.61122	-0.59958	-0.73264	-0.75041	-0.14757	-0.03707	-0.5627	17.9998	1.99993	1.99993
4a_py_6	-3120.64	-3120.06	-3120.02	-3120.02	-3120.13	-0.19213	-0.05109	9.3986	0.12161	-0.12161	0.07052	14.1804	0.104857	9.53682	0.610413	-0.279423	-0.253628	-0.179954	-0.387713	-0.413169	-0.088424	-0.028148	-0.712875	0.011558	0.010588	-0.026102	0.013003	0.017193	0.76804	0.889429	0.263841	0.00427772	0.00391871	0.00966058	0.00481253	0.00636328	0.284258	0.329186	1.25268	-0.61414	-0.59585	-0.73166	-0.75512	-0.15318	-0.04845	-0.56114	17.9998	1.99993	1.99993
4b_py	-3237.94	-3237.22	-3237.18	-3237.18	-3237.3	-0.19008	-0.04568	6.8045	0.11788	-0.11788	0.0722	13.8504	0.0962306	10.3917	0.582094	-0.288932	-0.254819	-0.181833	-0.3713	-0.382867	-0.100555	-0.128949	-0.485254	0.010418	0.010161	-0.021896	0.011126	0.01174	0.681206	0.766131	0.239878	0.00514999	0.00502294	0.010824	0.00549998	0.0058035	0.336744	0.378726	1.26117	-0.62128	-0.58839	-0.71937	-0.7284	-0.17624	-0.15709	-0.54436	17.9998	1.99993	1.99993
4c_py	-2963.66	-2963.19	-2963.16	-2963.16	-2963.26	-0.19073	-0.04214	8.5931	0.116435	-0.116435	0.074295	13.4599	0.0912384	10.9603	0.600888	-0.276773	-0.267017	-0.183686	-0.371812	-0.385292	-0.091305	-0.021305	-0.746463	0.011934	0.010797	-0.029198	0.014321	0.017006	0.783067	0.912602	0.276475	0.00442012	0.00399899	0.0108144	0.00530421	0.00629868	0.290032	0.33801	1.24967	-0.6221	-0.60811	-0.72372	-0.73712	-0.15235	-0.03098	-0.55601	17.9998	1.99993	1.99993
4d_py_1	-3274.8	-3274.18	-3274.14	-3274.14	-3274.25	-0.19709	-0.05576	9.4645	0.126425	-0.126425	0.070665	14.1513	0.113092	8.84236	0.592046	-0.277977	-0.256931	-0.184544	-0.366981	-0.388903	-0.08124	-0.100182	-0.574125	0.011649	0.011117	-0.02366	0.0108	0.014348	0.726334	0.800593	0.259017	0.00525546	0.00501545	0.0106742	0.00487243	0.00647312	0.327687	0.361189	1.25769	-0.60233	-0.58657	-0.55827	-0.71925	-0.73798	-0.15596	-0.12814	17.9998	1.99993	1.99993
4d_py_2	-3274.8	-3274.18	-3274.14	-3274.14	-3274.25	-0.19708	-0.05575	9.4588	0.126415	-0.126415	0.070665	14.1513	0.113074	8.84376	0.591533	-0.277454	-0.257217	-0.184575	-0.366662	-0.388425	-0.081106	-0.099612	-0.575908	0.011674	0.011042	-0.023671	0.010771	0.014513	0.727023	0.80133	0.259408	0.00525835	0.00497368	0.0106622	0.00485161	0.00653713	0.327475	0.360945	1.25748	-0.60231	-0.58681	-0.5583	-0.71902	-0.73784	-0.15586	-0.12752	17.9998	1.99993	1.99993
4d_py_3	-3274.8	-3274.18	-3274.14	-3274.14	-3274.25	-0.19701	-0.05541	9.692	0.12621	-0.12621	0.0708	14.1243	0.112493	8.88947	0.593537	-0.273267	-0.257394	-0.18437	-0.370799	-0.379191	-0.093658	-0.111368	-0.525732	0.011293	0.01036	-0.023792	0.010601	0.012058	0.699757	0.785645	0.248258	0.00533271	0.00489213	0.0112349	0.00500594	0.00569395	0.330435	0.370992	1.26066	-0.60415	-0.58667	-0.54944	-0.72064	-0.72878	-0.16924	-0.13973	17.9998	1.99993	1.99993
4d_py_4	-3274.8	-3274.18	-3274.14	-3274.14	-3274.25	-0.19691	-0.05352	8.7589	0.125215	-0.125215	0.071695	13.948	0.109344	9.14547	0.624504	-0.272211	-0.257169	-0.203011	-0.378138	-0.392739	-0.08249	-0.110747	-0.561772	0.0147	0.012531	-0.022436	0.01056	0.012947	0.725983	0.789262	0.256369	0.00670845	0.00571861	0.0102388	0.00481913	0.00590846	0.331308	0.360186	1.25999	-0.59406	-0.59142	-0.55975	-0.72613	-0.73414	-0.15543	-0.13857	17.9998	1.99993	1.99993
4d_py_5	-3274.79	-3274.17	-3274.13	-3274.13	-3274.24	-0.19683	-0.05625	9.6188	0.12654	-0.12654	0.07029	14.2268	0.113902	8.77946	0.582527	-0.278155	-0.254972	-0.180403	-0.366104	-0.388835	-0.088906	-0.106953	-0.540527	0.008919	0.010904	-0.023482	0.010726	0.012228	0.707139	0.791693	0.251728	0.00415366	0.00507809	0.0109358	0.00499519	0.00569469	0.329321	0.368698	1.25861	-0.60176	-0.58298	-0.5545	-0.71775	-0.73679	-0.16462	-0.13508	17.9998	1.99993	1.99993
4d_py_6	-3274.79	-3274.17	-3274.13	-3274.13	-3274.24	-0.1983	-0.05425	8.6582	0.126275	-0.126275	0.072025	13.8841	0.110693	9.03397	0.611493	-0.267971	-0.255899	-0.202351	-0.382317	-0.38386	-0.084663	-0.120754	-0.53275	0.014752	0.011213	-0.023014	0.010193	0.012591	0.715043	0.775131	0.249389	0.00690566	0.00524899	0.0107732	0.00477151	0.00589406	0.334723	0.362852	1.26061	-0.58622	-0.59309	-0.55913	-0.72804	-0.72532	-0.15712	-0.1509	17.9998	1.99993	1.99993
4e_py	-3732.27	-3731.83	-3731.79	-3731.79	-3731.89	-0.19716	-0.05734	8.7731	0.12725	-0.12725	0.06991	14.3041	0.11581	8.63483	0.605357	-0.270977	-0.263071	-0.186138	-0.369941	-0.38285	-0.07827	-0.006541	-0.799368	0.012332	0.011133	-0.03183	0.014249	0.01716	0.811462	0.934011	0.28887	0.00445645	0.00402317	0.0115025	0.0051492	0.00620116	0.29324	0.337526	1.24624	-0.61319	-0.59981	-0.72241	-0.73603	-0.13546	-0.01454	-0.56149	17.9998	1.99993	1.99993
4f_py_1	-3268.58	-3268.03	-3267.99	-3267.99	-3268.11	-0.20604	-0.05687	8.9655	0.131455	-0.131455	0.074585	13.4075	0.115844	8.63231	0.607607	-0.267687	-0.262749	-0.187242	-0.361883	-0.37288	-0.075543	-0.001417	-0.811444	0.012675	0.011425	-0.032458	0.013965	0.016325	0.817784	0.940769	0.291344	0.00455087	0.00410207	0.0116538	0.00501404	0.00586138	0.29362	0.337777	1.24395	-0.61048	-0.59951	-0.7161	-0.72821	-0.13168	-0.00895	-0.56353	17.9998	1.99993	1.99993
4f_py_2	-3268.58	-3268.03	-3267.99	-3267.99	-3268.11	-0.20568	-0.05634	6.8341	0.13101	-0.13101	0.07467	13.3923	0.11493	8.70096	0.607332	-0.267702	-0.26244	-0.187221	-0.362027	-0.373406	-0.075462	-0.002216	-0.809982	0.012667	0.011419	-0.03237	0.013988	0.016368	0.817294	0.939759	0.314181	0.00491336	0.00442928	0.0125559	0.00542576	0.00634893	0.317018	0.36452	1.24392	-0.60974	-0.59906	-0.71615	-0.72851	-0.13173	-0.00981	-0.56343	17.9998	1.99993	1.99993
4g_py	-3127.4	-3126.72	-3126.68	-3126.68	-3126.79	-0.18746	-0.04634	7.9845	0.1169	-0.1169	0.07056	14.1723	0.0968368	10.3267	0.601368	-0.270127	-0.261624	-0.184183	-0.372104	-0.385868	-0.087317	-0.017275	-0.764491	0.011825	0.01063	-0.029871	0.014835	0.01789	0.791997	0.918735	0.281105	0.00434807	0.00390867	0.0109836	0.00545485	0.00657818	0.291219	0.33782	1.24848	-0.61548	-0.60227	-0.72462	-0.7384	-0.14709	-0.02643	-0.55754	17.9998	1.99993	1.99993
4h_py	-3362.93	-3362.08	-3362.03	-3362.03	-3362.16	-0.18856	-0.04758	7.8097	0.11807	-0.11807	0.07049	14.1864	0.098883	10.113	0.609536	-0.268921	-0.262861	-0.18197	-0.382033	-0.402067	-0.0868	-0.027924	-0.722091	0.011854	0.011189	-0.026873	0.013331	0.016482	0.773687	0.896258	0.284128	0.0046643	0.00440264	0.010574	0.00524547	0.00648532	0.30443	0.352659	1.25242	-0.61014	-0.60249	-0.73579	-0.74996	-0.15373	-0.04278	-0.56147	17.9998	1.99993	1.99993
4i_py	-2813.38	-2812.92	-2812.89	-2812.89	-2812.98	-0.1917	-0.04684	8.1971	0.11927	-0.11927	0.07243	13.8064	0.0982006	10.1832	0.602808	-0.272175	-0.264048	-0.18449	-0.37077	-0.384077	-0.085206	-0.015161	-0.771665	0.012114	0.010907	-0.030275	0.014525	0.017434	0.796347	0.921884	0.28193	0.00442588	0.0039849	0.0110611	0.00530675	0.00636956	0.290948	0.336813	1.24758	-0.61622	-0.60332	-0.7232	-0.73666	-0.14432	-0.02405	-0.55825	17.9998	1.99993	1.99993
4j_py	-3441.43	-3440.53	-3440.48	-3440.48	-3440.61	-0.18925	-0.04826	8.0065	0.118755	-0.118755	0.070495	14.1854	0.100027	9.99734	0.628765	-0.267379	-0.263709	-0.182122	-0.395265	-0.408791	-0.08043	-0.018435	-0.750507	0.012595	0.010961	-0.027291	0.013733	0.016999	0.787805	0.907601	0.273284	0.00458626	0.00399126	0.00993756	0.00500064	0.0061899	0.286866	0.330488	1.25633	-0.60705	-0.60335	-0.74801	-0.75717	-0.14393	-0.03311	-0.56448	17.9998	1.99993	1.99993
4k_py	-3221.91	-3221.44	-3221.41	-3221.41	-3221.51	-0.22542	-0.07616	10.32	0.15079	-0.15079	0.07463	13.3994	0.152336	6.56445	0.610468	-0.265434	-0.261106	-0.190304	-0.3568	-0.367088	-0.06843	0.009355	-0.838684	0.01285	0.011514	-0.03454	0.013382	0.015574	0.831836	0.954722	0.314202	0.00481408	0.00431357	0.01294	0.00501339	0.0058346	0.311636	0.357674	1.24178	-0.60418	-0.59363	-0.71112	-0.72291	-0.12287	0.00273	-0.56851	17.9998	1.99993	1.99993
4l_py	-4651.15	-4650.73	-4650.7	-4650.7	-4650.8	-0.2014	-0.06401	10.6166	0.132705	-0.132705	0.068695	14.5571	0.12818	7.80154	0.60517	-0.270616	-0.261679	-0.18891	-0.351979	-0.365379	-0.069984	0.009772	-0.838703	0.01265	0.011712	-0.034233	0.013265	0.01593	0.831127	0.955043	0.296018	0.00446478	0.00413371	0.0120824	0.00468184	0.00562244	0.293344	0.337079	1.24569	-0.61193	-0.59648	-0.71369	-0.72818	-0.1242	0.00309	-0.56599	17.9998	1.99993	1.99993
4m_py	-3042.12	-3041.6	-3041.56	-3041.56	-3041.66	-0.18041	-0.04191	6.1737	0.11116	-0.11116	0.06925	14.4404	0.0892169	11.2086	0.59932	-0.274401	-0.264552	-0.184192	-0.356656	-0.371399	-0.082299	-0.01197	-0.783984	0.012697	0.011506	-0.030941	0.013976	0.016981	0.803694	0.927008	0.294766	0.00477388	0.00432608	0.0116333	0.00525476	0.0063846	0.302177	0.348541	1.24748	-0.62011	-0.60516	-0.70708	-0.72202	-0.14003	-0.02034	-0.55795	17.9998	1.99993	1.99993
[truncated: 430 more columns]

## Sheet: syn_descriptors_all
	EE	Zero_Point	Thermal	Enthalpy	Gibbs	HOMO	LUMO	Dipole	Electronegativity	Chemical_potential	Hardness	Softness	Electrophilicity_index	Nucleophilicity_index	Mulliken_Charge_Co	Mulliken_Charge_N1	Mulliken_Charge_N2	Mulliken_Charge_N3	Mulliken_Charge_O1	Mulliken_Charge_O2	Mulliken_Charge_O3	Mulliken_Charge_O4	Mulliken_Charge_O5	Mulliken_Spin_Co	Mulliken_Spin_N1	Mulliken_Spin_N2	Mulliken_Spin_N3	Mulliken_Spin_O1	Mulliken_Spin_O2	Mulliken_Spin_O3	Mulliken_Spin_O4	Mulliken_Spin_O5	Mulliken_SpinFrac_Co	Mulliken_SpinFrac_N1	Mulliken_SpinFrac_N2	Mulliken_SpinFrac_N3	Mulliken_SpinFrac_O1	Mulliken_SpinFrac_O2	Mulliken_SpinFrac_O3	Mulliken_SpinFrac_O4	Mulliken_SpinFrac_O5	NPA_Charge_Co	NPA_Charge_N1	NPA_Charge_N2	NPA_Charge_N3	NPA_Charge_O1	NPA_Charge_O2	NPA_Charge_O3	NPA_Charge_O4
4a_meoh_1	-2988.29	-2987.74	-2987.71	-2987.71	-2987.81	-0.19958	-0.05308	7.1264	0.12633	-0.12633	0.07325	13.6519	0.108937	9.17962	0.609328	-0.28358	-0.270433		-0.406227	-0.420836	-0.063541	-0.06505	-0.354353	-0.705032	0.015102	0.013663		0.014432	0.01454	0.783397	0.851811	-0.013529	0.341336	0.00731151	0.00661483		0.00698714	0.00703943	0.379276	0.412398	0.00654996	1.24736	-0.60118	-0.59094		-0.74708	-0.79242	-0.14097	-0.04507
4a_meoh_2	-2988.29	-2987.74	-2987.71	-2987.71	-2987.81	-0.19963	-0.05317	5.9211	0.1264	-0.1264	0.07323	13.6556	0.109088	9.16695	0.614502	-0.271058	-0.269571		-0.402408	-0.450708	-0.078345	-0.023991	-0.353287	-0.740302	0.013312	0.013571		0.015594	0.017774	0.777191	0.891761	-0.013974	0.691578	0.0124359	0.0126778		0.0145677	0.0166042	0.726039	0.833069	0.0130543	1.25238	-0.60781	-0.58504		-0.74721	-0.77052	-0.12624	-0.08747
4a_meoh_3	-2988.29	-2987.74	-2987.71	-2987.71	-2987.81	-0.20411	-0.09943	7.5136	0.15177	-0.15177	0.05234	19.1058	0.220043	4.54456	0.620757	-0.279458	-0.276929		-0.405301	-0.443169	-0.062711	0.007976	-0.355911	-0.848494	0.014984	0.012793		0.015988	0.016777	0.828592	0.946549	-0.015822	0.793565	0.014014	0.0119648		0.014953	0.0156909	0.774951	0.885272	0.0147977	1.26591	-0.59573	-0.58605		-0.73469	-0.77325	-0.20024	-0.09921
4a_meoh_4	-2988.29	-2987.74	-2987.71	-2987.71	-2987.81	-0.19884	-0.05411	6.6658	0.126475	-0.126475	0.072365	13.8188	0.110523	9.04793	0.604253	-0.284129	-0.268127		-0.41362	-0.436303	-0.068129	-0.034501	-0.356115	-0.755658	0.013113	0.015528		0.012901	0.01843	0.789581	0.891769	-0.013975	0.270783	0.00469892	0.00556431		0.00462295	0.00660421	0.282939	0.319557	0.0050078	1.24771	-0.61169	-0.58854		-0.75575	-0.785	-0.13551	-0.04855
4a_meoh_5	-2988.29	-2987.74	-2987.71	-2987.71	-2987.81	-0.19756	-0.05232	7.3942	0.12494	-0.12494	0.07262	13.7703	0.107477	9.30429	0.613042	-0.279159	-0.269543		-0.398736	-0.434688	-0.066424	-0.000756	-0.347738	-0.823436	0.01352	0.013649		0.015151	0.018161	0.816257	0.934324	-0.015184	0.767186	0.0125964	0.0127166		0.014116	0.0169204	0.760497	0.870499	0.0141468	1.23784	-0.61386	-0.59237		-0.7523	-0.78014	-0.12296	-0.01432
4a_meoh_6	-2988.29	-2987.74	-2987.71	-2987.71	-2987.81	-0.19801	-0.05237	7.4365	0.12519	-0.12519	0.07282	13.7325	0.107611	9.29269	0.613909	-0.278194	-0.268848		-0.401952	-0.438373	-0.067764	-0.005337	-0.3483	-0.807259	0.013494	0.013863		0.015558	0.017628	0.809552	0.925136	-0.014921	0.28714	0.00479977	0.00493103		0.00553393	0.00627023	0.287955	0.329068	0.00530735	1.23946	-0.61193	-0.59081		-0.75227	-0.78288	-0.1252	-0.02121
4a_py_1	-3120.64	-3120.06	-3120.02	-3120.02	-3120.12	-0.19491	-0.05228	8.0184	0.123595	-0.123595	0.071315	14.0223	0.1071	9.33704	0.586654	-0.275757	-0.252829	-0.184558	-0.383632	-0.375621	-0.099725	-0.117282		-0.504668	0.011198	0.009683	-0.023046	0.009887	0.013196	0.687865	0.775708		0.212718	0.00471998	0.0040814	0.00971393	0.00416739	0.00556214	0.289936	0.326962		1.26326	-0.60436	-0.58503	-0.72226	-0.72418	-0.17707	-0.14693	-0.54925
4a_py_2	-3120.64	-3120.06	-3120.02	-3120.02	-3120.12	-0.19175	-0.05343	9.2153	0.12259	-0.12259	0.06916	14.4592	0.108649	9.20396	0.593708	-0.25813	-0.256391	-0.183733	-0.373912	-0.408744	-0.114992	-0.069231		-0.546644	0.010107	0.009588	-0.023358	0.012304	0.014859	0.68365	0.819484		0.220443	0.00407581	0.00386652	0.0094195	0.00496179	0.00599214	0.275693	0.33047		1.26153	-0.59932	-0.59455	-0.72087	-0.74296	-0.19467	-0.09859	-0.55382
4a_py_3	-3120.64	-3120.06	-3120.02	-3120.02	-3120.13	-0.19124	-0.05054	9.2591	0.12089	-0.12089	0.07035	14.2146	0.103869	9.6275	0.59527	-0.270033	-0.261672	-0.183527	-0.387415	-0.399185	-0.09211	-0.035756		-0.694373	0.013012	0.009004	-0.028273	0.013842	0.015838	0.759643	0.886195		0.249757	0.00468026	0.00323863	0.0101694	0.0049788	0.00569673	0.273234	0.318753		1.2494	-0.61529	-0.59822	-0.7306	-0.74272	-0.16128	-0.05203	-0.55542
4a_py_4	-3120.64	-3120.06	-3120.02	-3120.02	-3120.13	-0.19327	-0.0517	8.9559	0.122485	-0.122485	0.070785	14.1273	0.105973	9.43638	0.589982	-0.274302	-0.251206	-0.187344	-0.394485	-0.398127	-0.102859	-0.077596		-0.580341	0.010946	0.01164	-0.025096	0.011097	0.015496	0.707081	0.826462		0.231353	0.00436363	0.00464029	0.0100045	0.00442382	0.00617749	0.281878	0.329469		1.26245	-0.60947	-0.59143	-0.73227	-0.74328	-0.18315	-0.09903	-0.55323
4a_py_5	-3120.64	-3120.06	-3120.02	-3120.02	-3120.13	-0.19207	-0.05125	9.1603	0.12166	-0.12166	0.07041	14.2025	0.105107	9.51412	0.60681	-0.272757	-0.261775	-0.183386	-0.381801	-0.407263	-0.083612	-0.021169		-0.741996	0.01172	0.010933	-0.027886	0.012885	0.017928	0.782395	0.904918		0.270634	0.00427472	0.00398767	0.0101711	0.00469964	0.00653901	0.285369	0.330057		1.24886	-0.61122	-0.59958	-0.73264	-0.75041	-0.14757	-0.03707	-0.5627
4a_py_6	-3120.64	-3120.06	-3120.02	-3120.02	-3120.13	-0.19213	-0.05109	9.3986	0.12161	-0.12161	0.07052	14.1804	0.104857	9.53682	0.610413	-0.279423	-0.253628	-0.179954	-0.387713	-0.413169	-0.088424	-0.028148		-0.712875	0.011558	0.010588	-0.026102	0.013003	0.017193	0.76804	0.889429		0.263841	0.00427772	0.00391871	0.00966058	0.00481253	0.00636328	0.284258	0.329186		1.25268	-0.61414	-0.59585	-0.73166	-0.75512	-0.15318	-0.04845	-0.56114
4b_meoh	-3105.59	-3104.91	-3104.87	-3104.87	-3104.98	-0.193	-0.04067	4.3338	0.116835	-0.116835	0.076165	13.1294	0.0896108	11.1594	0.604352	-0.294642	-0.267978		-0.396998	-0.423646	-0.06417	-0.076724	-0.347453	-0.68606	0.015113	0.01382		0.015042	0.013517	0.7783	0.842305	-0.01284	0.33026	0.00727519	0.00665276		0.00724102	0.0065069	0.374663	0.405474	0.006181	1.2511	-0.62632	-0.58568		-0.74423	-0.77069	-0.12587	-0.09783
4b_py	-3237.94	-3237.22	-3237.18	-3237.18	-3237.3	-0.19008	-0.04568	6.8045	0.11788	-0.11788	0.0722	13.8504	0.0962306	10.3917	0.582094	-0.288932	-0.254819	-0.181833	-0.3713	-0.382867	-0.100555	-0.128949		-0.485254	0.010418	0.010161	-0.021896	0.011126	0.01174	0.681206	0.766131		0.239878	0.00514999	0.00502294	0.010824	0.00549998	0.0058035	0.336744	0.378726		1.26117	-0.62128	-0.58839	-0.71937	-0.7284	-0.17624	-0.15709	-0.54436
4c_meoh	-2831.31	-2830.88	-2830.85	-2830.85	-2830.94	-0.19598	-0.04002	6.8287	0.118	-0.118	0.07798	12.8238	0.0892793	11.2008	0.607377	-0.284161	-0.277361		-0.394887	-0.426484	-0.071534	0.003233	-0.355804	-0.82971	0.01454	0.013578		0.01628	0.016247	0.817752	0.942815	-0.01563	0.303611	0.00532054	0.00496852		0.00595725	0.00594518	0.299236	0.344999	0.0057194	1.23815	-0.6188	-0.60104		-0.74525	-0.77821	-0.12576	-0.00647
4c_py	-2963.66	-2963.19	-2963.16	-2963.16	-2963.26	-0.19073	-0.04214	8.5931	0.116435	-0.116435	0.074295	13.4599	0.0912384	10.9603	0.600888	-0.276773	-0.267017	-0.183686	-0.371812	-0.385292	-0.091305	-0.021305		-0.746463	0.011934	0.010797	-0.029198	0.014321	0.017006	0.783067	0.912602		0.276475	0.00442012	0.00399899	0.0108144	0.00530421	0.00629868	0.290032	0.33801		1.24967	-0.6221	-0.60811	-0.72372	-0.73712	-0.15235	-0.03098	-0.55601
4d_meoh_1	-3142.44	-3141.86	-3141.82	-3141.82	-3141.93	-0.19791	-0.05652	7.2514	0.127215	-0.127215	0.070695	14.1453	0.114461	8.73659	0.620971	-0.281216	-0.283483		-0.397776	-0.389049	-0.046585	-0.023292	-0.351695	-0.821541	0.013098	0.018243		0.013266	0.017428	0.833739	0.910704	-0.016406	0.302013	0.00481506	0.00670646		0.00487682	0.00640685	0.306498	0.334791	0.00603114	1.24737	-0.61385	-0.60374		-0.75092	-0.75006	-0.10825	-0.03749
4d_meoh_2	-3142.45	-3141.86	-3141.82	-3141.82	-3141.93	-0.20204	-0.09919	8.6552	0.150615	-0.150615	0.051425	19.4458	0.220563	4.53386	0.660369	-0.272504	-0.271357		-0.372918	-0.392387	-0.126622	-0.084106	-0.351769	0.199155	-0.003338	-0.006157		-0.004933	-0.005686	0.318519	0.506331	0.001061	0.187304	0.00313937	0.00579062		0.00463945	0.00534764	0.299565	0.476201	0.000997863	1.27732	-0.59529	-0.59126		-0.72752	-0.72948	-0.19912	-0.10669
4d_py_1	-3274.8	-3274.18	-3274.14	-3274.14	-3274.25	-0.19709	-0.05576	9.4645	0.126425	-0.126425	0.070665	14.1513	0.113092	8.84236	0.592046	-0.277977	-0.256931	-0.184544	-0.366981	-0.388903	-0.08124	-0.100182		-0.574125	0.011649	0.011117	-0.02366	0.0108	0.014348	0.726334	0.800593		0.259017	0.00525546	0.00501545	0.0106742	0.00487243	0.00647312	0.327687	0.361189		1.25769	-0.60233	-0.58657	-0.55827	-0.71925	-0.73798	-0.15596	-0.12814
4d_py_2	-3274.8	-3274.18	-3274.14	-3274.14	-3274.25	-0.19708	-0.05575	9.4588	0.126415	-0.126415	0.070665	14.1513	0.113074	8.84376	0.591533	-0.277454	-0.257217	-0.184575	-0.366662	-0.388425	-0.081106	-0.099612		-0.575908	0.011674	0.011042	-0.023671	0.010771	0.014513	0.727023	0.80133		0.259408	0.00525835	0.00497368	0.0106622	0.00485161	0.00653713	0.327475	0.360945		1.25748	-0.60231	-0.58681	-0.5583	-0.71902	-0.73784	-0.15586	-0.12752
4d_py_3	-3274.8	-3274.18	-3274.14	-3274.14	-3274.25	-0.19701	-0.05541	9.692	0.12621	-0.12621	0.0708	14.1243	0.112493	8.88947	0.593537	-0.273267	-0.257394	-0.18437	-0.370799	-0.379191	-0.093658	-0.111368		-0.525732	0.011293	0.01036	-0.023792	0.010601	0.012058	0.699757	0.785645		0.248258	0.00533271	0.00489213	0.0112349	0.00500594	0.00569395	0.330435	0.370992		1.26066	-0.60415	-0.58667	-0.54944	-0.72064	-0.72878	-0.16924	-0.13973
4d_py_4	-3274.8	-3274.18	-3274.14	-3274.14	-3274.25	-0.19691	-0.05352	8.7589	0.125215	-0.125215	0.071695	13.948	0.109344	9.14547	0.624504	-0.272211	-0.257169	-0.203011	-0.378138	-0.392739	-0.08249	-0.110747		-0.561772	0.0147	0.012531	-0.022436	0.01056	0.012947	0.725983	0.789262		0.256369	0.00670845	0.00571861	0.0102388	0.00481913	0.00590846	0.331308	0.360186		1.25999	-0.59406	-0.59142	-0.55975	-0.72613	-0.73414	-0.15543	-0.13857
4d_py_5	-3274.79	-3274.17	-3274.13	-3274.13	-3274.24	-0.19683	-0.05625	9.6188	0.12654	-0.12654	0.07029	14.2268	0.113902	8.77946	0.582527	-0.278155	-0.254972	-0.180403	-0.366104	-0.388835	-0.088906	-0.106953		-0.540527	0.008919	0.010904	-0.023482	0.010726	0.012228	0.707139	0.791693		0.251728	0.00415366	0.00507809	0.0109358	0.00499519	0.00569469	0.329321	0.368698		1.25861	-0.60176	-0.58298	-0.5545	-0.71775	-0.73679	-0.16462	-0.13508
4d_py_6	-3274.79	-3274.17	-3274.13	-3274.13	-3274.24	-0.1983	-0.05425	8.6582	0.126275	-0.126275	0.072025	13.8841	0.110693	9.03397	0.611493	-0.267971	-0.255899	-0.202351	-0.382317	-0.38386	-0.084663	-0.120754		-0.53275	0.014752	0.011213	-0.023014	0.010193	0.012591	0.715043	0.775131		0.249389	0.00690566	0.00524899	0.0107732	0.00477151	0.00589406	0.334723	0.362852		1.26061	-0.58622	-0.59309	-0.55913	-0.72804	-0.72532	-0.15712	-0.1509
4e_meoh	-3599.91	-3599.51	-3599.48	-3599.48	-3599.57	-0.20282	-0.06073	6.6721	0.131775	-0.131775	0.071045	14.0756	0.122209	8.18272	0.607862	-0.279005	-0.270552		-0.39341	-0.420666	-0.064405	0.012861	-0.352891	-0.860977	0.014119	0.013312		0.016227	0.016635	0.832593	0.956098	-0.016777	0.317266	0.00520279	0.00490542		0.00597958	0.00612993	0.306807	0.352318	0.00618225	1.2354	-0.61213	-0.59036		-0.74317	-0.77214	-0.11724	0.00425
4e_py	-3732.27	-3731.83	-3731.79	-3731.79	-3731.89	-0.19716	-0.05734	8.7731	0.12725	-0.12725	0.06991	14.3041	0.11581	8.63483	0.605357	-0.270977	-0.263071	-0.186138	-0.369941	-0.38285	-0.07827	-0.006541		-0.799368	0.012332	0.011133	-0.03183	0.014249	0.01716	0.811462	0.934011		0.28887	0.00445645	0.00402317	0.0115025	0.0051492	0.00620116	0.29324	0.337526		1.24624	-0.61319	-0.59981	-0.72241	-0.73603	-0.13546	-0.01454	-0.56149
4f_meoh_1	-3136.23	-3135.72	-3135.68	-3135.68	-3135.79	-0.22119	-0.1062	8.0829	0.163695	-0.163695	0.057495	17.3928	0.233029	4.2913	0.611618	-0.27759	-0.271343		-0.384182	-0.412569	-0.062257	0.017176	-0.355602	-0.86983	0.014595	0.013605		0.015493	0.015904	0.837366	0.961682	-0.01697	0.316437	0.00530954	0.00494938		0.00563622	0.00578574	0.304627	0.349852	0.00617354	1.26215	-0.59438	-0.57926		-0.71834	-0.75068	-0.19895	-0.08868
4f_meoh_2	-3136.23	-3135.72	-3135.68	-3135.68	-3135.79	-0.2107	-0.05943	4.3498	0.135065	-0.135065	0.075635	13.2214	0.120596	8.29215	0.609372	-0.277773	-0.269943		-0.385172	-0.409581	-0.062318	0.015667	-0.3517	-0.867244	0.014192	0.013614		0.015403	0.015997	0.836464	0.959908	-0.016907	0.368683	0.00603331	0.00578759		0.00654813	0.00680065	0.355598	0.408076	0.00718751	1.2333	-0.61113	-0.59024		-0.73655	-0.76181	-0.1147	0.00732
4f_py_1	-3268.58	-3268.03	-3267.99	-3267.99	-3268.11	-0.20604	-0.05687	8.9655	0.131455	-0.131455	0.074585	13.4075	0.115844	8.63231	0.607607	-0.267687	-0.262749	-0.187242	-0.361883	-0.37288	-0.075543	-0.001417		-0.811444	0.012675	0.011425	-0.032458	0.013965	0.016325	0.817784	0.940769		0.291344	0.00455087	0.00410207	0.0116538	0.00501404	0.00586138	0.29362	0.337777		1.24395	-0.61048	-0.59951	-0.7161	-0.72821	-0.13168	-0.00895	-0.56353
4f_py_2	-3268.58	-3268.03	-3267.99	-3267.99	-3268.11	-0.20568	-0.05634	6.8341	0.13101	-0.13101	0.07467	13.3923	0.11493	8.70096	0.607332	-0.267702	-0.26244	-0.187221	-0.362027	-0.373406	-0.075462	-0.002216		-0.809982	0.012667	0.011419	-0.03237	0.013988	0.016368	0.817294	0.939759		0.314181	0.00491336	0.00442928	0.0125559	0.00542576	0.00634893	0.317018	0.36452		1.24392	-0.60974	-0.59906	-0.71615	-0.72851	-0.13173	-0.00981	-0.56343
4g_meoh	-2995.05	-2994.4	-2994.36	-2994.36	-2994.48	-0.19327	-0.04838	6.0019	0.120825	-0.120825	0.072445	13.8036	0.100757	9.92487	0.605867	-0.277774	-0.270688		-0.395254	-0.428062	-0.069906	0.005534	-0.356419	-0.839484	0.014149	0.013038		0.017075	0.017228	0.821304	0.945956	-0.016006	0.307076	0.00517559	0.00476919		0.0062459	0.00630186	0.300426	0.346023	0.00585486	1.23722	-0.61217	-0.5939		-0.74625	-0.78048	-0.12387	-0.00385
4g_py	-3127.4	-3126.72	-3126.68	-3126.68	-3126.79	-0.18746	-0.04634	7.9845	0.1169	-0.1169	0.07056	14.1723	0.0968368	10.3267	0.601368	-0.270127	-0.261624	-0.184183	-0.372104	-0.385868	-0.087317	-0.017275		-0.764491	0.011825	0.01063	-0.029871	0.014835	0.01789	0.791997	0.918735		0.281105	0.00434807	0.00390867	0.0109836	0.00545485	0.00657818	0.291219	0.33782		1.24848	-0.61548	-0.60227	-0.72462	-0.7384	-0.14709	-0.02643	-0.55754
4h_meoh	-3230.58	-3229.77	-3229.72	-3229.72	-3229.84	-0.19302	-0.04691	6.0316	0.119965	-0.119965	0.073055	13.6883	0.0984984	10.1524	0.619466	-0.278009	-0.269416		-0.399693	-0.437008	-0.068699	-0.006121	-0.349737	-0.809796	0.013801	0.013773		0.01561	0.017045	0.81081	0.926922	-0.014056	0.300761	0.00512574	0.00511534		0.00579761	0.00633057	0.301137	0.344262	0.00522044	1.24052	-0.6123	-0.59365		-0.75407	-0.787	-0.12638	-0.01895
4h_py	-3362.93	-3362.08	-3362.03	-3362.03	-3362.16	-0.18856	-0.04758	7.8097	0.11807	-0.11807	0.07049	14.1864	0.098883	10.113	0.609536	-0.268921	-0.262861	-0.18197	-0.382033	-0.402067	-0.0868	-0.027924		-0.722091	0.011854	0.011189	-0.026873	0.013331	0.016482	0.773687	0.896258		0.284128	0.0046643	0.00440264	0.010574	0.00524547	0.00648532	0.30443	0.352659		1.25242	-0.61014	-0.60249	-0.73579	-0.74996	-0.15373	-0.04278	-0.56147
4i_meoh	-2681.02	-2680.6	-2680.57	-2680.57	-2680.66	-0.20712	-0.0936	7.2983	0.15036	-0.15036	0.05676	17.618	0.199155	5.0212	0.607551	-0.280037	-0.272973		-0.393745	-0.425512	-0.068175	0.00734	-0.356015	-0.845231	0.01443	0.013254		0.016645	0.016844	0.824817	0.948637	-0.016117	0.312737	0.00533913	0.00490401		0.00615869	0.00623232	0.305184	0.350998	0.00596332	1.26532	-0.59906	-0.58332		-0.72683	-0.76226	-0.20421	-0.09649
4i_py	-2813.38	-2812.92	-2812.89	-2812.89	-2812.98	-0.1917	-0.04684	8.1971	0.11927	-0.11927	0.07243	13.8064	0.0982006	10.1832	0.602808	-0.272175	-0.264048	-0.18449	-0.37077	-0.384077	-0.085206	-0.015161		-0.771665	0.012114	0.010907	-0.030275	0.014525	0.017434	0.796347	0.921884		0.28193	0.00442588	0.0039849	0.0110611	0.00530675	0.00636956	0.290948	0.336813		1.24758	-0.61622	-0.60332	-0.7232	-0.73666	-0.14432	-0.02405	-0.55825
4j_meoh	-3309.08	-3308.21	-3308.16	-3308.16	-3308.29	-0.19274	-0.04809	6.3586	0.120415	-0.120415	0.072325	13.8265	0.10024	9.97602	0.627588	-0.279808	-0.269203		-0.407622	-0.429015	-0.064623	-0.001681	-0.34501	-0.820762	0.014834	0.013371		0.014654	0.016711	0.816734	0.928396	-0.014537	0.446226	0.00806484	0.00726945		0.00796698	0.00908531	0.444036	0.504744	0.00790337	1.24552	-0.61805	-0.59764		-0.76099	-0.77766	-0.12035	-0.01647
4j_py	-3441.43	-3440.53	-3440.48	-3440.48	-3440.61	-0.18925	-0.04826	8.0065	0.118755	-0.118755	0.070495	14.1854	0.100027	9.99734	0.628765	-0.267379	-0.263709	-0.182122	-0.395265	-0.408791	-0.08043	-0.018435		-0.750507	0.012595	0.010961	-0.027291	0.013733	0.016999	0.787805	0.907601		0.273284	0.00458626	0.00399126	0.00993756	0.00500064	0.0061899	0.286866	0.330488		1.25633	-0.60705	-0.60335	-0.74801	-0.75717	-0.14393	-0.03311	-0.56448
4k_meoh	-3089.56	-3089.13	-3089.1	-3089.09	-3089.19	-0.23063	-0.07965	8.0271	0.15514	-0.15514	0.07549	13.2468	0.159415	6.27295	0.61342	-0.276001	-0.268789		-0.378955	-0.40143	-0.057295	0.025498	-0.352308	-0.889604	0.014093	0.01357		0.014483	0.015265	0.846697	0.972401	-0.017963	0.31783	0.00503503	0.00484818		0.00517436	0.00545375	0.302501	0.347411	0.00641767	1.23203	-0.60597	-0.58551		-0.73066	-0.75343	-0.1087	0.01803
4k_py	-3221.91	-3221.44	-3221.41	-3221.41	-3221.51	-0.22542	-0.07616	10.32	0.15079	-0.15079	0.07463	13.3994	0.152336	6.56445	0.610468	-0.265434	-0.261106	-0.190304	-0.3568	-0.367088	-0.06843	0.009355		-0.838684	0.01285	0.011514	-0.03454	0.013382	0.015574	0.831836	0.954722		0.314202	0.00481408	0.00431357	0.01294	0.00501339	0.0058346	0.311636	0.357674		1.24178	-0.60418	-0.59363	-0.71112	-0.72291	-0.12287	0.00273	-0.56851
4l_meoh	-4518.8	-4518.42	-4518.38	-4518.38	-4518.48	-0.21601	-0.11171	9.6758	0.16386	-0.16386	0.05215	19.1755	0.257431	3.88453	0.612378	-0.278007	-0.273245		-0.371597	-0.404291	-0.058691	0.027451	-0.360364	-0.892529	0.014814	0.013579		0.014946	0.015551	0.846614	0.974321	-0.018159	0.320315	0.00531653	0.0048733		0.0053639	0.00558102	0.303837	0.349669	0.006517	1.26201	-0.59065	-0.57775		-0.71587	-0.75018	-0.19508	-0.07992
4l_py	-4651.15	-4650.73	-4650.7	-4650.7	-4650.8	-0.2014	-0.06401	10.6166	0.132705	-0.132705	0.068695	14.5571	0.12818	7.80154	0.60517	-0.270616	-0.261679	-0.18891	-0.351979	-0.365379	-0.069984	0.009772		-0.838703	0.01265	0.011712	-0.034233	0.013265	0.01593	0.831127	0.955043		0.296018	0.00446478	0.00413371	0.0120824	0.00468184	0.00562244	0.293344	0.337079		1.24569	-0.61193	-0.59648	-0.71369	-0.72818	-0.1242	0.00309	-0.56599
4m_meoh	-2909.77	-2909.28	-2909.25	-2909.25	-2909.34	-0.18696	-0.04334	3.7115	0.11515	-0.11515	0.07181	13.9256	0.0923236	10.8315	0.607633	-0.281925	-0.275807		-0.378196	-0.41555	-0.0648	0.011597	-0.36021	-0.862032	0.01529	0.014057		0.016171	0.01652	0.83326	0.955096	-0.016199	0.313806	0.00556602	0.00511717		0.00588673	0.00601378	0.303332	0.347684	0.00589692	1.23587	-0.61471	-0.59799		-0.72995	-0.76567	-0.11676	0.00314
4m_py	-3042.12	-3041.6	-3041.56	-3041.56	-3041.66	-0.18041	-0.04191	6.1737	0.11116	-0.11116	0.06925	14.4404	0.0892169	11.2086	0.59932	-0.274401	-0.264552	-0.184192	-0.356656	-0.371399	-0.082299	-0.01197		-0.783984	0.012697	0.011506	-0.030941	0.013976	0.016981	0.803694	0.927008		0.294766	0.00477388	0.00432608	0.0116333	0.00525476	0.0063846	0.302177	0.348541		1.24748	-0.62011	-0.60516	-0.70708	-0.72202	-0.14003	-0.02034	-0.55795
[truncated: 472 more columns]

## Sheet: syn_distributions
	BOLTZ_HOMO	BOLTZ_LUMO	BOLTZ_Dipole	BOLTZ_Electronegativity	BOLTZ_Chemical_potential	BOLTZ_Hardness	BOLTZ_Softness	BOLTZ_Electrophilicity_index	BOLTZ_Nucleophilicity_index	BOLTZ_Mulliken_Charge_Co	BOLTZ_Mulliken_Charge_N1	BOLTZ_Mulliken_Charge_N2	BOLTZ_Mulliken_Charge_O1	BOLTZ_Mulliken_Charge_O2	BOLTZ_Mulliken_Charge_O3	BOLTZ_Mulliken_Charge_O4	BOLTZ_Mulliken_Spin_Co	BOLTZ_Mulliken_Spin_N1	BOLTZ_Mulliken_Spin_N2	BOLTZ_Mulliken_Spin_O1	BOLTZ_Mulliken_Spin_O2	BOLTZ_Mulliken_Spin_O3	BOLTZ_Mulliken_Spin_O4	BOLTZ_Mulliken_SpinFrac_Co	BOLTZ_Mulliken_SpinFrac_N1	BOLTZ_Mulliken_SpinFrac_N2	BOLTZ_Mulliken_SpinFrac_O1	BOLTZ_Mulliken_SpinFrac_O2	BOLTZ_Mulliken_SpinFrac_O3	BOLTZ_Mulliken_SpinFrac_O4	BOLTZ_NPA_Charge_Co	BOLTZ_NPA_Charge_N1	BOLTZ_NPA_Charge_N2	BOLTZ_NPA_Charge_O1	BOLTZ_NPA_Charge_O2	BOLTZ_NPA_Charge_O3	BOLTZ_NPA_Charge_O4	BOLTZ_NPA_Core_Co	BOLTZ_NPA_Core_N1	BOLTZ_NPA_Core_N2	BOLTZ_NPA_Core_O1	BOLTZ_NPA_Core_O2	BOLTZ_NPA_Core_O3	BOLTZ_NPA_Core_O4	BOLTZ_NPA_Valence_Co	BOLTZ_NPA_Valence_N1	BOLTZ_NPA_Valence_N2	BOLTZ_NPA_Valence_O1	BOLTZ_NPA_Valence_O2
4a_meoh	-0.199621	-0.0607425	7.00963	0.130182	-0.130182	0.0694392	14.622	0.12727	8.4231	0.612632	-0.279262	-0.270574	-0.404706	-0.437347	-0.0678196	-0.0202716	-0.780038	0.0139206	0.0138445	0.0149374	0.0172187	0.800763	0.906898	0.52528	0.00930946	0.0090785	0.0101304	0.0115221	0.535289	0.608327	1.24844	-0.607036	-0.588959	-0.748218	-0.780701	-0.141845	-0.0526283	17.9998	1.99993	1.99993	1.99994	1.99994	1.99996	1.99997	7.7334	5.58545	5.56726	6.73658	6.76973
4a_py	-0.192561	-0.0517147	9.00147	0.122138	-0.122138	0.0704233	14.2011	0.105925	9.44269	0.597145	-0.271736	-0.25625	-0.384828	-0.400358	-0.0969491	-0.0581794	-0.630198	0.0114236	0.0102397	0.0121701	0.0157526	0.731466	0.85039	0.241471	0.00439861	0.00395559	0.00467405	0.00605535	0.281729	0.327484	1.25636	-0.608969	-0.594112	-0.743118	-0.169479	-0.08033	-0.55593	17.9998	1.99993	1.99993	1.99994	1.99996	1.99997	1.99993	7.72629	5.58724	5.57245	6.73126	6.14393
4b_meoh	-0.193	-0.04067	4.3338	0.116835	-0.116835	0.076165	13.1294	0.0896108	11.1594	0.604352	-0.294642	-0.267978	-0.396998	-0.423646	-0.06417	-0.076724	-0.68606	0.015113	0.01382	0.015042	0.013517	0.7783	0.842305	0.33026	0.00727519	0.00665276	0.00724102	0.0065069	0.374663	0.405474	1.2511	-0.62632	-0.58568	-0.74423	-0.77069	-0.12587	-0.09783	17.9998	1.99993	1.99993	1.99994	1.99994	1.99996	1.99998	7.72943	5.60477	5.56403	6.73309	6.76005
4b_py	-0.19008	-0.04568	6.8045	0.11788	-0.11788	0.0722	13.8504	0.0962306	10.3917	0.582094	-0.288932	-0.254819	-0.3713	-0.382867	-0.100555	-0.128949	-0.485254	0.010418	0.010161	0.011126	0.01174	0.681206	0.766131	0.239878	0.00514999	0.00502294	0.00549998	0.0058035	0.336744	0.378726	1.26117	-0.62128	-0.58839	-0.7284	-0.17624	-0.15709	-0.54436	17.9998	1.99993	1.99993	1.99994	1.99996	1.99997	1.99993	7.71871	5.59973	5.5669	6.71695	6.1516
4c_meoh	-0.19598	-0.04002	6.8287	0.118	-0.118	0.07798	12.8238	0.0892793	11.2008	0.607377	-0.284161	-0.277361	-0.394887	-0.426484	-0.071534	0.003233	-0.82971	0.01454	0.013578	0.01628	0.016247	0.817752	0.942815	0.303611	0.00532054	0.00496852	0.00595725	0.00594518	0.299236	0.344999	1.23815	-0.6188	-0.60104	-0.74525	-0.77821	-0.12576	-0.00647	17.9998	1.99993	1.99993	1.99994	1.99994	1.99996	1.99998	7.74257	5.59682	5.57897	6.73373	6.76732
4c_py	-0.19073	-0.04214	8.5931	0.116435	-0.116435	0.074295	13.4599	0.0912384	10.9603	0.600888	-0.276773	-0.267017	-0.371812	-0.385292	-0.091305	-0.021305	-0.746463	0.011934	0.010797	0.014321	0.017006	0.783067	0.912602	0.276475	0.00442012	0.00399899	0.00530421	0.00629868	0.290032	0.33801	1.24967	-0.6221	-0.60811	-0.73712	-0.15235	-0.03098	-0.55601	17.9998	1.99993	1.99993	1.99994	1.99996	1.99998	1.99993	7.73163	5.59989	5.58601	6.7253	6.12526
4d_meoh	-0.199974	-0.0778464	7.95302	0.13891	-0.13891	0.0610639	16.7945	0.167491	6.63607	0.640662	-0.276862	-0.277422	-0.385352	-0.390717	-0.0865874	-0.0536868	-0.311399	0.00488331	0.00604791	0.00417017	0.00587566	0.576233	0.708599	0.244682	0.00397755	0.00624872	0.00475819	0.00587746	0.303033	0.405468	1.26234	-0.604574	-0.597503	-0.739225	-0.739774	-0.153667	-0.0720761	17.9998	1.99993	1.99993	1.99994	1.99994	1.99996	1.99997	7.71957	5.58285	5.576	6.72783	6.72842
4d_py	-0.197203	-0.055157	9.27552	0.12618	-0.12618	0.0710229	14.081	0.1121	8.92238	0.59927	-0.27451	-0.256598	-0.371827	-0.386994	-0.0853413	-0.108259	-0.551828	0.0121641	0.0111946	0.0106088	0.0131154	0.716889	0.790622	0.254034	0.00560206	0.00515441	0.00488599	0.00603397	0.330154	0.364141	1.25917	-0.59848	-0.587922	-0.721802	-0.73348	-0.159703	-0.136645	17.9998	1.99993	1.99993	1.99994	1.99994	1.99996	1.99997	7.72335	5.57706	5.56678	6.7106	6.72234
4e_meoh	-0.20282	-0.06073	6.6721	0.131775	-0.131775	0.071045	14.0756	0.122209	8.18272	0.607862	-0.279005	-0.270552	-0.39341	-0.420666	-0.064405	0.012861	-0.860977	0.014119	0.013312	0.016227	0.016635	0.832593	0.956098	0.317266	0.00520279	0.00490542	0.00597958	0.00612993	0.306807	0.352318	1.2354	-0.61213	-0.59036	-0.74317	-0.77214	-0.11724	0.00425	17.9998	1.99993	1.99993	1.99994	1.99994	1.99996	1.99998	7.74534	5.59014	5.56832	6.73159	6.76115
4e_py	-0.19716	-0.05734	8.7731	0.12725	-0.12725	0.06991	14.3041	0.11581	8.63483	0.605357	-0.270977	-0.263071	-0.369941	-0.38285	-0.07827	-0.006541	-0.799368	0.012332	0.011133	0.014249	0.01716	0.811462	0.934011	0.28887	0.00445645	0.00402317	0.0051492	0.00620116	0.29324	0.337526	1.24624	-0.61319	-0.59981	-0.73603	-0.13546	-0.01454	-0.56149	17.9998	1.99993	1.99993	1.99994	1.99996	1.99998	1.99993	7.73534	5.59099	5.5777	6.72415	6.10784
4f_meoh	-0.215945	-0.0828164	6.21646	0.149381	-0.149381	0.0665644	15.3072	0.176816	6.2916	0.610495	-0.277681	-0.270643	-0.384677	-0.411075	-0.0622875	0.0164215	-0.868537	0.0143935	0.0136095	0.015448	0.0159505	0.836915	0.960795	0.342558	0.0056714	0.00536846	0.00609215	0.00629316	0.330111	0.378962	1.24773	-0.602754	-0.58475	-0.727444	-0.756245	-0.156828	-0.040683	17.9998	1.99993	1.99993	1.99994	1.99994	1.99996	1.99998	7.73189	5.5809	5.56293	6.71575	6.74515
4f_py	-0.20586	-0.056605	7.89972	0.131232	-0.131232	0.0746275	13.3999	0.115387	8.66664	0.607469	-0.267695	-0.262594	-0.361955	-0.373143	-0.0755025	-0.00181653	-0.810713	0.012671	0.011422	0.0139765	0.0163465	0.817539	0.940264	0.302763	0.00473213	0.00426569	0.00521992	0.00610518	0.30532	0.35115	1.24393	-0.61011	-0.599285	-0.72836	-0.131705	-0.00938003	-0.56348	17.9998	1.99993	1.99993	1.99994	1.99996	1.99998	1.99993	7.73793	5.58792	5.5772	6.71633	6.104
4g_meoh	-0.19327	-0.04838	6.0019	0.120825	-0.120825	0.072445	13.8036	0.100757	9.92487	0.605867	-0.277774	-0.270688	-0.395254	-0.428062	-0.069906	0.005534	-0.839484	0.014149	0.013038	0.017075	0.017228	0.821304	0.945956	0.307076	0.00517559	0.00476919	0.0062459	0.00630186	0.300426	0.346023	1.23722	-0.61217	-0.5939	-0.74625	-0.78048	-0.12387	-0.00385	17.9998	1.99993	1.99993	1.99994	1.99994	1.99996	1.99998	7.74322	5.59016	5.57175	6.73481	6.7697
4g_py	-0.18746	-0.04634	7.9845	0.1169	-0.1169	0.07056	14.1723	0.0968368	10.3267	0.601368	-0.270127	-0.261624	-0.372104	-0.385868	-0.087317	-0.017275	-0.764491	0.011825	0.01063	0.014835	0.01789	0.791997	0.918735	0.281105	0.00434807	0.00390867	0.00545485	0.00657818	0.291219	0.33782	1.24848	-0.61548	-0.60227	-0.7384	-0.14709	-0.02643	-0.55754	17.9998	1.99993	1.99993	1.99994	1.99996	1.99998	1.99993	7.73269	5.59323	5.5801	6.72667	6.11981
4h_meoh	-0.19302	-0.04691	6.0316	0.119965	-0.119965	0.073055	13.6883	0.0984984	10.1524	0.619466	-0.278009	-0.269416	-0.399693	-0.437008	-0.068699	-0.006121	-0.809796	0.013801	0.013773	0.01561	0.017045	0.81081	0.926922	0.300761	0.00512574	0.00511534	0.00579761	0.00633057	0.301137	0.344262	1.24052	-0.6123	-0.59365	-0.75407	-0.787	-0.12638	-0.01895	17.9998	1.99993	1.99993	1.99994	1.99994	1.99996	1.99997	7.74254	5.59052	5.57194	6.74326	6.77689
4h_py	-0.18856	-0.04758	7.8097	0.11807	-0.11807	0.07049	14.1864	0.098883	10.113	0.609536	-0.268921	-0.262861	-0.382033	-0.402067	-0.0868	-0.027924	-0.722091	0.011854	0.011189	0.013331	0.016482	0.773687	0.896258	0.284128	0.0046643	0.00440264	0.00524547	0.00648532	0.30443	0.352659	1.25242	-0.61014	-0.60249	-0.74996	-0.15373	-0.04278	-0.56147	17.9998	1.99993	1.99993	1.99994	1.99996	1.99997	1.99993	7.73136	5.58822	5.58069	6.7389	6.12724
4i_meoh	-0.20712	-0.0936	7.2983	0.15036	-0.15036	0.05676	17.618	0.199155	5.0212	0.607551	-0.280037	-0.272973	-0.393745	-0.425512	-0.068175	0.00734	-0.845231	0.01443	0.013254	0.016645	0.016844	0.824817	0.948637	0.312737	0.00533913	0.00490401	0.00615869	0.00623232	0.305184	0.350998	1.26532	-0.59906	-0.58332	-0.72683	-0.76226	-0.20421	-0.09649	17.9999	1.99993	1.99993	1.99994	1.99994	1.99996	1.99998	7.71245	5.57729	5.5615	6.71535	6.75153
4i_py	-0.1917	-0.04684	8.1971	0.11927	-0.11927	0.07243	13.8064	0.0982006	10.1832	0.602808	-0.272175	-0.264048	-0.37077	-0.384077	-0.085206	-0.015161	-0.771665	0.012114	0.010907	0.014525	0.017434	0.796347	0.921884	0.28193	0.00442588	0.0039849	0.00530675	0.00636956	0.290948	0.336813	1.24758	-0.61622	-0.60332	-0.73666	-0.14432	-0.02405	-0.55825	17.9998	1.99993	1.99993	1.99994	1.99996	1.99998	1.99993	7.73375	5.594	5.58118	6.72489	6.11699
4j_meoh	-0.19274	-0.04809	6.3586	0.120415	-0.120415	0.072325	13.8265	0.10024	9.97602	0.627588	-0.279808	-0.269203	-0.407622	-0.429015	-0.064623	-0.001681	-0.820762	0.014834	0.013371	0.014654	0.016711	0.816734	0.928396	0.446226	0.00806484	0.00726945	0.00796698	0.00908531	0.444036	0.504744	1.24552	-0.61805	-0.59764	-0.76099	-0.77766	-0.12035	-0.01647	17.9998	1.99993	1.99993	1.99994	1.99994	1.99996	1.99997	7.73801	5.59627	5.57593	6.7504	6.76747
4j_py	-0.18925	-0.04826	8.0065	0.118755	-0.118755	0.070495	14.1854	0.100027	9.99734	0.628765	-0.267379	-0.263709	-0.395265	-0.408791	-0.08043	-0.018435	-0.750507	0.012595	0.010961	0.013733	0.016999	0.787805	0.907601	0.273284	0.00458626	0.00399126	0.00500064	0.0061899	0.286866	0.330488	1.25633	-0.60705	-0.60335	-0.75717	-0.14393	-0.03311	-0.56448	17.9998	1.99993	1.99993	1.99994	1.99996	1.99997	1.99993	7.72811	5.58497	5.58146	6.74646	6.11734
4k_meoh	-0.23063	-0.07965	8.0271	0.15514	-0.15514	0.07549	13.2468	0.159415	6.27295	0.61342	-0.276001	-0.268789	-0.378955	-0.40143	-0.057295	0.025498	-0.889604	0.014093	0.01357	0.014483	0.015265	0.846697	0.972401	0.31783	0.00503503	0.00484818	0.00517436	0.00545375	0.302501	0.347411	1.23203	-0.60597	-0.58551	-0.73066	-0.75343	-0.1087	0.01803	17.9998	1.99993	1.99993	1.99994	1.99994	1.99996	1.99998	7.74943	5.58403	5.56362	6.71878	6.74205
4k_py	-0.22542	-0.07616	10.32	0.15079	-0.15079	0.07463	13.3994	0.152336	6.56445	0.610468	-0.265434	-0.261106	-0.3568	-0.367088	-0.06843	0.009355	-0.838684	0.01285	0.011514	0.013382	0.015574	0.831836	0.954722	0.314202	0.00481408	0.00431357	0.00501339	0.0058346	0.311636	0.357674	1.24178	-0.60418	-0.59363	-0.72291	-0.12287	0.00273	-0.56851	17.9998	1.99993	1.99993	1.99994	1.99997	1.99998	1.99993	7.74046	5.58204	5.57159	6.71071	6.09489
4l_meoh	-0.21601	-0.11171	9.6758	0.16386	-0.16386	0.05215	19.1755	0.257431	3.88453	0.612378	-0.278007	-0.273245	-0.371597	-0.404291	-0.058691	0.027451	-0.892529	0.014814	0.013579	0.014946	0.015551	0.846614	0.974321	0.320315	0.00531653	0.0048733	0.0053639	0.00558102	0.303837	0.349669	1.26201	-0.59065	-0.57775	-0.71587	-0.75018	-0.19508	-0.07992	17.9999	1.99993	1.99993	1.99994	1.99994	1.99996	1.99998	7.7162	5.5691	5.55611	6.70383	6.73885
4l_py	-0.2014	-0.06401	10.6166	0.132705	-0.132705	0.068695	14.5571	0.12818	7.80154	0.60517	-0.270616	-0.261679	-0.351979	-0.365379	-0.069984	0.009772	-0.838703	0.01265	0.011712	0.013265	0.01593	0.831127	0.955043	0.296018	0.00446478	0.00413371	0.00468184	0.00562244	0.293344	0.337079	1.24569	-0.61193	-0.59648	-0.72818	-0.1242	0.00309	-0.56599	17.9998	1.99993	1.99993	1.99994	1.99997	1.99998	1.99993	7.73649	5.58986	5.57455	6.71586	6.09626
4m_meoh	-0.18696	-0.04334	3.7115	0.11515	-0.11515	0.07181	13.9256	0.0923236	10.8315	0.607633	-0.281925	-0.275807	-0.378196	-0.41555	-0.0648	0.011597	-0.862032	0.01529	0.014057	0.016171	0.01652	0.83326	0.955096	0.313806	0.00556602	0.00511717	0.00588673	0.00601378	0.303332	0.347684	1.23587	-0.61471	-0.59799	-0.72995	-0.76567	-0.11676	0.00314	17.9998	1.99993	1.99993	1.99994	1.99994	1.99996	1.99998	7.74486	5.59291	5.57602	6.71786	6.75424
4m_py	-0.18041	-0.04191	6.1737	0.11116	-0.11116	0.06925	14.4404	0.0892169	11.2086	0.59932	-0.274401	-0.264552	-0.356656	-0.371399	-0.082299	-0.01197	-0.783984	0.012697	0.011506	0.013976	0.016981	0.803694	0.927008	0.294766	0.00477388	0.00432608	0.00525476	0.0063846	0.302177	0.348541	1.24748	-0.62011	-0.60516	-0.72202	-0.14003	-0.02034	-0.55795	17.9998	1.99993	1.99993	1.99994	1.99996	1.99998	1.99993	7.73412	5.59806	5.5832	6.70964	6.11256
[truncated: 1,611 more columns]
